# Supplementary material for: Nickel limited methanogens shaped Precambrian climate
Source: Research Square preprint supplement (doi:10.21203/rs.3.rs-7483247/v1), 2025-09-09
Supplement: Supplementary file 1 [file bcc20e99ab384dd65b2a31e2.xlsx]

## Sheet: Sheet1
Supplementary Table1. Basic information of genomes of class II methanogens
ncbi_genbank_assembly_accession	ncbi_biosample	GTDB_taxonomy							checkm_completeness(%)	checkm_contamination(%)	GC content(%)	genome_size(bp)	average Amino Acid rate on faimly-level(%)
		class	order	family	genus	proposed metabolism type for each genus	methane production	reference					G	A	V	L	I	P	F	Y	W	S	T	C	M	N	Q	D	E	K	R	H
GCA_013415795.1	SAMN13220420	c__UBA148	o__UBA148	f__UBA148	g__UBA148	carbon dioxide hydrogenotrophic methanogenesis	unknown	(C Zhang, 2020)	86.6	2.29	40.6957	941283	0.0741717	0.0694354	0.0705681	0.0927237	0.0883734	0.0394572	0.0389003	0.0315711	0.0094086	0.0621291	0.0501158	0.0131422	0.0273839	0.0384802	0.0244712	0.0575641	0.071496	0.0716804	0.049912	0.0190155
GCA_002495885.1	SAMN06027039	c__UBA148	o__UBA148	f__UBA148	g__UBA148	carbon dioxide hydrogenotrophic methanogenesis	unknown	(C Zhang, 2020)	96.24	2.29	42.5972	1648397
GCA_000063445.1	SAMEA3138262	c__Methanocellia	o__Methanocellales	f__Methanocellaceae	g__Methanocella_A	carbon dioxide hydrogenotrophic methanogenesis	unknown	(C Erkel, 2006)	100	0	54.603	3179916	0.0786725	0.0862497	0.0764794	0.0921696	0.07132	0.0448257	0.0369886	0.0362329	0.00945508	0.0609099	0.0541023	0.0127463	0.0305216	0.0351137	0.0252615	0.0569241	0.0624075	0.0590167	0.0532352	0.0173676
GCA_000011005.1	SAMD00060931	c__Methanocellia	o__Methanocellales	f__Methanocellaceae	g__Methanocella	carbon dioxide hydrogenotrophic methanogenesis	unknown	(S Sakai, 2008)	100	0.65	54.9169	2957635
GCA_015660915.1	SAMN15669914	c__Bog-38	o__Bog-38	f__Bog-38	g__Bog-38	carbon dioxide hydrogenotrophic methanogenesis	unknown	(R Mondav, 2014)	96.57	0.65	50.9783	2043713	0.0719643	0.0937003	0.0812315	0.0985817	0.0669891	0.0420224	0.0383226	0.0307068	0.00959014	0.0618681	0.0583183	0.0126332	0.0221092	0.034249	0.0304659	0.0544529	0.0628005	0.0498597	0.0594633	0.0206713
GCA_003162175.1	SAMN08178736	c__Bog-38	o__Bog-38	f__Bog-38	g__Bog-38	carbon dioxide hydrogenotrophic methanogenesis	unknown	(R Mondav, 2014)	94.61	1.36	52.2759	1719785
GCA_009779205.1	SAMN12581962	c__Methanomicrobia	o__Methanomicrobiales	f__Methanospirillaceae	g__WRER01	undefined	unknown		73.82	2.09	42.4943	1245354	0.0737486	0.0734556	0.0685041	0.091441	0.084551	0.0447255	0.0393761	0.033363	0.00951739	0.068138	0.0593693	0.0142235	0.0254817	0.0376596	0.030957	0.0570411	0.0668765	0.0499928	0.0504921	0.0210859
GCA_003251955.1	SAMN09288007	c__Methanomicrobia	o__Methanomicrobiales	f__Methanospirillaceae	g__Methanospirillum	carbon dioxide hydrogenotrophic methanogenesis	1.39μmol/ml·d	(JG Ferr, 1974)	75.44	1.47	47.4768	1642397
GCA_016926505.1	SAMN17242118	c__Methanomicrobia	o__Methanomicrobiales	f__Methanospirillaceae	g__JAFGOM01	undefined	unknown		98.04	0.65	46.4812	2936193
GCA_903926075.1	SAMEA6956626	c__Methanomicrobia	o__Methanomicrobiales	f__Methanospirillaceae	g__CAIYHQ01	undefined	unknown		95.07	0	40.5747	3172064
GCA_004332335.1	SAMN10910799	c__Methanomicrobia	o__Methanomicrobiales	f__Methanosphaerulaceae	g__UBA288	undefined	unknown		95.07	0	66.3974	2367119	0.0854429	0.09752	0.081264	0.0980917	0.0609908	0.0514176	0.0355441	0.0280274	0.0105719	0.0564836	0.0632869	0.0127154	0.0235714	0.0293205	0.0295088	0.055218	0.0629795	0.0311126	0.066622	0.0203109
GCA_000021965.1	SAMN00001866	c__Methanomicrobia	o__Methanomicrobiales	f__Methanosphaerulaceae	g__Methanosphaerula	carbon dioxide hydrogenotrophic methanogenesis	unknown	(H Cadillo-Quiroz, 2009)	99.84	0	55.3537	2922917
GCA_019633745.1	SAMN11125589	c__Methanomicrobia	o__Methanomicrobiales	f__Methanofollaceae	g__Methanofollis	carbon dioxide hydrogenotrophic methanogenesis	0.28μmol/ml·d	(H. Imachi,2009)	98.04	0.65	60.32	2965921	0.0865588	0.100119	0.0848382	0.0927283	0.0578801	0.0492401	0.0371673	0.0302358	0.011003	0.052298	0.0602334	0.0137312	0.0244888	0.0276737	0.0237622	0.0569141	0.0727983	0.036045	0.0623839	0.0199007
GCA_001315945.1	SAMD00000408	c__Methanomicrobia	o__Methanomicrobiales	f__Methanomicrobiaceae	g__Methanogenium	carbon dioxide hydrogenotrophic methanogenesis	1.14μmol/ml·d	(BM Ollivier, 1986)	85.25	0	52.0582	2686643	0.0823509	0.0905003	0.0742041	0.0879313	0.0735712	0.046196	0.038362	0.0319322	0.00953252	0.0601642	0.0555543	0.0151681	0.0273091	0.0333375	0.0240912	0.0585039	0.0688601	0.0456217	0.05759	0.0192192
GCA_013415665.1	SAMN13220425	c__Methanomicrobia	o__Methanomicrobiales	f__Methanomicrobiaceae	g__LKUD01	carbon dioxide hydrogenotrophic methanogenesis	unknown	(CJ Zhang, 2020)	93.66	1.96	60.6215	1712362
GCA_011048835.1	SAMN09639132	c__Methanomicrobia	o__Methanomicrobiales	f__Methanomicrobiaceae	g__DSDF01	carbon dioxide hydrogenotrophic methanogenesis	unknown	(Z Zhou, 2020)	97.02	0.13	61.2516	1994405
GCF_000711215.1	SAMN02745537	c__Methanomicrobia	o__Methanomicrobiales	f__Methanomicrobiaceae	g__Methanomicrobium	carbon dioxide hydrogenotrophic methanogenesis	0.51μmol/ml·d	(S Kumar, 2012)	97.39	0.65	49.46	1711791
GCF_000784355.1	SAMN03196739	c__Methanomicrobia	o__Methanomicrobiales	f__Methanomicrobiaceae	g__Methanolacinia	carbon dioxide hydrogenotrophic methanogenesis	0.007μmol/ml·d	(van Bruggen, 1986)	98.37	0.65	47.54	2791704
GCA_002503135.1	SAMN06027568	c__Methanomicrobia	o__Methanomicrobiales	f__Methanoculleaceae	g__UBA207	undefined	unknown		93.14	0	54.5462	1289766	0.0843623	0.0978288	0.0793884	0.09395	0.068535	0.0482584	0.0356389	0.0298281	0.00965591	0.0530525	0.0542085	0.0142159	0.0259626	0.0259902	0.0249421	0.0565163	0.070319	0.0340407	0.072363	0.0209433
GCA_002503105.1	SAMN06027567	c__Methanomicrobia	o__Methanomicrobiales	f__Methanoculleaceae	g__UBA206	undefined	unknown		94.12	0.65	62.9951	1617645
GCA_020854755.1	SAMN19322289	c__Methanomicrobia	o__Methanomicrobiales	f__Methanoculleaceae	g__JAHKLN01	undefined	unknown		80	0	60.54	2010371
GCA_004102725.1	SAMN03856099	c__Methanomicrobia	o__Methanomicrobiales	f__Methanoculleaceae	g__Methanoculleus_A	carbon dioxide hydrogenotrophic methanogenesis	unknown	(CY. Weng, 2015)	99.02	0.65	59.9729	2750720
GCA_001571405.1	SAMD00044722	c__Methanomicrobia	o__Methanomicrobiales	f__Methanoculleaceae	g__Methanoculleus	carbon dioxide hydrogenotrophic methanogenesis	unknown	(L. Cheng,2008)	98.69	0	59.6639	1904813
GCA_018883755.1	SAMN15816796	c__Methanomicrobia	o__Methanomicrobiales	f__Methanocorpusculaceae	g__Methanocorpusculum	carbon dioxide hydrogenotrophic methanogenesis	unknown	(Y. Zhao, 1989)	90.99	2.94	50.7523	1251241	0.0800818	0.0910574	0.0746344	0.0930781	0.0769293	0.0467072	0.0365787	0.0310836	0.00931631	0.0582059	0.0578851	0.0142575	0.02772	0.0292385	0.0261635	0.0565356	0.0691852	0.0427867	0.0580858	0.0204694
GCA_018132105.1	SAMN03254652	c__Methanomicrobia	o__Methanomicrobiales	f__Methanocorpusculaceae	g__Methanocalculus	carbon dioxide hydrogenotrophic methanogenesis	unknown	(M. Lai, 2004)	99.02	0.65	52.2332	2134545
GCA_015660865.1	SAMN15670553	c__Methanomicrobia	o__Methanomicrobiales	f__JACTUA01	g__JACTUA01	undefined	unknown		99.67	0.87	59.508	1935927	0.0877677	0.0892325	0.0753128	0.0968367	0.0699553	0.0514898	0.0387754	0.0279038	0.0100914	0.0574081	0.0546266	0.0126796	0.0249777	0.0272802	0.0254044	0.0523677	0.0671982	0.0433108	0.0674995	0.0198815
GCA_013331415.1	SAMN13192961	c__Methanomicrobia	o__Methanomicrobiales	f__Methanoregulaceae	g__UBA9949	undefined	unknown		86.76	1.31	58.8456	1732923	0.0820917	0.0832379	0.075601	0.0918572	0.0739986	0.0492877	0.0398146	0.0310343	0.0103348	0.0616379	0.0586724	0.0135831	0.026186	0.0330411	0.0279935	0.0542476	0.0638053	0.0448178	0.0588078	0.0199495
GCA_002503825.1	SAMN06027139	c__Methanomicrobia	o__Methanomicrobiales	f__Methanoregulaceae	g__UBA467	undefined	unknown		99.67	1.31	50.9059	2838694
GCA_001412335.1	SAMN04125648	c__Methanomicrobia	o__Methanomicrobiales	f__Methanoregulaceae	g__SD8	undefined	unknown		97.53	2.83	54.2318	2165812
GCA_015660965.1	SAMN15949236	c__Methanomicrobia	o__Methanomicrobiales	f__Methanoregulaceae	g__MVRE01	undefined	unknown		98.36	2.96	42.3555	2428622
GCA_000017625.1	SAMN02598409	c__Methanomicrobia	o__Methanomicrobiales	f__Methanoregulaceae	g__Methanoregula	carbon dioxide hydrogenotrophic methanogenesis	0.004μmol/ml·d	(SL. Bräuer, 2011)	99.54	1.31	54.5136	2542943
GCA_017873855.1	SAMN18245708	c__Methanomicrobia	o__Methanomicrobiales	f__Methanoregulaceae	g__Methanolinea_B	carbon dioxide hydrogenotrophic methanogenesis	unknown	(S. Sakai, 2011)	99.67	0.65	57.3992	2662345
GCA_002509495.1	SAMN06027619	c__Methanomicrobia	o__Methanomicrobiales	f__Methanoregulaceae	g__Methanolinea_A	carbon dioxide hydrogenotrophic methanogenesis	unknown	(H Imachi, 2008)	92.32	0	56.3253	2197766
GCA_903828975.1	SAMEA6956550	c__Methanomicrobia	o__Methanomicrobiales	f__Methanoregulaceae	g__CAIKOD01	undefined	unknown		99.02	4.71	49.5912	2582402
GCA_013330515.1	SAMN13193009	c__Methanosarcinia_A	o__Methanosarcinales_A	f__Methermicoccaceae	g__Methermicoccus	methoxyl dismutating methanogenesis	0.266μmol/ml·d	(D Mayumi, 2016)	98.04	0	55.36	1368840	0.0770205	0.0728113	0.0883846	0.0974516	0.0698924	0.0421774	0.0351352	0.0318813	0.00960151	0.0597473	0.0465102	0.0148682	0.0293051	0.0288745	0.0205091	0.0509133	0.0846614	0.0556441	0.0633471	0.0212641
GCA_002010075.1	SAMN06226336	c__Methanosarcinia_A	o__Methanosarcinales_A	f__Methermicoccaceae	g__JdFR-19	undefined	unknown		96.73	0	43.1999	1288683
GCA_002501765.1	SAMN06027569	c__Methanosarcinia	o__Methanotrichales	f__Methanotrichaceae	g__UBA204	undefined	unknown		96.22	0.66	54.5374	1808468	0.0823919	0.0871009	0.0738638	0.0978737	0.0658097	0.0450453	0.0348181	0.0302699	0.0112546	0.0659373	0.0468681	0.0130266	0.0285587	0.0312595	0.0273219	0.0584461	0.0712904	0.0472551	0.0642037	0.0174046
GCA_002506335.1	SAMN06027416	c__Methanosarcinia	o__Methanotrichales	f__Methanotrichaceae	g__UBA114	undefined	unknown		98.37	0.65	52.024	2412234
GCA_002067795.1	SAMN04534949	c__Methanosarcinia	o__Methanotrichales	f__Methanotrichaceae	g__MVQI01	undefined	unknown		74.84	0.65	55.3319	1930391
GCA_000014945.1	SAMN02598350	c__Methanosarcinia	o__Methanotrichales	f__Methanotrichaceae	g__Methanothrix_B	acetate cleaving methanogenesis	0.47μmol/ml·d	(Y KAMAGATA, 1991)	100	0	53.8534	1895070
GCA_002506535.1	SAMN06027621	c__Methanosarcinia	o__Methanotrichales	f__Methanotrichaceae	g__Methanothrix_A	acetate cleaving methanogenesis	0.007μmol/ml·d	(K Ma, 2006)	98.73	0.88	58.7467	2328353
GCA_002067365.1	SAMN04534952	c__Methanosarcinia	o__Methanotrichales	f__Methanotrichaceae	g__Methanothrix	acetate cleaving methanogenesis	0.03μmol/ml·d	(MSM Jetten, 1992)	98.47	0.87	53.3315	2776683
GCA_016927425.1	SAMN17242071	c__Methanosarcinia	o__Methanotrichales	f__Methanotrichaceae	g__JAFGMR01	undefined	unknown		98.53	0.65	56.0575	2317673
GCA_013178225.1	SAMN14896038	c__Methanosarcinia	o__Methanotrichales	f__Methanotrichaceae	g__JABLXE01	undefined	unknown		98.86	0	53.7432	2978549
GCA_013415595.1	SAMN13220431	c__Methanosarcinia	o__Methanotrichales	f__Methanotrichaceae	g__JAAEEW01	undefined	unknown		93.63	0.65	60.5359	1938857
GCA_003162615.1	SAMN08178753	c__Methanosarcinia	o__Methanotrichales	f__Methanotrichaceae	g__Fen-7	acetate cleaving methanogenesis	unknown	(JB Emerson, 2018)	76.93	0.65	51.1665	1533097
GCA_905171695.1	SAMEA7740440	c__Methanosarcinia	o__Methanosarcinales	f__EX4572-44	g__EX4572-44	ethanotrophy	unknown	(N Dombrowski, 2017)	98.04	2.29	46.509	1920273	0.0716339	0.0682618	0.0719291	0.0909932	0.0834381	0.0387339	0.0370622	0.0343888	0.0095231	0.06115	0.0578409	0.0132701	0.0248384	0.0409891	0.0237587	0.0557766	0.0764072	0.0634733	0.0555237	0.0210079
GCA_004212095.1	SAMN10390738	c__Methanosarcinia	o__Methanosarcinales	f__EX4572-44	g__Ethanoperedens	ethanotrophy	unknown	(G Borrel, 2019)	91.18	0	40.9514	1458808
GCA_002926195.1	SAMN06562579	c__Methanosarcinia	o__Methanosarcinales	f__Methanocomedenaceae	g__Methanomarinus	methanotrophy	unknown	(CT. Skennerton, 2017)	85.79	1.96	38.8109	2447688	0.0740318	0.0683166	0.0720004	0.0902899	0.086848	0.0396546	0.0387037	0.0329272	0.00912793	0.0617142	0.055281	0.0125115	0.0298044	0.0431952	0.0279941	0.0608316	0.0686806	0.0607108	0.0463618	0.0210145
GCA_009649835.1	SAMN08574221	c__Methanosarcinia	o__Methanosarcinales	f__Methanocomedenaceae	g__Methanocomedens	methanotrophy	unknown	(H Yu, 2018)	91.18	0.65	46.0345	1813034
GCA_014859725.1	SAMN15871820	c__Methanosarcinia	o__Methanosarcinales	f__Methanocomedenaceae	g__Kmv04	methanotrophy	unknown	(AV Mardanov, 2020)	97.71	0.65	41.7508	2397132
GCA_019429385.1	SAMN20345953	c__Methanosarcinia	o__Methanosarcinales	f__Methanocomedenaceae	g__QBUR01	methanotrophy	unknown	(AY Merkel, 2021)	100	1.96	45.38	2400975
GCA_013331375.1	SAMN13192964	c__Methanosarcinia	o__Methanosarcinales	f__Methanoperedenaceae	g__UBA10536	undefined	unknown		82.78	0.65	52.2123	1648413	0.0773551	0.0758182	0.0715127	0.0909706	0.0825945	0.0398166	0.0403489	0.0321025	0.00904721	0.0634318	0.0525745	0.0122604	0.0283583	0.0416495	0.0237029	0.0542199	0.0689693	0.0655524	0.0510357	0.0186789
GCA_014859785.1	SAMN15871819	c__Methanosarcinia	o__Methanosarcinales	f__Methanoperedenaceae	g__Methanoperedens_A	methanotrophy	unknown	(AV Mardanov, 2020)	98.86	0.65	43.9955	1868446
GCA_003104905.1	SAMN08364719	c__Methanosarcinia	o__Methanosarcinales	f__Methanoperedenaceae	g__Methanoperedens	methanotrophy	unknown	(Chen Cai, 2018)	98.69	1.31	40.8083	2913215
GCA_004211975.1	SAMN10390739	c__Methanosarcinia	o__Methanosarcinales	f__Methanogasteraceae	g__Methanogaster	methanotrophy	unknown	(G Borrel, 2019)	91.99	1.96	48.4534	2656101	0.0772561	0.0773654	0.0764864	0.0858651	0.0790033	0.039929	0.0358702	0.0320922	0.0100214	0.0619148	0.0625561	0.0144326	0.0277972	0.0408822	0.0244459	0.0650729	0.0657778	0.0502501	0.0510913	0.0218899
GCA_012962625.1	SAMN10967526	c__Methanosarcinia	o__Methanosarcinales	f__AMNE-2 UWMA-0185	g__AMNE-2_UWMA-0185	methanotrophy	unknown	(Z Zhou, 2020)	92.32	1.33	32.77	1948009	0.0623816	0.0597454	0.0640594	0.0921588	0.101262	0.0365669	0.0393495	0.0398511	0.00874592	0.0602148	0.050489	0.0119516	0.0223985	0.0523827	0.0233927	0.0530164	0.0752364	0.0901009	0.0395762	0.0171206
GCA_013329415.1	SAMN13193061	c__Methanosarcinia	o__Methanosarcinales	f__Methanosarcinaceae	g__MTP4	undefined	unknown		95.78	0	46.7944	3855240	0.0707597	0.0682874	0.0707815	0.0894664	0.0836514	0.0377753	0.0406928	0.0347432	0.00879704	0.0659355	0.0543579	0.0121343	0.0278775	0.0468433	0.0259655	0.059984	0.0737623	0.0664928	0.042944	0.0187482
GCA_000970085.1	SAMN03074589	c__Methanosarcinia	o__Methanosarcinales	f__Methanosarcinaceae	g__Methanosarcina	carbon dioxide hydrogenotrophic methanogenesis	0.6μmol/ml·d	(T. J. Hutten, 1980)	99.84	0.65	42.6009	5427890
						methyl dismutating methanogenesis	3.6μmol/ml·d	(T. J. Hutten, 1980)
						acetate cleaving methanogenesis	1.4μmol/ml·d	(T. J. Hutten, 1980)
						methyl reducing methanogenesis	0.1μmol/ml·d	(T. J. Hutten, 1980)
GCA_003555325.1	SAMN08575091	c__Methanosarcinia	o__Methanosarcinales	f__Methanosarcinaceae	g__Methanosalsum	methyl dismutating methanogenesis	unknown	(DY Sorokin, 2015)	87.06	1.96	34.7085	1533015
GCA_000328665.1	SAMN02261367	c__Methanosarcinia	o__Methanosarcinales	f__Methanosarcinaceae	g__Methanomethylovorans	methyl dismutating methanogenesis	4.16μmol/ml·d	(BP Lomans, 1999)	99.84	0.33	41.867	2714013
GCA_000306725.1	SAMN00739943	c__Methanosarcinia	o__Methanosarcinales	f__Methanosarcinaceae	g__Methanolobus	methyl dismutating methanogenesis	unknown	(PC Kadam, 1995)	99.84	0	44.6109	3072769
GCA_017874375.1	SAMN18247105	c__Methanosarcinia	o__Methanosarcinales	f__Methanosarcinaceae	g__Methanohalophilus	methyl dismutating methanogenesis	unknown	(T Katayama, 2014)	99.18	0	42.5202	2116010
GCA_000196655.1	SAMN00015125	c__Methanosarcinia	o__Methanosarcinales	f__Methanosarcinaceae	g__Methanohalobium	methyl dismutating methanogenesis	unknown	(A Kallistova, 2020)	100	1.96	36.425	2406232
GCA_000013725.1	SAMN02598545	c__Methanosarcinia	o__Methanosarcinales	f__Methanosarcinaceae	g__Methanococcoides	methyl dismutating methanogenesis	unknown	(KR Sowers, 1983)	99.35	0.65	40.7581	2575032
GCA_004363215.1	SAMN08769569	c__Methanosarcinia	o__Methanosarcinales	f__Methanosarcinaceae	g__Methanimicrococcus	methyl reducing methanogenesis	unknown	(CM. Thomas, 2021)	94.12	0.65	41.9841	1783317
GCA_016926455.1	SAMN17242120	c__Methanosarcinia	o__Methanosarcinales	f__Methanosarcinaceae	g__JAFGQV01	undefined	unknown		80.55	1.68	41.4308	1602817
GCA_012329085.1	SAMN13172858	c__Methanosarcinia	o__Methanosarcinales	f__Methanosarcinaceae	g__JAAXQB01	undefined	unknown		84.87	4.74	29.8195	2369335
GCA_020793565.1	-	c__Methanosarcinia	o__Methanosarcinales	f__Methanosarcinaceae	ANME-3_HMMV_MAG	methanotrophy	unknown	(T Lösekann, 2007)	98	3	41.5	2450789
GCA_021106765.1	SAMN21083300	c__Methanosarcinia	o__Methanosarcinales	f__Methanosarcinaceae	g__JAIOTO01	undefined	unknown		98.53	2.29	45.74	1736988

## Sheet: Sheet2
Supplementary Table2. Nickel-dependent proteins encoded in SC-Methanosarcinia and SC-Methanomicrobia
genome accession	superclass	genus	[NiFe]-hydrogenase					CO dehydrogenase		MCR	Acetyl-CoA synthase	Ni-dependent lactate racemase	Ni-dependent hydrogenases		Ni-containing superoxide dismutase	urease C
			echE	ehaO	frhA	mvhA	vhoA	cdhA	cooS	mcrA	Acs	LarA	AraM	mbhL	NiSOD	UreC
GCA_015660915.1	SC-Methanomicrobia	Ca.Methanoflorens	1	0	1	1	0	0	0	1	1	1	1	0	0	0
GCA_003162175.1	SC-Methanomicrobia	Ca.Methanoflorens	0	0	1	1	0	0	1	1	4	1	1	0	0	0
GCA_000063445.1	SC-Methanomicrobia	Methanocella_A	1	0	2	2	1	1	0	1	2	2	0	1	0	0
GCA_000011005.1	SC-Methanomicrobia	Methanocella	2	0	2	2	1	0	0	1	2	2	0	1	0	0
GCA_018132105.1	SC-Methanomicrobia	Methanocalculus	0	1	1	0	0	0	2	1	4	1	0	1	0	0
GCA_018883755.1	SC-Methanomicrobia	Methanocorpusculum	1	1	1	0	0	0	0	1	2	1	0	1	0	0
GCA_019633745.1	SC-Methanomicrobia	Methanofollis	1	1	1	1	0	0	1	2	4	2	1	0	0	0
GCA_015660865.1	SC-Methanomicrobia	JACTUA01	1	0	1	1	0	1	0	1	2	1	0	1	0	0
GCA_001315945.1	SC-Methanomicrobia	Methanogenium	1	2	1	4	0	0	1	2	12	0	0	3	0	0
GCA_011048835.1	SC-Methanomicrobia	DSDF01	0	1	1	1	0	0	0	2	4	1	1	1	0	0
GCA_013415665.1	SC-Methanomicrobia	LKUD01	0	1	1	1	0	0	1	0	4	2	1	1	0	0
GCA_002503135.1	SC-Methanomicrobia	UBA207	0	1	1	0	0	0	1	1	2	1	0	1	0	0
GCA_020854755.1	SC-Methanomicrobia	JAHKLN01	0	1	0	1	0	1	0	0	4	1	0	1	0	0
GCA_002503105.1	SC-Methanomicrobia	UBA206	0	1	1	1	0	0	0	0	1	1	0	1	0	0
GCA_004102725.1	SC-Methanomicrobia	Methanoculleus_A	1	1	1	1	0	0	0	1	4	2	0	1	0	0
GCA_001571405.1	SC-Methanomicrobia	Methanoculleus	1	1	1	1	0	0	1	2	4	1	0	0	0	0
GCA_004332335.1	SC-Methanomicrobia	UBA288	1	0	3	0	0	1	1	1	3	1	0	0	0	0
GCA_000021965.1	SC-Methanomicrobia	Methanosphaerula	1	0	1	0	0	0	1	1	4	1	1	0	0	0
GCA_009779205.1	SC-Methanomicrobia	WRER01	1	0	1	0	0	0	0	0	2	1	1	1	0	0
GCA_003251955.1	SC-Methanomicrobia	Methanospirillum	1	0	2	0	0	1	1	2	2	1	1	1	0	0
GCA_016926505.1	SC-Methanomicrobia	JAFGOM01	1	1	1	0	0	1	1	1	4	1	0	1	0	0
GCA_903926075.1	SC-Methanomicrobia	CAIYHQ01	1	1	1	0	0	1	2	1	3	1	0	0	0	0
GCA_000017625.1	SC-Methanomicrobia	Methanoregula	1	0	2	0	0	1	1	1	4	1	1	0	0	0
GCA_015660965.1	SC-Methanomicrobia	MVRE01	1	0	1	0	0	1	0	1	1	1	0	0	0	0
GCA_903828975.1	SC-Methanomicrobia	CAIKOD01	1	0	2	0	0	1	1	1	3	2	0	1	0	0
GCA_002509495.1	SC-Methanomicrobia	Methanolinea_A	0	1	1	0	0	0	0	1	3	1	0	2	0	0
GCA_013331415.1	SC-Methanomicrobia	UBA9949	1	1	1	0	0	0	1	1	6	1	1	1	0	0
GCA_017873855.1	SC-Methanomicrobia	Methanolinea_B	1	1	1	0	0	0	1	1	4	1	0	1	0	0
GCA_002503825.1	SC-Methanomicrobia	UBA467	1	1	1	0	0	0	1	1	5	2	1	1	0	0
GCA_001412335.1	SC-Methanomicrobia	SD8	1	1	1	0	0	0	1	2	4	1	0	1	0	0
GCF_000711215.1	SC-Methanomicrobia	Methanomicrobium	1	1	1	0	0	0	0	1	2	1	1	0	0	0
GCF_000784355.1	SC-Methanomicrobia	Methanolacinia	1	0	1	1	0	0	1	1	3	2	1	1	0	0
GCA_002495885.1	SC-Methanomicrobia	UBA148	0	0	0	0	1	1	0	0	1	2	1	0	0	0
GCA_013415795.1	SC-Methanomicrobia	UBA148	0	0	0	0	1	1	0	0	1	1	1	0	0	0
GCA_002010075.1	SC-Methanosarcinia	JdFR-19	0	0	0	0	0	1	1	0	0	1	1	0	0	0
GCA_013330515.1	SC-Methanosarcinia	Methermicoccus	0	0	0	0	0	1	0	1	1	1	1	0	0	0
GCA_002506535.1	SC-Methanosarcinia	Methanothrix_A	0	0	0	0	0	2	1	1	5	1	1	0	0	0
GCA_002501765.1	SC-Methanosarcinia	UBA204	0	0	0	0	0	1	0	1	3	1	1	0	0	0
GCA_013415595.1	SC-Methanosarcinia	JAAEEW01	0	0	0	0	0	1	0	0	2	1	1	0	0	0
GCA_002067795.1	SC-Methanosarcinia	MVQI01	0	0	0	0	0	2	2	1	3	1	0	0	0	0
GCA_000014945.1	SC-Methanosarcinia	Methanothrix_B	0	0	0	0	0	1	2	1	5	1	1	0	0	0
GCA_016927425.1	SC-Methanosarcinia	JAFGMR01	0	0	0	0	0	1	1	1	6	1	1	0	0	0
GCA_003162615.1	SC-Methanosarcinia	Fen-7	0	0	0	0	0	3	1	2	5	2	0	0	0	0
GCA_002506335.1	SC-Methanosarcinia	UBA114	0	0	0	0	0	1	1	1	4	1	0	0	0	0
GCA_002067365.1	SC-Methanosarcinia	Methanothrix	0	0	0	0	0	1	1	1	5	1	1	0	0	0
GCA_013178225.1	SC-Methanosarcinia	JABLXE01	0	0	0	0	0	1	1	1	4	1	1	0	0	0
GCA_905171695.1	SC-Methanosarcinia	EX4572-44	0	0	0	0	0	1	0	1	1	1	1	0	0	0
GCA_004212095.1	SC-Methanosarcinia	Ethanoperedens	0	0	0	0	0	1	0	1	1	1	0	0	0	0
GCA_012962625.1	SC-Methanosarcinia	AMNE-2 UWMA-0185	0	0	0	0	0	1	1	1	1	1	0	0	0	0
GCA_013331375.1	SC-Methanosarcinia	UBA10536	0	0	0	0	1	3	2	0	2	1	0	0	0	0
GCA_003104905.1	SC-Methanosarcinia	Methanoperedens	0	0	0	0	0	1	3	1	1	1	0	0	0	0
GCA_014859785.1	SC-Methanosarcinia	Methanoperedens_A	0	0	0	0	0	1	2	1	2	1	1	0	0	0
GCA_002926195.1	SC-Methanosarcinia	Methanomarinus	0	0	0	0	0	1	0	1	1	1	1	0	0	0
GCA_014859725.1	SC-Methanosarcinia	Kmv04	0	0	0	0	0	1	1	1	1	1	1	0	0	0
GCA_019429385.1	SC-Methanosarcinia	QBUR01	0	0	0	0	0	1	1	1	1	1	1	0	0	0
GCA_009649835.1	SC-Methanosarcinia	Methanocomedens	0	0	0	0	0	1	1	1	2	1	0	0	0	0
GCA_004211975.1	SC-Methanosarcinia	Methanogaster	0	0	0	0	0	1	1	2	1	1	1	0	0	0
GCA_004363215.1	SC-Methanosarcinia	Methanimicrococcus	0	0	1	0	1	1	0	1	1	1	1	0	0	0
GCA_000970085.1	SC-Methanosarcinia	Methanosarcina	0	0	1	0	2	4	1	1	1	2	0	0	0	0
GCA_013329415.1	SC-Methanosarcinia	MTP4	0	0	0	0	2	3	1	1	1	2	1	0	0	0
GCA_000196655.1	SC-Methanosarcinia	Methanohalobium	0	0	0	0	0	1	2	1	1	2	1	0	0	0
GCA_012329085.1	SC-Methanosarcinia	JAAXQB01	1	0	1	0	0	2	1	1	1	1	0	1	0	0
GCA_003555325.1	SC-Methanosarcinia	Methanosalsum	0	0	0	0	0	2	0	1	1	1	0	0	0	0
GCA_016926455.1	SC-Methanosarcinia	JAFGQV01	0	0	0	0	0	1	0	0	4	1	1	0	0	0
ANME-3_HMMV_MAG	SC-Methanosarcinia	ANME-3_HMMV_MAG	0	0	0	0	0	1	2	1	2	1	1	0	0	0
GCA_000306725.1	SC-Methanosarcinia	Methanolobus	0	0	0	0	0	1	1	1	2	1	1	0	0	0
GCA_000328665.1	SC-Methanosarcinia	Methanomethylovorans	0	0	0	0	0	1	1	1	3	1	1	0	0	0
GCA_000013725.1	SC-Methanosarcinia	Methanococcoides	0	0	0	0	0	1	0	1	3	1	1	0	0	0
GCA_021106765.1	SC-Methanosarcinia	JAIOTO01	0	0	0	0	0	1	0	2	1	1	1	0	0	0
GCA_017874375.1	SC-Methanosarcinia	Methanohalophilus	0	0	0	0	0	1	0	1	1	1	0	0	0	0

## Sheet: Sheet3
Supplementary Table3. Methane producing rate and cell proliferation rate of Methanosarcina siciliae E3 and Methanoculleus receptaculi CCAM8130 with different nickel content
CH4 producing rate(μmol/ml·d)				Time(h)
				0	48	96	144	192	240
Methanosarcina siciliae E3	77nM	inoculum size(%)	0.5	0	0.0201517	0.0747139	0.0908665	0.216391	0.22808
			1	0	0.049787	0.1051	0.149088	0.309307	0.289259
			2	0	0.202687	0.30828	0.383599	0.441962	0.415164
			4	0	0.399761	0.52246	0.610544	0.602455	0.484655
			10	0	0.760447	0.701634	0.840259	0.797248	0.631611
	212nM	inoculum size(%)	0.5	0	0.102349	0.294057	1.06322	0.802388	0.636591
			1	0	0.204392	0.309633	0.995508	0.761675	0.614547
			2	0	0.88142	1.23353	0.979107	0.775241	0.614547
			4	0	1.0183	1.33765	1.05906	0.763247	0.604738
			10	0	1.45148	1.48362	1.03591	0.771673	0.608649
	1850nM	inoculum size(%)	0.5	0	0.055965	0.283824	1.00677	0.867387	0.685421
			1	0	0.262865	0.332149	1.01583	0.812118	0.64889
			2	0	1.02536	1.33553	1.05798	0.829174	0.650839
			4	0	1.21297	1.51827	1.10726	0.827052	0.642715
			10	0	1.54483	1.66675	1.08431	0.834801	0.646978
CH4 producing rate(μmol/ml·d)				Time(h)
				0	144	336	576	816	1104
Methanoculleus receptaculi CCAM8130	85nM	inoculum size(%)	0.5	0	0.0060165	0.00574592	0.00470658	0.00589497	0.00780111
			1	0	0.0133333	0.0127076	0.014199	0.0123586	0.0120636
			2	0	0.0308703	0.0242537	0.0271585	0.0225157	0.0184563
			4	0	0.0456413	0.0464325	0.0543538	0.042338	0.0327999
			10	0	0.0800936	0.109946	0.142056	0.118649	0.0907396
	211nM	inoculum size(%)	0.5	0	0.00329796	0.015876	0.0367879	0.055409	0.0466022
			1	0	0.0237483	0.0194685	0.0347582	0.0655241	0.0552372
			2	0	0.0489606	0.0393407	0.0565973	0.0879713	0.0794777
			4	0	0.0930005	0.0900314	0.187036	0.178445	0.142288
			10	0	0.135751	0.165359	0.281247	0.203995	0.144595
	2120nM	inoculum size(%)	0.5	0	0.0111428	0.0159557	0.0310701	0.0607684	0.0565901
			1	0	0.0130219	0.0214363	0.0412452	0.0704137	0.0630909
			2	0	0.0319497	0.0342056	0.0595518	0.0850603	0.0749008
			4	0	0.0537399	0.085249	0.183022	0.16891	0.131424
			10	0	0.185235	0.212308	0.256845	0.198699	0.141443
cell proliferation rate(cells/μL·d)				Time(h)
				0	48	96	144	192	240
Methanosarcina siciliae E3	77nM	inoculum size(%)	0.5	0	2483.83	3891.08	4927.67	8508.25	6650.93
			1	0	3459.17	4686.5	6961.61	9842	7703.77
			2	0	7541.5	8342.25	10350.2	16802.8	13846.4
			4	0	11673.7	12652.9	11609.5	16772.4	14362.3
			10	0	23039.6	17570	17214.6	20731.2	17774.4
	212nM	inoculum size(%)	0.5	0	7693	6440.5	36781.7	27587.6	21130.8
			1	0	13259	11115.4	35503.2	29045.1	23438.7
			2	0	17509.2	38357.2	33094.4	27864	21784.2
			4	0	27017.5	42908	31356.9	27313	22282.3
			10	0	72679.5	56398.2	34974.9	26312.8	20710.9
	1850nM	inoculum size(%)	0.5	0	8541.17	8060.33	38364.8	28329.2	22815.3
			1	0	13751.7	12208.8	36947.6	28400.7	21887.9
			2	0	25791	39905.2	39284.6	28928.8	22711
			4	0	35424.7	43770.4	39564.7	29989	22866.7
			10	0	78688	59263.8	36659.2	28964.9	21376.1
cell proliferation rate(cells/μL·d)				Time(h)
				0	144	336	576	816	1104
Methanoculleus receptaculi CCAM8130	85nM	inoculum size(%)	0.5	0	0	25.5401	19.5312	11.3088	7.90217
			1	0	0	36.978	40.2812	19.152	14.8986
			2	0	0	114.961	90.9826	74.5588	62.4348
			4	0	177.5	261.222	236.962	191.054	136.739
			10	0	314.278	548.178	402.611	304.211	203.293
	211nM	inoculum size(%)	0.5	0	113.435	204.549	342.111	325.922	255.601
			1	0	173.916	261.407	621.739	569.716	440.457
			2	0	308.556	466.355	1167.14	1097.35	799.957
			4	0	684.889	899.613	1333.12	1148.35	855.826
			10	0	1340.94	1886.54	1897.67	1418.38	1017.22
	2120nM	inoculum size(%)	0.5	0	208.208	209.963	371.243	352.971	284.862
			1	0	281.667	282.572	507	529.294	408.225
			2	0	588.167	503.654	964.225	1114.08	803.659
			4	0	771.111	842.279	1261.89	1124.34	818.5
			10	0	2061.39	1968.57	1952.4	1349.53	940.768
###
cell proliferation rate = cell count/time,cell count(cells/μL),time(h)
CH4 producing rate = CH4 production/(culture volume·time), CH4 production(mmol),culture volume = 5mL, time(h)
data in bold format is the maximum value during whole culturing period

## Sheet: Sheet4
Supplementary Table4. Pangenomes of Class II methanogens
Class II common core	description	superclass Methanosarcinia						superclass Methanomicrobia
		core genome	description	accessory genome	description	specific genome	description	core genome	description	accessory genome	description	specific genome	description
OG0000002	Methyltransferase domain	OG0000002	Methyltransferase domain	OG0000764	PFAM regulatory protein, ArsR	OG0001161	Non-catalytic component of the exosome, which is a complex involved in RNA degradation. Increases the RNA binding and the efficiency of RNA degradation. Confers strong poly(A) specificity to the exosome	OG0000001	Tetratricopeptide repeat	OG0000013	Periplasmic copper-binding protein (NosD)	OG0000530	Belongs to the NiFe NiFeSe hydrogenase large subunit family
OG0000004	PFAM 4Fe-4S ferredoxin, iron-sulfur binding domain protein	OG0000004	PFAM 4Fe-4S ferredoxin, iron-sulfur binding domain protein	OG0000009	PBS lyase HEAT domain protein repeat-containing protein	OG0001190	Non-catalytic component of the exosome, which is a complex involved in RNA degradation. Increases the RNA binding and the efficiency of RNA degradation. Helpful for the interaction of the exosome with A-poor RNAs	OG0000002	Methyltransferase domain	OG0000042	Domain of unknown function (DUF1724)	OG0001112	TIGRFAM NiFe hydrogenase maturation protein HypF
OG0000011	Cell division protein 48 (CDC48), domain 2	OG0000011	Cell division protein 48 (CDC48), domain 2	OG0000148	PFAM Cupin 2, conserved barrel domain protein	OG0001194	Catalyzes the ATP- and formate-dependent formylation of 5-aminoimidazole-4-carboxamide-1-beta-d-ribofuranosyl 5'- monophosphate (AICAR) to 5-formaminoimidazole-4-carboxamide-1- beta-d-ribofuranosyl 5'-monophosphate (FAICAR) in the absence of folates	OG0000004	PFAM 4Fe-4S ferredoxin, iron-sulfur binding domain protein	OG0000045	PFAM chemotaxis sensory transducer	OG0001199	PFAM CBS domain containing protein
OG0000022	transferase hexapeptide repeat containing protein	OG0000022	transferase hexapeptide repeat containing protein	OG0000988	adenylyl cyclase CyaB	OG0001215	shikimate kinase activity	OG0000011	Cell division protein 48 (CDC48), domain 2	OG0000114	PFAM CheW domain protein	OG0001127	Predicted membrane protein (DUF2070)
OG0000032	PFAM chaperonin Cpn60 TCP-1	OG0000032	PFAM chaperonin Cpn60 TCP-1	OG0000296	CBS domain containing protein	OG0000828	Flavoprotein	OG0000022	transferase hexapeptide repeat containing protein	OG0000167	Phage integrase family	OG0001392	Domain of unknown function (DUF371)
OG0000035	PFAM Aminotransferase class I and II	OG0000035	PFAM Aminotransferase class I and II	OG0000536	PFAM cyclase family protein	OG0001158	Domain of unknown function (DUF2088)	OG0000024	Universal stress protein family	OG0000176	Fic/DOC family	OG0001004	coenzyme F420-reducing hydrogenase, delta subunit
OG0000036	TIGRFAM geranylgeranyl reductase	OG0000036	TIGRFAM geranylgeranyl reductase	OG0000164	Rubredoxin is a small nonheme, iron protein lacking acid-labile sulfide. Its single Fe, chelated to 4 Cys, functions as an electron acceptor and may also stabilize the conformation of the molecule	OG0001197	Catalytic component of the exosome, which is a complex involved in RNA degradation. Has 3'- 5' exoribonuclease activity. Can also synthesize heteropolymeric RNA-tails	OG0000032	PFAM chaperonin Cpn60 TCP-1	OG0000229	Protein of unknown function (DUF1616)	OG0001134	TIGRFAM hydrogenase expression formation protein HypE
OG0000044	PFAM Glycosyl transferase family 2	OG0000044	PFAM Glycosyl transferase family 2	OG0000271	Cysteine-rich small domain	OG0001220	Non-catalytic component of the exosome, which is a complex involved in RNA degradation. Contributes to the structuring of the Rrp41 active site	OG0000034	PFAM AMP-dependent synthetase and ligase	OG0000283	PD-(D/E)XK nuclease superfamily	OG0001179	TIGRFAM hydrogenase accessory protein HypB
OG0000052	PFAM peptidylprolyl isomerase FKBP-type	OG0000052	PFAM peptidylprolyl isomerase FKBP-type	OG0000951	Catalyzes the addition of molecular CO(2) and H(2)O to ribulose 1,5-bisphosphate (RuBP), generating two molecules of 3- phosphoglycerate (3-PGA). Functions in an archaeal AMP degradation pathway, together with AMP phosphorylase and R15P isomerase	OG0001267	Catalyzes the reversible transfer of the terminal phosphate group between ATP and AMP. Plays an important role in cellular energy homeostasis and in adenine nucleotide metabolism	OG0000035	PFAM Aminotransferase class I and II	OG0000304	COG1132 ABC-type multidrug transport system, ATPase and permease components	OG0001198	TIGRFAM hydrogenase expression formation protein HypD
OG0000054	Thiamine biosynthesis protein ThiC	OG0000054	Thiamine biosynthesis protein ThiC	OG0000178	Chagasin family peptidase inhibitor I42	OG0001272	Predicted RNA-binding protein	OG0000036	TIGRFAM geranylgeranyl reductase	OG0000338	PFAM MCP methyltransferase CheR-type	OG0001005	NADH ubiquinone oxidoreductase 20 kDa subunit
OG0000064	PFAM 4Fe-4S ferredoxin, iron-sulfur binding domain protein	OG0000064	PFAM 4Fe-4S ferredoxin, iron-sulfur binding domain protein	OG0001032	PFAM glutamate synthase alpha subunit domain protein	OG0001299	DHH family	OG0000038	SMART Elongator protein 3 MiaB NifB	OG0000531	-	OG0001277	TIGRFAM hydrogenase assembly chaperone hypC hupF
OG0000065	-	OG0000065	-	OG0000622	Belongs to the UPF0251 family	OG0001246	Catalyzes the interconversion of 2-phosphoglycerate and 3-phosphoglycerate	OG0000044	PFAM Glycosyl transferase family 2	OG0000752	transcription activator, effector binding	OG0001362	PFAM Methionine synthase, vitamin-B12 independent
OG0000068	DeoC/LacD family aldolase	OG0000068	DeoC/LacD family aldolase	OG0000861	Protein of unknown function, DUF255	OG0001189	von Willebrand factor (vWF) type A domain	OG0000052	PFAM peptidylprolyl isomerase FKBP-type	OG0000803	Phosphatidylethanolamine-binding protein	OG0001480	zinc finger, SWIM
OG0000079	TIGRFAM ribosomal-protein-alanine acetyltransferase	OG0000079	TIGRFAM ribosomal-protein-alanine acetyltransferase	OG0001010	PFAM TrkA-C domain protein	OG0001250	RNA binding	OG0000054	Thiamine biosynthesis protein ThiC	OG0000833	-	OG0001494	Belongs to the archaeal adenylate kinase family
OG0000083	TIGRFAM cobalt ABC transporter, inner membrane subunit CbiQ	OG0000083	TIGRFAM cobalt ABC transporter, inner membrane subunit CbiQ	OG0000176	Fic/DOC family	OG0000686	Domain of unknown function	OG0000056	Belongs to the acylphosphatase family	OG0000839	CheC inhibitor of MCP methylation	OG0000025	-
OG0000086	PFAM phosphoesterase, RecJ domain protein	OG0000086	PFAM phosphoesterase, RecJ domain protein	OG0000289	PFAM multi antimicrobial extrusion protein MatE	OG0001262	CDP-alcohol phosphatidyltransferase	OG0000063	Formylmethanofuran dehydrogenase, subunit B	OG0000881	Nitroreductase family	OG0000302	Protein of unknown function (DUF4013)
OG0000129	Zinc phosphodiesterase, which displays some tRNA 3'- processing endonuclease activity. Probably involved in tRNA maturation, by removing a 3'-trailer from precursor tRNA	OG0000129	Zinc phosphodiesterase, which displays some tRNA 3'- processing endonuclease activity. Probably involved in tRNA maturation, by removing a 3'-trailer from precursor tRNA	OG0001099	Respiratory-chain NADH dehydrogenase, 30 Kd subunit	OG0001025	Non-histone chromosomal protein MC1	OG0000064	PFAM 4Fe-4S ferredoxin, iron-sulfur binding domain protein	OG0000929	COG0467 RecA-superfamily ATPases implicated in signal transduction	OG0001490	PFAM amine oxidase
OG0000136	Deoxyhypusine synthase	OG0000136	Deoxyhypusine synthase	OG0001040	Domain related to MnhB subunit of Na+/H+ antiporter	OG0001287	Protein of unknown function (DUF1246)	OG0000065	-	OG0000976	Catalyzes the NAD( )-dependent oxidative deamination of L-alanine to pyruvate, and the reverse reaction, the reductive amination of pyruvate	OG0000883	Flavodoxin
OG0000146	PFAM pyruvate flavodoxin ferredoxin oxidoreductase domain protein	OG0000146	PFAM pyruvate flavodoxin ferredoxin oxidoreductase domain protein	OG0001055	NADH-ubiquinone/plastoquinone oxidoreductase chain 4L	OG0001229	5-methyltetrahydropteroyltriglutamate-homocysteine S-methyltransferase activity	OG0000068	DeoC/LacD family aldolase	OG0001000	Catalyzes the conversion of 3'-phosphate to a 2',3'- cyclic phosphodiester at the end of RNA. The mechanism of action of the enzyme occurs in 3 steps (A) adenylation of the enzyme by ATP	OG0001200	PFAM carbonic anhydrase
OG0000149	RIO1 family	OG0000149	RIO1 family	OG0001092	TIGRFAM monovalent cation proton antiporter, MnhG PhaG subunit	OG0001295	-	OG0000079	TIGRFAM ribosomal-protein-alanine acetyltransferase	OG0001006	Catalyzes the conversion of GDP-D-mannose to GDP-4- dehydro-6-deoxy-D-mannose	OG0001331	-
OG0000150	thiamine pyrophosphate enzyme domain protein TPP-binding	OG0000150	thiamine pyrophosphate enzyme domain protein TPP-binding	OG0001031	Sodium Bile acid symporter family	OG0001248	-	OG0000082	PFAM binding-protein-dependent transport systems inner membrane component	OG0001015	Sporulation protein YtfJ (Spore_YtfJ)	OG0001544	Catalyzes the conversion of inosine 5'-phosphate (IMP) to xanthosine 5'-phosphate (XMP), the first committed and rate- limiting step in the de novo synthesis of guanine nucleotides, and therefore plays an important role in the regulation of cell growth
OG0000154	TIGRFAM pyruvate ketoisovalerate oxidoreductase, gamma subunit	OG0000154	TIGRFAM pyruvate ketoisovalerate oxidoreductase, gamma subunit	OG0001074	Na+/H+ ion antiporter subunit	OG0001297	Aerotolerance regulator N-terminal	OG0000083	TIGRFAM cobalt ABC transporter, inner membrane subunit CbiQ	OG0001043	Zinc-uptake complex component A periplasmic	OG0000959	PFAM PEGA domain
OG0000168	Belongs to the FPP GGPP synthase family	OG0000168	Belongs to the FPP GGPP synthase family	OG0000104	Tetratricopeptide repeat	OG0001340	S-layer protein	OG0000084	PFAM molydopterin dinucleotide-binding region	OG0001045	Uncharacterized protein conserved in archaea (DUF2117)	OG0001417	methanogenesis marker protein 11
OG0000193	PFAM Phosphomethylpyrimidine kinase type-1	OG0000193	PFAM Phosphomethylpyrimidine kinase type-1	OG0000268	-	OG0001247	Segregation and condensation complex subunit ScpB	OG0000086	PFAM phosphoesterase, RecJ domain protein	OG0001143	PFAM HhH-GPD family protein	OG0001448	-
OG0000222	Carbamoyl-phosphate synthetase large chain, oligomerisation	OG0000222	Carbamoyl-phosphate synthetase large chain, oligomerisation	OG0000218	PFAM CobN magnesium chelatase	OG0001265	Necessary for normal cell division and for the maintenance of normal septation	OG0000089	Belongs to the CDP-alcohol phosphatidyltransferase class-I family	OG0001148	PBP superfamily domain	OG0001496	-
OG0000244	Catalyzes the reversible conversion of 2- phosphoglycerate into phosphoenolpyruvate. It is essential for the degradation of carbohydrates via glycolysis	OG0000244	Catalyzes the reversible conversion of 2- phosphoglycerate into phosphoenolpyruvate. It is essential for the degradation of carbohydrates via glycolysis	OG0001342	Flavin containing amine oxidoreductase	OG0001288	Catalyzes the formation of archaetidylethanolamine (PtdEtn) from archaetidylserine (PtdSer)	OG0000092	beta-lactamase domain protein	OG0001208	Probably deamidates glutamine residues to glutamate on methyl-accepting chemotaxis receptors (MCPs), playing an important role in chemotaxis	OG0001515	5-formyltetrahydrofolate cycloligase
OG0000255	Bacterial DNA topoisomeraes I ATP-binding domain	OG0000255	Bacterial DNA topoisomeraes I ATP-binding domain	OG0001261	-	OG0001408	Putative Fe-S cluster	OG0000101	PFAM Xylose isomerase domain protein TIM barrel	OG0001219	Belongs to the UPF0248 family	OG0001560	-
OG0000308	Belongs to the class-I aminoacyl-tRNA synthetase family	OG0000308	Belongs to the class-I aminoacyl-tRNA synthetase family	OG0001286	Uncharacterized conserved protein (DUF2149)	OG0001409	RNA binding	OG0000106	PFAM Glycosyl transferase family 2	OG0001234	Alpha-acetolactate decarboxylase	OG0001588	-
OG0000326	PFAM Aminotransferase class I and II	OG0000326	PFAM Aminotransferase class I and II	OG0001531	Domain of unknown function (DUF366)	OG0001174	Rhomboid family	OG0000116	PFAM glutamate synthase alpha subunit domain protein	OG0001313	Small multi-drug export protein	OG0001590	-
OG0000332	-	OG0000332	-	OG0001102	ADP-specific Phosphofructokinase/Glucokinase conserved region	OG0001227	Myo-inositol-1-phosphate synthase	OG0000123	General factor that plays a role in the activation of archaeal genes transcribed by RNA polymerase. Binds specifically to the TATA box promoter element which lies close to the position of transcription initiation	OG0001376	uridine kinase	OG0000033	Domain of unknown function (DUF3821)
OG0000343	Belongs to the peptidase S16 family	OG0000343	Belongs to the peptidase S16 family	OG0001410	GDP dissociation inhibitor	OG0001269	Iron-sulphur cluster biosynthesis	OG0000129	Zinc phosphodiesterase, which displays some tRNA 3'- processing endonuclease activity. Probably involved in tRNA maturation, by removing a 3'-trailer from precursor tRNA	OG0001431	protein phosphatase 2C domain protein	OG0000805	TIR domain
OG0000352	PFAM aminoacyl-tRNA synthetase class Ib	OG0000352	PFAM aminoacyl-tRNA synthetase class Ib	OG0001670	-	OG0001291	metal ion binding	OG0000133	PFAM CBS domain containing protein	OG0001449	-	OG0000913	PFAM Uncharacterised protein family (UPF0153)
OG0000371	-	OG0000371	-	OG0001678	-	OG0001343	Fumarylacetoacetate (FAA) hydrolase family	OG0000136	Deoxyhypusine synthase	OG0001489	HI0933 family	OG0001078	-
OG0000373	phenylalanyl-tRNA synthetase beta subunit	OG0000373	phenylalanyl-tRNA synthetase beta subunit	OG0000215	Catalyzes the phosphorylation of pyruvate to phosphoenolpyruvate	OG0001289	Type I phosphodiesterase / nucleotide pyrophosphatase	OG0000146	PFAM pyruvate flavodoxin ferredoxin oxidoreductase domain protein	OG0001517	PFAM HhH-GPD family protein	OG0001153	-
OG0000375	PFAM Phosphoribosylglycinamide synthetase	OG0000375	PFAM Phosphoribosylglycinamide synthetase	OG0000231	PFAM Nitrilase cyanide hydratase and apolipoprotein N-acyltransferase	OG0001344	NADH-ubiquinone/plastoquinone oxidoreductase chain 4L	OG0000149	RIO1 family	OG0001561	COG1940 Transcriptional regulator sugar kinase	OG0001202	COG1668 ABC-type Na efflux pump, permease component
OG0000376	Catalyzes the ATP-dependent amination of UTP to CTP with either L-glutamine or ammonia as the source of nitrogen. Regulates intracellular CTP levels through interactions with the four ribonucleotide triphosphates	OG0000376	Catalyzes the ATP-dependent amination of UTP to CTP with either L-glutamine or ammonia as the source of nitrogen. Regulates intracellular CTP levels through interactions with the four ribonucleotide triphosphates	OG0000291	Transcriptional regulator	OG0001385	-	OG0000150	thiamine pyrophosphate enzyme domain protein TPP-binding	OG0001659	PFAM nucleic acid binding, OB-fold, tRNA helicase-type	OG0001310	-
OG0000391	-	OG0000391	-	OG0000969	Peptidase A24A, prepilin type IV	OG0000069	S-layer protein	OG0000154	TIGRFAM pyruvate ketoisovalerate oxidoreductase, gamma subunit	OG0001682	Hydrogenase maturation protease	OG0001315	Uncharacterised conserved protein UCP033563
OG0000411	-	OG0000411	-	OG0000481	Protein of unknown function (DUF541)	OG0001338	-	OG0000156	Formylmethanofuran dehydrogenase subunit A	OG0001746	-	OG0001332	Phosphate transport regulator
OG0000412	Catalyzes the conversion of N5-carboxyaminoimidazole ribonucleotide (N5-CAIR) to 4-carboxy-5-aminoimidazole ribonucleotide (CAIR)	OG0000412	Catalyzes the conversion of N5-carboxyaminoimidazole ribonucleotide (N5-CAIR) to 4-carboxy-5-aminoimidazole ribonucleotide (CAIR)	OG0000147	PFAM 4Fe-4S ferredoxin, iron-sulfur binding domain protein	OG0001403	NADH-ubiquinone/plastoquinone oxidoreductase, chain 3	OG0000158	Produces ATP from ADP in the presence of a proton gradient across the membrane	OG0001769	-	OG0001345	PFAM Radical SAM domain protein
OG0000415	Broad-specificity nucleoside monophosphate (NMP) kinase that catalyzes the reversible transfer of the terminal phosphate group between nucleoside triphosphates and monophosphates	OG0000415	Broad-specificity nucleoside monophosphate (NMP) kinase that catalyzes the reversible transfer of the terminal phosphate group between nucleoside triphosphates and monophosphates	OG0001068	Domain of unknown function (DUF1610)	OG0001442	PINc domain ribonuclease	OG0000168	Belongs to the FPP GGPP synthase family	OG0001788	-	OG0001353	PFAM 4Fe-4S ferredoxin, iron-sulfur binding domain protein
OG0000419	Involved in targeting and insertion of nascent membrane proteins into the cytoplasmic membrane. Acts as a receptor for the complex formed by the signal recognition particle (SRP) and the ribosome-nascent chain (RNC)	OG0000419	Involved in targeting and insertion of nascent membrane proteins into the cytoplasmic membrane. Acts as a receptor for the complex formed by the signal recognition particle (SRP) and the ribosome-nascent chain (RNC)	OG0001051	Protein of unknown function (DUF1624)	OG0001443	NADH-ubiquinone/plastoquinone oxidoreductase chain 6	OG0000183	DEAD DEAH box helicase domain protein	OG0000037	HsdM N-terminal domain	OG0001397	Catalyzes the condensation of 4-aminobenzoate (pABA) with 5-phospho-alpha-D-ribose 1-diphosphate (PRPP) to produce beta-ribofuranosylaminobenzene 5'-phosphate (beta-RFA-P)
OG0000433	Involved in the catabolism of quinolinic acid (QA)	OG0000433	Involved in the catabolism of quinolinic acid (QA)	OG0001075	Rossmann fold nucleotide-binding protein	OG0001444	NADH-ubiquinone/plastoquinone oxidoreductase chain 6	OG0000193	PFAM Phosphomethylpyrimidine kinase type-1	OG0000151	Amino acid permease	OG0001400	COG1502 Phosphatidylserine phosphatidylglycerophosphate cardiolipi n synthases and related enzymes
OG0000434	Specifically catalyzes the NAD or NADP-dependent dehydrogenation of L-aspartate to iminoaspartate	OG0000434	Specifically catalyzes the NAD or NADP-dependent dehydrogenation of L-aspartate to iminoaspartate	OG0000414	TIGRFAM molybdenum ABC transporter, periplasmic molybdate-binding protein	OG0001298	-	OG0000195	Belongs to the V-ATPase 116 kDa subunit family	OG0000245	-	OG0001401	Oxidoreductase
OG0000448	MobA-like NTP transferase domain	OG0000448	MobA-like NTP transferase domain	OG0001094	Transcriptional regulator	OG0001322	Part of a complex that catalyzes the reversible reduction of CoM-S-S-CoB to the thiol-coenzymes H-S-CoM (coenzyme M) and H-S-CoB (coenzyme B). HdrE may be responsible for anchoring the complex to the membrane	OG0000196	Catalyzes the gamma-elimination of phosphate from L- phosphohomoserine and the beta-addition of water to produce L- threonine	OG0000265	PFAM helix-turn-helix HxlR type	OG0001557	-
OG0000451	Protein of unknown function (DUF655)	OG0000451	Protein of unknown function (DUF655)	OG0000042	Domain of unknown function (DUF1724)	OG0001358	-	OG0000197	Catalyzes the radical-mediated transfer of the hydroxybenzyl group from 4-hydroxyphenylpyruvate (HPP) to 5-amino- 6-ribitylamino-2,4(1H,3H)-pyrimidinedione to form 7,8-didemethyl- 8-hydroxy-5-deazariboflavin (FO)	OG0000281	helix_turn_helix multiple antibiotic resistance protein	OG0001559	beta-lactamase domain protein
OG0000452	With S4 and S12 plays an important role in translational accuracy	OG0000452	With S4 and S12 plays an important role in translational accuracy	OG0000151	Amino acid permease	OG0001355	Mo-molybdopterin cofactor metabolic process	OG0000200	PFAM H transporting two-sector ATPase C subunit	OG0000321	Ion transport protein	OG0001587	COG1202 Superfamily II helicase, archaea-specific
OG0000458	Catalyzes the attachment of proline to tRNA(Pro) in a two-step reaction proline is first activated by ATP to form Pro- AMP and then transferred to the acceptor end of tRNA(Pro)	OG0000458	Catalyzes the attachment of proline to tRNA(Pro) in a two-step reaction proline is first activated by ATP to form Pro- AMP and then transferred to the acceptor end of tRNA(Pro)	OG0001036	4Fe-4S ferredoxin, iron-sulfur binding	OG0001191	Stage II sporulation protein M	OG0000207	PFAM bifunctional deaminase-reductase domain protein	OG0000350	COG0589 Universal stress protein UspA and related nucleotide-binding proteins	OG0001592	COG0494 NTP pyrophosphohydrolases including oxidative damage repair enzymes
OG0000483	sites to release the intron. The products are an intron and two tRNA half-molecules bearing 2',3' cyclic phosphate and 5'-OH termini. Recognizes a pseudosymmetric substrate in which 2 bulged loops of 3 bases are separated by a stem of 4 bp	OG0000483	sites to release the intron. The products are an intron and two tRNA half-molecules bearing 2',3' cyclic phosphate and 5'-OH termini. Recognizes a pseudosymmetric substrate in which 2 bulged loops of 3 bases are separated by a stem of 4 bp	OG0001100	4Fe-4S ferredoxin, iron-sulfur binding	OG0001296	Calcineurin-like phosphoesterase superfamily domain	OG0000215	Catalyzes the phosphorylation of pyruvate to phosphoenolpyruvate	OG0000437	Protein of unknown function (DUF1614)	OG0001594	phosphohydrolase (DHH superfamily)
OG0000497	DNA-dependent RNA polymerase catalyzes the transcription of DNA into RNA using the four ribonucleoside triphosphates as substrates	OG0000497	DNA-dependent RNA polymerase catalyzes the transcription of DNA into RNA using the four ribonucleoside triphosphates as substrates	OG0000075	HicA toxin of bacterial toxin-antitoxin,	OG0000100	Protein of unknown function (DUF1699)	OG0000220	Specifically catalyzes the decarboxylation of meso- diaminopimelate (meso-DAP) to L-lysine	OG0000589	CO-methylating acetyl-CoA synthase activity	OG0001617	-
OG0000498	DNA-dependent RNA polymerase catalyzes the transcription of DNA into RNA using the four ribonucleoside triphosphates as substrates	OG0000498	DNA-dependent RNA polymerase catalyzes the transcription of DNA into RNA using the four ribonucleoside triphosphates as substrates	OG0000090	Protein of unknown function DUF86	OG0001142	-	OG0000222	Carbamoyl-phosphate synthetase large chain, oligomerisation	OG0000812	PFAM ABC-1 domain protein	OG0000911	Transcriptional regulators
OG0000499	DNA-dependent RNA polymerase catalyzes the transcription of DNA into RNA using the four ribonucleoside triphosphates as substrates	OG0000499	DNA-dependent RNA polymerase catalyzes the transcription of DNA into RNA using the four ribonucleoside triphosphates as substrates	OG0000693	4Fe-4S ferredoxin, iron-sulfur binding	OG0001407	RNA ligase	OG0000224	phosphoglycerate mutase	OG0000863	toxin activity	OG0001139	integral membrane protein
OG0000500	DNA-dependent RNA polymerase catalyzes the transcription of DNA into RNA using the four ribonucleoside triphosphates as substrates	OG0000500	DNA-dependent RNA polymerase catalyzes the transcription of DNA into RNA using the four ribonucleoside triphosphates as substrates	OG0000977	Prismane/CO dehydrogenase family	OG0001226	haloacid dehalogenase-like hydrolase	OG0000237	transcription termination protein NusA	OG0000964	able to aminoacylate tRNA(Sec) with serine, to form the misacylated tRNA L-seryl-tRNA(Sec), which will be further converted into selenocysteinyl-tRNA(Sec)	OG0001307	-
OG0000504	-	OG0000504	-	OG0001114	Catalyzes the reduction of ribonucleotides to deoxyribonucleotides. May function to provide a pool of deoxyribonucleotide precursors for DNA repair during oxygen limitation and or for immediate growth after restoration of oxygen	OG0000671	TRAM domain	OG0000244	Catalyzes the reversible conversion of 2- phosphoglycerate into phosphoenolpyruvate. It is essential for the degradation of carbohydrates via glycolysis	OG0001021	PFAM Methyltransferase type	OG0001347	PFAM formate nitrite transporter
OG0000507	Molecular chaperone capable of stabilizing a range of proteins. Seems to fulfill an ATP-independent, HSP70-like function in archaeal de novo protein folding	OG0000507	Molecular chaperone capable of stabilizing a range of proteins. Seems to fulfill an ATP-independent, HSP70-like function in archaeal de novo protein folding	OG0001144	TIGRFAM signal peptide peptidase SppA, 36K type	OG0001145	Pyridine nucleotide-disulphide oxidoreductase, dimerisation domain	OG0000249	-	OG0001036	4Fe-4S ferredoxin, iron-sulfur binding	OG0001379	Domain of unknown function (DUF1858)
OG0000526	Belongs to the universal ribosomal protein uS2 family	OG0000526	Belongs to the universal ribosomal protein uS2 family	OG0001093	Multiple resistance and pH regulation protein F (MrpF / PhaF)	OG0001270	FAD linked oxidases, C-terminal domain	OG0000255	Bacterial DNA topoisomeraes I ATP-binding domain	OG0001059	Fe-S protein PflX, homolog of pyruvate formate lyase activating	OG0001493	-
OG0000527	Belongs to the eukaryotic ribosomal protein eL18 family	OG0000527	Belongs to the eukaryotic ribosomal protein eL18 family	OG0000754	PFAM Cys Met metabolism	OG0001326	-	OG0000275	Transcriptional regulator	OG0001100	4Fe-4S ferredoxin, iron-sulfur binding	OG0001556	-
OG0000528	amino acid-binding ACT domain protein	OG0000528	amino acid-binding ACT domain protein	OG0000980	Glycosyl hydrolase family 57	OG0001360	-	OG0000278	IGPS catalyzes the conversion of PRFAR and glutamine to IGP, AICAR and glutamate. The HisF subunit catalyzes the cyclization activity that produces IGP and AICAR from PRFAR using the ammonia provided by the HisH subunit	OG0001124	-	OG0001614	PFAM ABC transporter
OG0000548	ribosomal protein S15	OG0000548	ribosomal protein S15	OG0001467	HMGL-like	OG0001405	Lycopene cyclase protein	OG0000300	Possesses two activities a DNA synthesis (polymerase) and an exonucleolytic activity that degrades single-stranded DNA in the 3'- to 5'-direction. Has a template-primer preference which is characteristic of a replicative DNA polymerase	OG0001125	-	OG0001619	-
OG0000551	Catalyzes the attachment of glutamate to tRNA(Glu) in a two-step reaction glutamate is first activated by ATP to form Glu-AMP and then transferred to the acceptor end of tRNA(Glu)	OG0000551	Catalyzes the attachment of glutamate to tRNA(Glu) in a two-step reaction glutamate is first activated by ATP to form Glu-AMP and then transferred to the acceptor end of tRNA(Glu)	OG0001436	MotA/TolQ/ExbB proton channel family	OG0001440	AAA domain (Cdc48 subfamily)	OG0000307	Catalyzes the sequential NAD-dependent oxidations of L- histidinol to L-histidinaldehyde and then to L-histidine	OG0001128	TIGRFAM mannose-1-phosphate guanylyltransferase mannose-6-phosphate isomerase	OG0001620	-
OG0000554	Plays an important role in the de novo pathway of purine nucleotide biosynthesis. Catalyzes the first committed step in the biosynthesis of AMP from IMP	OG0000554	Plays an important role in the de novo pathway of purine nucleotide biosynthesis. Catalyzes the first committed step in the biosynthesis of AMP from IMP	OG0001437	GTPase that associates with the 50S ribosomal subunit and may have a role during protein synthesis or ribosome biogenesis	OG0001446	-	OG0000308	Belongs to the class-I aminoacyl-tRNA synthetase family	OG0001135	-	OG0001647	-
OG0000556	Belongs to the eukaryotic ribosomal protein eS1 family	OG0000556	Belongs to the eukaryotic ribosomal protein eS1 family	OG0001671	Uncharacterized protein conserved in archaea (DUF2209)	OG0001458	Protein of unknown function (DUF434)	OG0000316	May play a key role in the regulation of the intracellular concentration of adenosylhomocysteine	OG0001152	Iron-storage protein	OG0001648	-
OG0000559	Belongs to the universal ribosomal protein uL16 family	OG0000559	Belongs to the universal ribosomal protein uL16 family	OG0001628	4Fe-4S single cluster domain	OG0000618	Domain of unknown function DUF11	OG0000318	Diphthamide synthase	OG0001256	Protein of unknown function (DUF432)	OG0001650	PFAM ABC transporter
OG0000566	Joins adenosylcobinamide-GDP and alpha-ribazole to generate adenosylcobalamin (Ado-cobalamin). Also synthesizes adenosylcobalamin 5'-phosphate from adenosylcobinamide-GDP and alpha-ribazole 5'-phosphate	OG0000566	Joins adenosylcobinamide-GDP and alpha-ribazole to generate adenosylcobalamin (Ado-cobalamin). Also synthesizes adenosylcobalamin 5'-phosphate from adenosylcobinamide-GDP and alpha-ribazole 5'-phosphate	OG0001672	archaeal coiled-coil protein	OG0001502	-	OG0000319	-	OG0001305	Archaebacterial flagellin	OG0001651	-
OG0000572	Major role in the synthesis of nucleoside triphosphates other than ATP. The ATP gamma phosphate is transferred to the NDP beta phosphate via a ping-pong mechanism, using a phosphorylated active-site intermediate	OG0000572	Major role in the synthesis of nucleoside triphosphates other than ATP. The ATP gamma phosphate is transferred to the NDP beta phosphate via a ping-pong mechanism, using a phosphorylated active-site intermediate	OG0001719	-	OG0001341	Metallo-beta-lactamase superfamily	OG0000325	Belongs to the class-III pyridoxal-phosphate-dependent aminotransferase family	OG0001432	-	OG0001657	-
OG0000573	Responsible for synthesis of pseudouridine from uracil- 54 and uracil-55 in the psi GC loop of transfer RNAs	OG0000573	Responsible for synthesis of pseudouridine from uracil- 54 and uracil-55 in the psi GC loop of transfer RNAs	OG0000639	Uroporphyrinogen-III synthase HemD	OG0001357	-	OG0000326	PFAM Aminotransferase class I and II	OG0001433	membrane protein (DUF2178)	OG0001658	-
OG0000574	PFAM RNA polymerase Rpb4	OG0000574	PFAM RNA polymerase Rpb4	OG0000987	Metal dependent phosphohydrolases with conserved 'HD' motif.	OG0001359	NYN domain	OG0000332	-	OG0001455	Archaeal flagellar protein F	OG0000250	Flagellin is the subunit protein which polymerizes to form the filaments of archaeal flagella
OG0000577	binds to the 23S rRNA	OG0000577	binds to the 23S rRNA	OG0000384	8-oxoguanine DNA glycosylase domain protein	OG0001412	Has ATPase and non-specific DNA-binding activities	OG0000343	Belongs to the peptidase S16 family	OG0001485	-	OG0001087	-
OG0000578	TIGRFAM ribosomal protein L30P	OG0000578	TIGRFAM ribosomal protein L30P	OG0000048	type II secretion system protein	OG0001469	eRF1 domain 2	OG0000352	PFAM aminoacyl-tRNA synthetase class Ib	OG0001506	PFAM ribonuclease II	OG0001223	PFAM Aminotransferase class I and II
OG0000579	This is one of the proteins that binds and probably mediates the attachment of the 5S RNA into the large ribosomal subunit, where it forms part of the central protuberance	OG0000579	This is one of the proteins that binds and probably mediates the attachment of the 5S RNA into the large ribosomal subunit, where it forms part of the central protuberance	OG0000097	PFAM type II secretion system protein E	OG0001501	F420H2 dehydrogenase subunit FpoO	OG0000353	Catalyzes the condensation of 2 ATP molecules into cyclic di-AMP (c-di-AMP), a	OG0001653	Protein of unknown function (DUF3467)	OG0001304	COG0467 RecA-superfamily ATPases implicated in signal transduction
OG0000580	binds to the 23S rRNA	OG0000580	binds to the 23S rRNA	OG0000128	Rhodanese-like domain	OG0001511	-	OG0000354	Belongs to the MCM family	OG0001697	-	OG0001308	-
OG0000581	PFAM Ribosomal protein	OG0000581	PFAM Ribosomal protein	OG0000948	Glutaredoxin	OG0001290	Radical SAM superfamily	OG0000356	PFAM Aminotransferase class I and II	OG0001703	-	OG0001367	PFAM major facilitator superfamily MFS_1
OG0000585	Belongs to the PDCD5 family	OG0000585	Belongs to the PDCD5 family	OG0001050	-	OG0001325	Pyridine nucleotide-disulphide oxidoreductase	OG0000358	This protein promotes the GTP-dependent binding of aminoacyl-tRNA to the A-site of ribosomes during protein biosynthesis	OG0001784	-	OG0001430	beta-lactamase domain protein
OG0000586	Belongs to the eukaryotic ribosomal protein eL31 family	OG0000586	Belongs to the eukaryotic ribosomal protein eL31 family	OG0000185	Belongs to the sodium solute symporter (SSF) (TC 2.A.21) family	OG0001575	-	OG0000363	Catalyzes the NAD(P)H-dependent reduction of dihydroxyacetonephosphate (DHAP or glycerone phosphate) to glycerol 1-phosphate (G1P). The G1P thus generated is used as the glycerophosphate backbone of phospholipids in the cellular membranes of Archaea	OG0001833	-	OG0001461	PFAM thioesterase superfamily
OG0000587	adenyl ribonucleotide binding	OG0000587	adenyl ribonucleotide binding	OG0001046	PFAM pyruvate flavodoxin ferredoxin oxidoreductase domain protein	OG0001249	Catalyzes the reduction of 1-pyrroline-5-carboxylate (PCA) to L-proline	OG0000369	Belongs to the carbohydrate kinase PfkB family	OG0000075	HicA toxin of bacterial toxin-antitoxin,	OG0001519	-
OG0000606	Part of ribonuclease P, a protein complex that generates mature tRNA molecules by cleaving their 5'-ends	OG0000606	Part of ribonuclease P, a protein complex that generates mature tRNA molecules by cleaving their 5'-ends	OG0001105	-	OG0001381	-	OG0000371	-	OG0000090	Protein of unknown function DUF86	OG0001591	Stage II sporulation protein M
OG0000609	Belongs to the universal ribosomal protein uS9 family	OG0000609	Belongs to the universal ribosomal protein uS9 family	OG0001084	Pyruvate flavodoxin ferredoxin oxidoreductase domain protein	OG0001232	S-adenosyl-l-methionine hydroxide adenosyltransferase	OG0000373	phenylalanyl-tRNA synthetase beta subunit	OG0000289	PFAM multi antimicrobial extrusion protein MatE	OG0001618	UDP-glucose:hexose-1-phosphate uridylyltransferase activity
OG0000610	This protein is one of the early assembly proteins of the 50S ribosomal subunit, although it is not seen to bind rRNA by itself. It is important during the early stages of 50S assembly	OG0000610	This protein is one of the early assembly proteins of the 50S ribosomal subunit, although it is not seen to bind rRNA by itself. It is important during the early stages of 50S assembly	OG0001110	Mediates influx of magnesium ions	OG0001393	-	OG0000375	PFAM Phosphoribosylglycinamide synthetase	OG0000299	NUDIX domain	OG0001646	-
OG0000008	PFAM NADPH-dependent FMN reductase	OG0000008	PFAM NADPH-dependent FMN reductase	OG0000283	PD-(D/E)XK nuclease superfamily	OG0001452	PspA/IM30 family	OG0000376	Catalyzes the ATP-dependent amination of UTP to CTP with either L-glutamine or ammonia as the source of nitrogen. Regulates intracellular CTP levels through interactions with the four ribonucleotide triphosphates	OG0000310	PFAM ATPase associated with various cellular activities, AAA_3	OG0001649	-
OG0000019	Proton-conducting membrane transporter	OG0000019	Proton-conducting membrane transporter	OG0000812	PFAM ABC-1 domain protein	OG0001438	Sodium:solute symporter family	OG0000378	An RNase that has 5'-3' exonuclease activity. May be involved in RNA degradation	OG0000406	Thiamine pyrophosphate enzyme, N-terminal TPP binding domain	OG0001654	PFAM oxidoreductase nitrogenase, component 1
OG0000030	Belongs to the small heat shock protein (HSP20) family	OG0000030	Belongs to the small heat shock protein (HSP20) family	OG0000379	NnrU protein	OG0001481	-	OG0000388	PFAM dihydropteroate synthase, DHPS	OG0000693	4Fe-4S ferredoxin, iron-sulfur binding	OG0001698	-
OG0000031	PFAM ABC transporter related	OG0000031	PFAM ABC transporter related	OG0001193	4Fe-4S ferredoxin iron-sulfur binding domain protein	OG0001499	RNA-binding protein of the translin family	OG0000391	-	OG0000842	DNA polymerase Ligase (LigD)	OG0001705	Domain of unknown function (DUF1917)
OG0000047	part of an ABC transporter complex. Responsible for energy coupling to the transport system	OG0000047	part of an ABC transporter complex. Responsible for energy coupling to the transport system	OG0001171	Polymer-forming cytoskeletal	OG0000888	Lrp/AsnC ligand binding domain	OG0000393	TIGRFAM TraB family protein	OG0000910	Alcohol dehydrogenase GroES-like domain	OG0001707	-
OG0000067	Ferrous iron transport B domain protein	OG0000067	Ferrous iron transport B domain protein	OG0001164	-	OG0001441	PFAM glutamate synthase alpha subunit	OG0000396	Belongs to the ATCase OTCase family	OG0000977	Prismane/CO dehydrogenase family	OG0000958	Short repeat of unknown function (DUF308)
OG0000085	ABC transporter, substrate-binding protein, aliphatic	OG0000085	ABC transporter, substrate-binding protein, aliphatic	OG0000998	PFAM MgtE integral membrane region	OG0001468	Clp protease	OG0000401	Component of the wyosine derivatives biosynthesis pathway that catalyzes the condensation of N-methylguanine with 2 carbon atoms from pyruvate to form the tricyclic 4-demethylwyosine (imG-14) on guanosine-37 of tRNA(Phe)	OG0001001	DGC domain	OG0001133	AAA domain, putative AbiEii toxin, Type IV TA system
OG0000088	Part of the energy-coupling factor (ECF) transporter complex CbiMNOQ involved in cobalt import	OG0000088	Part of the energy-coupling factor (ECF) transporter complex CbiMNOQ involved in cobalt import	OG0001065	Bacterial regulatory helix-turn-helix protein, lysR family	OG0001498	MgtC family	OG0000404	Directs the termination of nascent peptide synthesis (translation) in response to the termination codons UAA, UAG and UGA	OG0001029	UbiA prenyltransferase family	OG0001321	Protein of unknown function (DUF1622)
OG0000111	Phosphoglucomutase phosphomannomutase alpha beta alpha domain I	OG0000111	Phosphoglucomutase phosphomannomutase alpha beta alpha domain I	OG0001192	CGGC	OG0001500	Protein of unknown function (DUF3467)	OG0000405	PFAM Aminotransferase class I and II	OG0001049	Specifically catalyzes the beta-elimination of phosphate from L-phosphoserine and the beta-addition of sulfite to the dehydroalanine intermediate to produce L-cysteate	OG0001419	DEAD DEAH box helicase
OG0000119	UbiA prenyltransferase family	OG0000119	UbiA prenyltransferase family	OG0001451	Glycogen debranching enzyme N terminal		-	OG0000411	-	OG0001062	PFAM YHS domain	OG0001456	Chemotaxis signal transduction system protein F from archaea
OG0000192	KH, type 1, domain	OG0000192	KH, type 1, domain	OG0001532	Isocitrate/isopropylmalate dehydrogenase		-	OG0000412	Catalyzes the conversion of N5-carboxyaminoimidazole ribonucleotide (N5-CAIR) to 4-carboxy-5-aminoimidazole ribonucleotide (CAIR)	OG0001089	Domain of unknown function (DUF1805)	OG0001462	COG0467 RecA-superfamily ATPases implicated in signal transduction
OG0000201	methyltransferase	OG0000201	methyltransferase	OG0001636	Galactose-1-phosphate uridyl transferase, N-terminal domain		-	OG0000413	signal transduction protein with CBS domains	OG0001099	Respiratory-chain NADH dehydrogenase, 30 Kd subunit	OG0001495	Probably functions as a manganese efflux pump
OG0000202	PFAM nucleic acid binding, OB-fold, tRNA helicase-type	OG0000202	PFAM nucleic acid binding, OB-fold, tRNA helicase-type	OG0000106	PFAM Glycosyl transferase family 2		-	OG0000415	Broad-specificity nucleoside monophosphate (NMP) kinase that catalyzes the reversible transfer of the terminal phosphate group between nucleoside triphosphates and monophosphates	OG0001109	DNA polymerase elongation subunit (Family B)	OG0001538	Mitochondrial small ribosomal subunit Rsm22
OG0000212	Converts O-phospho-L-seryl-tRNA(Cys) (Sep-tRNA(Cys)) to L-cysteinyl-tRNA(Cys) (Cys-tRNA(Cys))	OG0000212	Converts O-phospho-L-seryl-tRNA(Cys) (Sep-tRNA(Cys)) to L-cysteinyl-tRNA(Cys) (Cys-tRNA(Cys))	OG0000912	PFAM Radical SAM domain protein		-	OG0000419	Involved in targeting and insertion of nascent membrane proteins into the cytoplasmic membrane. Acts as a receptor for the complex formed by the signal recognition particle (SRP) and the ribosome-nascent chain (RNC)	OG0001114	Catalyzes the reduction of ribonucleotides to deoxyribonucleotides. May function to provide a pool of deoxyribonucleotide precursors for DNA repair during oxygen limitation and or for immediate growth after restoration of oxygen	OG0001550	Anaerobic ribonucleoside-triphosphate reductase
OG0000248	D-isomer specific 2-hydroxyacid dehydrogenase catalytic	OG0000248	D-isomer specific 2-hydroxyacid dehydrogenase catalytic	OG0000934	Pyruvate kinase, alpha/beta domain		-	OG0000421	-	OG0001126	-	OG0001638	Uncharacterized protein, homolog of nitrogen regulatory protein PII
OG0000252	Catalyzes the condensation of iminoaspartate with dihydroxyacetone phosphate to form quinolinate	OG0000252	Catalyzes the condensation of iminoaspartate with dihydroxyacetone phosphate to form quinolinate	OG0001044	PFAM asparagine synthase		-	OG0000422	PFAM PilT protein domain protein	OG0001151	SpoVT / AbrB like domain	OG0001702	Belongs to the small heat shock protein (HSP20) family
OG0000290	Removes the N-terminal methionine from nascent proteins. The N-terminal methionine is often cleaved when the second residue in the primary sequence is small and uncharged (Met-Ala-, Cys, Gly, Pro, Ser, Thr, or Val)	OG0000290	Removes the N-terminal methionine from nascent proteins. The N-terminal methionine is often cleaved when the second residue in the primary sequence is small and uncharged (Met-Ala-, Cys, Gly, Pro, Ser, Thr, or Val)	OG0000227	Transcriptional		-	OG0000425	Membrane protein of unknown function DUF63	OG0001163	Amino acid ABC transporter substrate-binding protein, PAAT family	OG0001747	-
OG0000323	Belongs to the LarC family	OG0000323	Belongs to the LarC family	OG0001038	PFAM TatD-related deoxyribonuclease		-	OG0000429	Belongs to the class-I aminoacyl-tRNA synthetase family	OG0001181	Helix-hairpin-helix domain	OG0001749	-
OG0000331	PP-loop domain protein	OG0000331	PP-loop domain protein	OG0001077	PFAM BioY protein		-	OG0000433	Involved in the catabolism of quinolinic acid (QA)	OG0001278	PFAM deoxyribose-phosphate aldolase phospho-2-dehydro-3-deoxyheptonate aldolase	OG0001753	-
OG0000345	Responsible for channeling the electrons from the oxidation of dihydroorotate from the FMN redox center in the PyrD type B subunit to the ultimate electron acceptor NAD( )	OG0000345	Responsible for channeling the electrons from the oxidation of dihydroorotate from the FMN redox center in the PyrD type B subunit to the ultimate electron acceptor NAD( )	OG0000762	DEAD DEAH box helicase domain protein		-	OG0000434	Specifically catalyzes the NAD or NADP-dependent dehydrogenation of L-aspartate to iminoaspartate	OG0001327	DNA methylase	OG0001755	-
OG0000347	Phosphoribosylaminoimidazolesuccinocarboxamide synthase	OG0000347	Phosphoribosylaminoimidazolesuccinocarboxamide synthase	OG0001080	Domain of unknown function DUF123		-	OG0000445	Belongs to the eukaryotic ribosomal protein eS24 family	OG0001346	Putative redox-active protein (C_GCAxxG_C_C)		-
OG0000349	DEAD DEAH box helicase domain protein	OG0000349	DEAD DEAH box helicase domain protein	OG0000994	Domain of unknown function (DUF1890)		-	OG0000447	cytidyltransferase-related domain	OG0001375	ATP-NAD AcoX kinase		-
OG0000359	-	OG0000359	-	OG0001090	Uncharacterized conserved protein (DUF2196)		-	OG0000448	MobA-like NTP transferase domain	OG0001429	-		-
OG0000368	Carbohydrate kinase	OG0000368	Carbohydrate kinase	OG0000155	by modhmm		-	OG0000451	Protein of unknown function (DUF655)	OG0001537	NfeD-like C-terminal, partner-binding		-
OG0000400	Belongs to the argininosuccinate synthase family. Type 1 subfamily	OG0000400	Belongs to the argininosuccinate synthase family. Type 1 subfamily	OG0000162	PFAM alpha beta hydrolase fold		-	OG0000452	With S4 and S12 plays an important role in translational accuracy	OG0001563	membrane		-
OG0000431	Catalyzes the condensation of (S)-aspartate-beta- semialdehyde (S)-ASA and pyruvate to 4-hydroxy- tetrahydrodipicolinate (HTPA)	OG0000431	Catalyzes the condensation of (S)-aspartate-beta- semialdehyde (S)-ASA and pyruvate to 4-hydroxy- tetrahydrodipicolinate (HTPA)	OG0000453	PFAM Radical SAM domain protein		-	OG0000455	Domain of unknown function (DUF814)	OG0001621	LexA-binding, inner membrane-associated putative hydrolase		-
OG0000435	Catalyzes the attachment of O-phosphoserine (Sep) to tRNA(Cys)	OG0000435	Catalyzes the attachment of O-phosphoserine (Sep) to tRNA(Cys)	OG0000989	Belongs to the UPF0758 family		-	OG0000456	-	OG0001699	-		-
OG0000439	-	OG0000439	-	OG0001103	RNase_H superfamily		-	OG0000458	Catalyzes the attachment of proline to tRNA(Pro) in a two-step reaction proline is first activated by ATP to form Pro- AMP and then transferred to the acceptor end of tRNA(Pro)	OG0001728	Phosphate-starvation-inducible E		-
OG0000461	-	OG0000461	-	OG0001052	Mitochondrial biogenesis AIM24		-	OG0000466	homoserine dehydrogenase	OG0001752	-		-
OG0000463	Component of the proteasome core, a large protease complex with broad specificity involved in protein degradation	OG0000463	Component of the proteasome core, a large protease complex with broad specificity involved in protein degradation	OG0001143	PFAM HhH-GPD family protein		-	OG0000470	RNA methylase	OG0001827	-		-
OG0000473	Catalyzes the reversible conversion of ribose-5- phosphate to ribulose 5-phosphate	OG0000473	Catalyzes the reversible conversion of ribose-5- phosphate to ribulose 5-phosphate	OG0000910	Alcohol dehydrogenase GroES-like domain		-	OG0000483	sites to release the intron. The products are an intron and two tRNA half-molecules bearing 2',3' cyclic phosphate and 5'-OH termini. Recognizes a pseudosymmetric substrate in which 2 bulged loops of 3 bases are separated by a stem of 4 bp	OG0001865	Respiratory-chain NADH dehydrogenase, 30 Kd subunit		-
OG0000476	Catalyzes the conversion of 4-hydroxy- tetrahydrodipicolinate (HTPA) to tetrahydrodipicolinate	OG0000476	Catalyzes the conversion of 4-hydroxy- tetrahydrodipicolinate (HTPA) to tetrahydrodipicolinate	OG0001159	PFAM Major Facilitator Superfamily		-	OG0000485	Catalyzes the reversible reduction of methenyl- H(4)MPT( ) to methylene-H(4)MPT	OG0000153	PFAM Cache, type 2 domain protein		-
OG0000484	Belongs to the metallo-dependent hydrolases superfamily. DHOase family. Class I DHOase subfamily	OG0000484	Belongs to the metallo-dependent hydrolases superfamily. DHOase family. Class I DHOase subfamily	OG0001175	Putative heavy-metal-binding		-	OG0000490	Belongs to the class-II aminoacyl-tRNA synthetase family. Phe-tRNA synthetase alpha subunit type 2 subfamily	OG0000230	Bacterial regulatory proteins, tetR family		-
OG0000509	Translation initiation factor 2 alpha subunit	OG0000509	Translation initiation factor 2 alpha subunit	OG0001076	TIGRFAM ATP-dependent DNA helicase, RecQ		-	OG0000497	DNA-dependent RNA polymerase catalyzes the transcription of DNA into RNA using the four ribonucleoside triphosphates as substrates	OG0000260	protein conserved in archaea		-
OG0000515	-	OG0000515	-	OG0001130	-		-	OG0000498	DNA-dependent RNA polymerase catalyzes the transcription of DNA into RNA using the four ribonucleoside triphosphates as substrates	OG0000379	NnrU protein		-
OG0000521	PFAM Di-trans-poly-cis-decaprenylcistransferase	OG0000521	PFAM Di-trans-poly-cis-decaprenylcistransferase	OG0001281	Calcineurin-like phosphoesterase superfamily domain		-	OG0000499	DNA-dependent RNA polymerase catalyzes the transcription of DNA into RNA using the four ribonucleoside triphosphates as substrates	OG0000390	TIGRFAM lysine 2,3-aminomutase YodO family protein		-
OG0000522	PFAM Shwachman-Bodian-Diamond syndrome	OG0000522	PFAM Shwachman-Bodian-Diamond syndrome	OG0000468	Sulfurtransferase TusA		-	OG0000500	DNA-dependent RNA polymerase catalyzes the transcription of DNA into RNA using the four ribonucleoside triphosphates as substrates	OG0000397	Protein of unknown function DUF58		-
OG0000524	PFAM amidohydrolase	OG0000524	PFAM amidohydrolase	OG0000341	Hydantoinase/oxoprolinase N-terminal region		-	OG0000504	-	OG0000517	PFAM TrkA-N domain protein		-
OG0000550	Domain of unknown function (DUF373)	OG0000550	Domain of unknown function (DUF373)	OG0001471	Appr-1'-p processing enzyme		-	OG0000505	Could be responsible for synthesis of pseudouridine from uracil-55 in the psi GC loop of transfer RNAs	OG0000800	Transcriptional regulator PadR-like family		-
OG0000567	One of the primary rRNA binding proteins, it binds directly to 16S rRNA where it nucleates assembly of the head domain of the 30S subunit. Is located at the subunit interface close to the decoding center	OG0000567	One of the primary rRNA binding proteins, it binds directly to 16S rRNA where it nucleates assembly of the head domain of the 30S subunit. Is located at the subunit interface close to the decoding center	OG0001264	CAAX protease self-immunity		-	OG0000506	Binds to the 50S ribosomal subunit and prevents its association with the 30S ribosomal subunit to form the 70S initiation complex	OG0000851	Does not function as a glutathione-disulfide oxidoreductase in the presence of glutathione and glutathione reductase. Has low thioredoxin activity in vitro		-
OG0000568	PFAM ribosomal protein L7Ae L30e S12e Gadd45	OG0000568	PFAM ribosomal protein L7Ae L30e S12e Gadd45	OG0001569	Predicted transporter (DUF2162)		-	OG0000507	Molecular chaperone capable of stabilizing a range of proteins. Seems to fulfill an ATP-independent, HSP70-like function in archaeal de novo protein folding	OG0000885	META domain		-
OG0000575	Specifically dimethylates two adjacent adenosines in the loop of a conserved hairpin near the 3'-end of 16S rRNA in the 30S particle. May play a critical role in biogenesis of 30S subunits	OG0000575	Specifically dimethylates two adjacent adenosines in the loop of a conserved hairpin near the 3'-end of 16S rRNA in the 30S particle. May play a critical role in biogenesis of 30S subunits	OG0001372	-		-	OG0000510	TIGRFAM histone acetyltransferase, ELP3 family	OG0001008	PFAM Radical SAM domain protein		-
OG0000582	Belongs to the cytidylate kinase family. Type 2 subfamily	OG0000582	Belongs to the cytidylate kinase family. Type 2 subfamily	OG0001568	-		-	OG0000519	PFAM SufBD protein	OG0001019	WxcM-like, C-terminal		-
OG0000592	ATP-dependent agmatine transferase that catalyzes the formation of 2-agmatinylcytidine (agm2C) at the wobble position (C34) of tRNA(Ile2), converting the codon specificity from AUG to AUA	OG0000592	ATP-dependent agmatine transferase that catalyzes the formation of 2-agmatinylcytidine (agm2C) at the wobble position (C34) of tRNA(Ile2), converting the codon specificity from AUG to AUA	OG0001384	-		-	OG0000525	Belongs to the MEMO1 family	OG0001028	TIGRFAM cell division ATPase MinD		-
OG0000600	PFAM aminotransferase class V	OG0000600	PFAM aminotransferase class V	OG0001534	-		-	OG0000526	Belongs to the universal ribosomal protein uS2 family	OG0001034	Glyoxalase-like domain		-
OG0000619	Involved in targeting and insertion of nascent membrane proteins into the cytoplasmic membrane. Binds directly to 7S RNA and mediates binding of the 54 kDa subunit of the SRP	OG0000619	Involved in targeting and insertion of nascent membrane proteins into the cytoplasmic membrane. Binds directly to 7S RNA and mediates binding of the 54 kDa subunit of the SRP	OG0000369	Belongs to the carbohydrate kinase PfkB family		-	OG0000527	Belongs to the eukaryotic ribosomal protein eL18 family	OG0001079	Acetyltransferase (GNAT) domain		-
OG0000631	-	OG0000631	-	OG0000971	-		-	OG0000528	amino acid-binding ACT domain protein	OG0001113	extracellular matrix structural constituent		-
OG0000645	With S4 and S5 plays an important role in translational accuracy. Located at the interface of the 30S and 50S subunits	OG0000645	With S4 and S5 plays an important role in translational accuracy. Located at the interface of the 30S and 50S subunits	OG0000113	Site-specific tyrosine recombinase, which acts by catalyzing the cutting and rejoining of the recombining DNA molecules		-	OG0000530	Belongs to the NiFe NiFeSe hydrogenase large subunit family	OG0001122	Protein of unknown function (DUF2953)		-
OG0000678	Catalyzes the formation of 6,7-dimethyl-8- ribityllumazine by condensation of 5-amino-6-(D- ribitylamino)uracil with 3,4-dihydroxy-2-butanone 4-phosphate. This is the penultimate step in the biosynthesis of riboflavin	OG0000678	Catalyzes the formation of 6,7-dimethyl-8- ribityllumazine by condensation of 5-amino-6-(D- ribitylamino)uracil with 3,4-dihydroxy-2-butanone 4-phosphate. This is the penultimate step in the biosynthesis of riboflavin	OG0000322	coenzyme F420 hydrogenase dehydrogenase beta subunit domain protein		-	OG0000541	D-aminoacyl-tRNA deacylase with broad substrate specificity. By recycling D-aminoacyl-tRNA to D-amino acids and free tRNA molecules, this enzyme counteracts the toxicity associated with the formation of D-aminoacyl-tRNA entities in vivo	OG0001193	4Fe-4S ferredoxin iron-sulfur binding domain protein		-
OG0000016	MacB-like periplasmic core domain	OG0000016	MacB-like periplasmic core domain	OG0001012	NIF3 (NGG1p interacting factor 3)		-	OG0000546	PFAM metallophosphoesterase	OG0001253	DNA repair enzyme involved in the repair of deaminated bases. Selectively cleaves double-stranded DNA at the second phosphodiester bond 3' to a deoxyinosine leaving behind the intact lesion on the nicked DNA		-
OG0000017	ATPases associated with a variety of cellular activities	OG0000017	ATPases associated with a variety of cellular activities	OG0000320	Uncharacterised protein family UPF0058		-	OG0000548	ribosomal protein S15	OG0001254	Acetyl xylan esterase (AXE1)		-
OG0000039	PFAM Carboxymuconolactone decarboxylase	OG0000039	PFAM Carboxymuconolactone decarboxylase	OG0000978	Proton pump that utilizes the energy of pyrophosphate hydrolysis as the driving force for proton movement across the membrane. Generates a proton motive force		-	OG0000551	Catalyzes the attachment of glutamate to tRNA(Glu) in a two-step reaction glutamate is first activated by ATP to form Glu-AMP and then transferred to the acceptor end of tRNA(Glu)	OG0001260	Domain of unknown function (DUF4040)		-
OG0000071	Catalyzes the isomerization between 2-isopropylmalate and 3-isopropylmalate, via the formation of 2-isopropylmaleate	OG0000071	Catalyzes the isomerization between 2-isopropylmalate and 3-isopropylmalate, via the formation of 2-isopropylmaleate	OG0000241	-		-	OG0000554	Plays an important role in the de novo pathway of purine nucleotide biosynthesis. Catalyzes the first committed step in the biosynthesis of AMP from IMP	OG0001275	PQ loop repeat		-
OG0000074	Catalyzes the isomerization between 2-isopropylmalate and 3-isopropylmalate, via the formation of 2-isopropylmaleate	OG0000074	Catalyzes the isomerization between 2-isopropylmalate and 3-isopropylmalate, via the formation of 2-isopropylmaleate	OG0000303	Belongs to the LDH MDH superfamily		-	OG0000556	Belongs to the eukaryotic ribosomal protein eS1 family	OG0001351	COG0477 Permeases of the major facilitator superfamily		-
OG0000091	Catalyzes the ferredoxin-dependent oxidative decarboxylation of arylpyruvates	OG0000091	Catalyzes the ferredoxin-dependent oxidative decarboxylation of arylpyruvates	OG0001016	Belongs to the HMG-CoA reductase family		-	OG0000557	-	OG0001453	-		-
OG0000124	PFAM ABC transporter	OG0000124	PFAM ABC transporter	OG0000909	SMART Elongator protein 3 MiaB NifB		-	OG0000559	Belongs to the universal ribosomal protein uL16 family	OG0001477	-		-
OG0000130	CoB--CoM heterodisulfide reductase subunit B	OG0000130	CoB--CoM heterodisulfide reductase subunit B	OG0000023	TIGRFAM archaeal flagellin N-terminal-like domain		-	OG0000562	eIF-2 functions in the early steps of protein synthesis by forming a ternary complex with GTP and initiator tRNA	OG0001487	NurA		-
OG0000191	Protein of unknown function (DUF2551)	OG0000191	Protein of unknown function (DUF2551)	OG0001104	CRS1_YhbY		-	OG0000566	Joins adenosylcobinamide-GDP and alpha-ribazole to generate adenosylcobalamin (Ado-cobalamin). Also synthesizes adenosylcobalamin 5'-phosphate from adenosylcobinamide-GDP and alpha-ribazole 5'-phosphate	OG0001548	-		-
OG0000254	PFAM sugar isomerase (SIS)	OG0000254	PFAM sugar isomerase (SIS)	OG0000837	Predicted metal-binding protein (DUF2284)		-	OG0000569	HTH-type transcriptional regulatory protein	OG0001549	-		-
OG0000305	Phosphorylase superfamily	OG0000305	Phosphorylase superfamily	OG0000211	Enoyl-(Acyl carrier protein) reductase		-	OG0000570	SMART Peptidase A22, presenilin signal peptide	OG0001603	PFAM Roadblock LC7 family protein		-
OG0000315	PFAM peptidase M24	OG0000315	PFAM peptidase M24	OG0000836	PFAM Cobalt transport protein		-	OG0000571	Multifunctional RNA-binding protein that recognizes the K-turn motif in ribosomal RNA, the RNA component of RNase P, box H ACA, box C D and box C' D' sRNAs	OG0001634	Ferredoxin		-
OG0000387	PFAM AIR synthase related protein	OG0000387	PFAM AIR synthase related protein	OG0000338	PFAM MCP methyltransferase CheR-type		-	OG0000572	Major role in the synthesis of nucleoside triphosphates other than ATP. The ATP gamma phosphate is transferred to the NDP beta phosphate via a ping-pong mechanism, using a phosphorylated active-site intermediate	OG0001684	Auxin Efflux Carrier		-
OG0000416	PFAM Thiolase	OG0000416	PFAM Thiolase	OG0000265	PFAM helix-turn-helix HxlR type		-	OG0000573	Responsible for synthesis of pseudouridine from uracil- 54 and uracil-55 in the psi GC loop of transfer RNAs	OG0001704	-		-
OG0000417	archaeal Zn-finger protein	OG0000417	archaeal Zn-finger protein	OG0000321	Ion transport protein		-	OG0000574	PFAM RNA polymerase Rpb4	OG0001725	Sulphur transport		-
OG0000438	Belongs to the IlvD Edd family	OG0000438	Belongs to the IlvD Edd family	OG0001152	Iron-storage protein		-	OG0000577	binds to the 23S rRNA	OG0001726	Sulphur transport		-
OG0000440	Belongs to the aspartokinase family	OG0000440	Belongs to the aspartokinase family	OG0001024	PemK-like, MazF-like toxin of type II toxin-antitoxin system		-	OG0000578	TIGRFAM ribosomal protein L30P	OG0001830	Belongs to the class-II aminoacyl-tRNA synthetase family		-
OG0000449	glycine hydroxymethyltransferase activity	OG0000449	glycine hydroxymethyltransferase activity	OG0000050	Transcriptional regulator		-	OG0000579	This is one of the proteins that binds and probably mediates the attachment of the 5S RNA into the large ribosomal subunit, where it forms part of the central protuberance	OG0001889	4Fe-4S dicluster domain		-
OG0000459	PFAM peptidase M50	OG0000459	PFAM peptidase M50	OG0001218	4Fe-4S binding domain		-	OG0000580	binds to the 23S rRNA	OG0001936	-		-
OG0000462	Belongs to the lyase 1 family. Adenylosuccinate lyase subfamily	OG0000462	Belongs to the lyase 1 family. Adenylosuccinate lyase subfamily	OG0001154	Phosphoribosyl transferase domain		-	OG0000581	PFAM Ribosomal protein	OG0001951	-		-
OG0000508	Belongs to the peptidase M50B family	OG0000508	Belongs to the peptidase M50B family	OG0000012	Probable transposase		-	OG0000584	Protein of unknown function (DUF521)	OG0000057	Domain of unknown function (DUF4143)		-
OG0000520	TGS domain protein	OG0000520	TGS domain protein	OG0000157	Oligopeptide/dipeptide transporter, C-terminal region		-	OG0000585	Belongs to the PDCD5 family	OG0000170	Aldehyde ferredoxin oxidoreductase, N-terminal domain		-
OG0000535	Catalyzes the interconversion of methylthioribose-1- phosphate (MTR-1-P) into methylthioribulose-1-phosphate (MTRu-1- P)	OG0000535	Catalyzes the interconversion of methylthioribose-1- phosphate (MTR-1-P) into methylthioribulose-1-phosphate (MTRu-1- P)	OG0000160	Bacterial extracellular solute-binding proteins, family 5 Middle		-	OG0000586	Belongs to the eukaryotic ribosomal protein eL31 family	OG0000337	PFAM TM2 domain containing protein		-
OG0000603	PFAM triphosphoribosyl-dephospho-CoA protein	OG0000603	PFAM triphosphoribosyl-dephospho-CoA protein	OG0001196	Cytochrome C biogenesis protein transmembrane region		-	OG0000587	adenyl ribonucleotide binding	OG0000512	Sodium/calcium exchanger protein		-
OG0000627	TIGRFAM Sua5 YciO YrdC YwlC family protein	OG0000627	TIGRFAM Sua5 YciO YrdC YwlC family protein	OG0000936	AAA domain (dynein-related subfamily)		-	OG0000594	protein conserved in archaea	OG0000862	PFAM Yip1 domain		-
OG0000630	archaeal coiled-coil protein	OG0000630	archaeal coiled-coil protein	OG0001386	PEP-utilising enzyme, TIM barrel domain		-	OG0000599	Belongs to the UPF0179 family	OG0001024	PemK-like, MazF-like toxin of type II toxin-antitoxin system		-
OG0000670	-	OG0000670	-	OG0000917	Winged helix-turn-helix		-	OG0000604	Belongs to the UPF0434 family	OG0001042	Gar1/Naf1 RNA binding region		-
OG0000681	Molecular chaperone capable of stabilizing a range of proteins. Seems to fulfill an ATP-independent, HSP70-like function in archaeal de novo protein folding	OG0000681	Molecular chaperone capable of stabilizing a range of proteins. Seems to fulfill an ATP-independent, HSP70-like function in archaeal de novo protein folding	OG0001063	WD40-like Beta Propeller Repeat		-	OG0000606	Part of ribonuclease P, a protein complex that generates mature tRNA molecules by cleaving their 5'-ends	OG0001083	ABC-type transport system involved in lipoprotein release permease component		-
OG0000714	Functions by promoting the formation of the first peptide bond	OG0000714	Functions by promoting the formation of the first peptide bond	OG0001470	NADH:flavin oxidoreductase / NADH oxidase family		-	OG0000607	Involved in the biosynthesis of isoprenoids. Catalyzes the 1,3-allylic rearrangement of the homoallylic substrate isopentenyl (IPP) to its allylic isomer, dimethylallyl diphosphate (DMAPP)	OG0001116	Ppx GppA phosphatase		-
OG0000720	PFAM PUA domain containing protein	OG0000720	PFAM PUA domain containing protein	OG0001627	TatD related DNase		-	OG0000608	-	OG0001144	TIGRFAM signal peptide peptidase SppA, 36K type		-
OG0000747	Part of ribonuclease P, a protein complex that generates mature tRNA molecules by cleaving their 5'-ends	OG0000747	Part of ribonuclease P, a protein complex that generates mature tRNA molecules by cleaving their 5'-ends	OG0001673	S4 RNA-binding domain		-	OG0000609	Belongs to the universal ribosomal protein uS9 family	OG0001165	DNA polymerase elongation subunit (Family B)		-
OG0000748	Belongs to the eukaryotic ribosomal protein eL15 family	OG0000748	Belongs to the eukaryotic ribosomal protein eL15 family	OG0001157	Acetyltransferase (GNAT) domain		-	OG0000610	This protein is one of the early assembly proteins of the 50S ribosomal subunit, although it is not seen to bind rRNA by itself. It is important during the early stages of 50S assembly	OG0001171	Polymer-forming cytoskeletal		-
OG0000108	PFAM regulatory protein AsnC Lrp family	OG0000108	PFAM regulatory protein AsnC Lrp family	OG0001695	Type I phosphodiesterase / nucleotide pyrophosphatase		-	OG0000623	Transcription elongation factor Spt5	OG0001207	PFAM proteinase inhibitor I4 serpin		-
OG0000145	PFAM metal-dependent phosphohydrolase, HD sub domain	OG0000145	PFAM metal-dependent phosphohydrolase, HD sub domain	OG0001497	Protein of unknown function (DUF356)		-	OG0000624	Forms part of the ribosomal stalk which helps the ribosome interact with GTP-bound translation factors	OG0001224	-		-
OG0000173	heterodisulfide reductase subunit C	OG0000173	heterodisulfide reductase subunit C	OG0001761	-		-	OG0000628	Produces ATP from ADP in the presence of a proton gradient across the membrane	OG0001245	PFAM Malic enzyme, NAD binding domain		-
OG0000205	PFAM Tetrahydromethanopterin S-methyltransferase MtrH subunit	OG0000205	PFAM Tetrahydromethanopterin S-methyltransferase MtrH subunit	OG0001767	-		-	OG0000640	TIGRFAM DNA-directed RNA polymerase	OG0001283	Serine Threonine protein kinase		-
OG0000263	Protein of unknown function DUF116	OG0000263	Protein of unknown function DUF116	OG0001676	Cytochrome C assembly protein		-	OG0000641	Belongs to the UPF0218 family	OG0001306	-		-
OG0000443	PFAM Radical SAM domain protein	OG0000443	PFAM Radical SAM domain protein	OG0001266	COG1138 Cytochrome c biogenesis factor		-	OG0000642	PFAM CBS domain containing protein	OG0001312	Membrane bound hydrogenase		-
OG0000475	-	OG0000475	-	OG0001801	-		-	OG0000643	Converts GTP to 7,8-dihydro-D-neopterin 2',3'-cyclic phosphate, the first intermediate in the biosynthesis of coenzyme methanopterin	OG0001319	PspC domain		-
OG0000477	structural constituent of ribosome	OG0000477	structural constituent of ribosome	OG0001856	Methyltransferase domain		-	OG0000648	Function in general translation initiation by promoting the binding of the formylmethionine-tRNA to ribosomes. Seems to function along with eIF-2	OG0001398	Creatinase/Prolidase N-terminal domain		-
OG0000560	Catalyzes the formation of phosphoribosylamine from phosphoribosylpyrophosphate (PRPP) and glutamine	OG0000560	Catalyzes the formation of phosphoribosylamine from phosphoribosylpyrophosphate (PRPP) and glutamine	OG0001060	-		-	OG0000649	Belongs to the eukaryotic ribosomal protein eL21 family	OG0001402	Nicotinic acid phosphoribosyltransferase		-
OG0000633	PIN domain of ribonuclease	OG0000633	PIN domain of ribonuclease	OG0000232	Flavin reductase like domain		-	OG0000650	-	OG0001439	Domain of unknown function (DUF4349)		-
OG0000673	-	OG0000673	-	OG0000261	Pyridoxamine 5'-phosphate oxidase		-	OG0000654	This protein binds to the 23S rRNA, and is important in its secondary structure. It is located near the subunit interface in the base of the L7 L12 stalk, and near the tRNA binding site of the peptidyltransferase center	OG0001447	Catalyzes the phosphorylation of the hydroxyl group of 4-methyl-5-beta-hydroxyethylthiazole (THZ)		-
OG0000685	-	OG0000685	-	OG0000992	PFAM conserved		-	OG0000655	One of the primary rRNA binding proteins, it binds directly to 16S rRNA central domain where it helps coordinate assembly of the platform of the 30S subunit	OG0001473	PFAM D12 class N6 adenine-specific DNA methyltransferase		-
OG0000690	DNA-dependent RNA polymerase catalyzes the transcription of DNA into RNA using the four ribonucleoside triphosphates as substrates	OG0000690	DNA-dependent RNA polymerase catalyzes the transcription of DNA into RNA using the four ribonucleoside triphosphates as substrates	OG0001070	-		-	OG0000656	-	OG0001476	Produces ATP from ADP in the presence of a proton gradient across the membrane		-
OG0000704	eIF-2 functions in the early steps of protein synthesis by forming a ternary complex with GTP and initiator tRNA	OG0000704	eIF-2 functions in the early steps of protein synthesis by forming a ternary complex with GTP and initiator tRNA	OG0000972	Rubrerythrin		-	OG0000661	Ribosomal proteins 50S-L18Ae/60S-L20/60S-L18A	OG0001484	Thioredoxin		-
OG0000787	Contacts the emerging nascent chain on the ribosome	OG0000787	Contacts the emerging nascent chain on the ribosome	OG0000115	PFAM Methyltransferase type		-	OG0000662	Catalyzes the hydrolysis of the adenine ring of phosphoribosyl-AMP	OG0001509	Holliday junction DNA helicase ruvB C-terminus		-
OG0000791	PFAM ribosomal protein S8E	OG0000791	PFAM ribosomal protein S8E	OG0000340	UDP-N-acetylglucosamine 2-epimerase		-	OG0000668	Involved in DNA repair and in homologous recombination. May regulate the cleavage reactions of the branch-structured DNA. Has a very weak ATPase activity that is not stimulated by DNA. Binds DNA but does not promote DNA strands exchange	OG0001516	PFAM ABC transporter		-
OG0000795	Helix-turn-helix domain protein	OG0000795	Helix-turn-helix domain protein	OG0001160	Probably involved in the biogenesis of the ribosome		-	OG0000677	Involved in the regulation of the intracellular balance of NAD and NADP, and is a key enzyme in the biosynthesis of NADP. Catalyzes specifically the phosphorylation on 2'-hydroxyl of the adenosine moiety of NAD to yield NADP	OG0001521	PFAM Pyridoxamine 5'-phosphate		-
OG0000095	formylmethanofuran dehydrogenase, subunit E	OG0000095	formylmethanofuran dehydrogenase, subunit E	OG0001072	Thioesterase superfamily		-	OG0000680	Catalyzes the reversible phosphorylation of UMP to UDP	OG0001540	RuvA, C-terminal domain		-
OG0000360	PFAM Imidazoleglycerol-phosphate dehydratase	OG0000360	PFAM Imidazoleglycerol-phosphate dehydratase	OG0001088	Conserved region in glutamate synthase		-	OG0000682	Catalyzes the formation of isopentenyl diphosphate (IPP), the building block of all isoprenoids	OG0001553	Catalyzes the reversible transfer of the terminal phosphate of ATP to form a long-chain polyphosphate (polyP)		-
OG0000488	chorismate mutase	OG0000488	chorismate mutase	OG0000881	Nitroreductase family		-	OG0000695	Dimethylates a single guanine residue at position 26 of a number of tRNAs using S-adenosyl-L-methionine as donor of the methyl groups	OG0001558	FHA domain containing protein		-
OG0000696	Protein-export membrane protein SecD	OG0000696	Protein-export membrane protein SecD	OG0000842	DNA polymerase Ligase (LigD)		-	OG0000708	Large family of predicted nucleotide-binding domains	OG0001570	AI-2E family transporter		-
OG0000697	Involved in protein export	OG0000697	Involved in protein export	OG0001029	UbiA prenyltransferase family		-	OG0000711	Belongs to the UPF0147 family	OG0001604	-		-
OG0000763	PFAM PUA domain containing protein	OG0000763	PFAM PUA domain containing protein	OG0001245	PFAM Malic enzyme, NAD binding domain		-	OG0000722	Belongs to the eukaryotic ribosomal protein eS4 family	OG0001616	Molybdate transporter of MFS superfamily		-
OG0000093	hydrophobe amphiphile efflux-3 (HAE3) family	OG0000093	hydrophobe amphiphile efflux-3 (HAE3) family	OG0001054	Uncharacterized protein conserved in archaea (DUF2180)		-	OG0000728	DNA-dependent RNA polymerase catalyzes the transcription of DNA into RNA using the four ribonucleoside triphosphates as substrates	OG0001639	Crossover junction endodeoxyribonuclease RuvC		-
OG0000292	Elongator protein 3 MiaB NifB	OG0000292	Elongator protein 3 MiaB NifB	OG0001276	-		-	OG0000729	Located on the platform of the 30S subunit	OG0001708	-		-
OG0000049	extracellular matrix structural constituent	OG0000049	extracellular matrix structural constituent	OG0001416	Belongs to the pyruvate kinase family		-	OG0000730	One of the primary rRNA binding proteins, it binds directly to 16S rRNA where it nucleates assembly of the body of the 30S subunit	OG0001727	ATPase activity		-
OG0000051	4Fe-4S dicluster domain	OG0000051	4Fe-4S dicluster domain	OG0001173	Glycosyl hydrolases family 15		-	OG0000731	Located at the top of the head of the 30S subunit, it contacts several helices of the 16S rRNA. In the 70S ribosome it contacts the 23S rRNA (bridge B1a) and protein L5 of the 50S subunit (bridge B1b), connecting the 2 subunits	OG0001831	Zinc-ribbon containing domain		-
OG0000553	Exchanges the guanine residue with 7-cyano-7- deazaguanine (preQ0) at position 15 in the dihydrouridine loop (D- loop) of archaeal tRNAs	OG0000553	Exchanges the guanine residue with 7-cyano-7- deazaguanine (preQ0) at position 15 in the dihydrouridine loop (D- loop) of archaeal tRNAs	OG0001203	Transglutaminase-like superfamily		-	OG0000764	PFAM regulatory protein, ArsR	OG0001877	-		-
OG0000864	PFAM AMMECR1 domain protein	OG0000864	PFAM AMMECR1 domain protein	OG0001574	Xylose isomerase-like TIM barrel		-	OG0000770	Protein of unknown function (DUF357)	OG0001884	helicase activity		-
OG0000144	Part of a complex that catalyzes the formation of methyl-coenzyme M and tetrahydromethanopterin from coenzyme M and methyl-tetrahydromethanopterin. This is an energy-conserving, sodium-ion translocating step	OG0000144	Part of a complex that catalyzes the formation of methyl-coenzyme M and tetrahydromethanopterin from coenzyme M and methyl-tetrahydromethanopterin. This is an energy-conserving, sodium-ion translocating step	OG0001631	protein conserved in archaea		-	OG0000773	Promotes the exchange of GDP for GTP in EF-1-alpha GDP, thus allowing the regeneration of EF-1-alpha GTP that could then be used to form the ternary complex EF-1-alpha GTP AAtRNA	OG0001925	-		-
OG0000001	Tetratricopeptide repeat	OG0000310	PFAM ATPase associated with various cellular activities, AAA_3	OG0000165	-		-	OG0000775	Transcription elongation factor Spt4	OG0001948	PFAM respiratory-chain NADH dehydrogenase, subunit 1		-
OG0000024	Universal stress protein family	OG0001026	Belongs to the class-I aminoacyl-tRNA synthetase family	OG0001599	integral membrane protein		-	OG0000813	H subunit	OG0001949	PFAM NiFe -hydrogenase-3-type complex Eha, membrane protein EhaH		-
OG0000034	PFAM AMP-dependent synthetase and ligase	OG0001161	Non-catalytic component of the exosome, which is a complex involved in RNA degradation. Increases the RNA binding and the efficiency of RNA degradation. Confers strong poly(A) specificity to the exosome	OG0001632	-		-	OG0000820	RNase L inhibitor, RLI	OG0001950	Predicted membrane protein (DUF2109)		-
OG0000056	Belongs to the acylphosphatase family	OG0001190	Non-catalytic component of the exosome, which is a complex involved in RNA degradation. Increases the RNA binding and the efficiency of RNA degradation. Helpful for the interaction of the exosome with A-poor RNAs	OG0000984	Transposase IS200 like		-	OG0000825	Binds 16S rRNA, required for the assembly of 30S particles	OG0001982	-		-
OG0000063	Formylmethanofuran dehydrogenase, subunit B	OG0001194	Catalyzes the ATP- and formate-dependent formylation of 5-aminoimidazole-4-carboxamide-1-beta-d-ribofuranosyl 5'- monophosphate (AICAR) to 5-formaminoimidazole-4-carboxamide-1- beta-d-ribofuranosyl 5'-monophosphate (FAICAR) in the absence of folates	OG0001336	PFAM regulatory protein, ArsR		-	OG0000835	Class II Aldolase and Adducin N-terminal domain	OG0001994	PFAM NiFe -hydrogenase-3-type complex Eha, EhaM		-
OG0000084	PFAM molydopterin dinucleotide-binding region	OG0000001	Tetratricopeptide repeat	OG0001387	to GB L77117 SP Q58031 PID 1591324 percent identity		-	OG0000859	Transcription factor Pcc1	OG0001995	-		-
OG0000089	Belongs to the CDP-alcohol phosphatidyltransferase class-I family	OG0000024	Universal stress protein family	OG0001777	Glycogen synthase		-	OG0000872	PFAM metallophosphoesterase	OG0001996	Predicted membrane protein (DUF2105)		-
OG0000101	PFAM Xylose isomerase domain protein TIM barrel	OG0000034	PFAM AMP-dependent synthetase and ligase	OG0001530	CcmE		-	OG0000889	-	OG0001997	PFAM NiFe -hydrogenase-3-type complex Eha, membrane protein EhaF		-
OG0000207	PFAM bifunctional deaminase-reductase domain protein	OG0000056	Belongs to the acylphosphatase family	OG0001858	-		-	OG0000907	Catalyzes the stereoinversion of LL-2,6- diaminoheptanedioate (L,L-DAP) to meso-diaminoheptanedioate (meso- DAP), a precursor of L-lysine	OG0001998	NiFe -hydrogenase-3-type complex Eha, membrane protein EhaE		-
OG0000220	Specifically catalyzes the decarboxylation of meso- diaminopimelate (meso-DAP) to L-lysine	OG0000063	Formylmethanofuran dehydrogenase, subunit B	OG0001870	4Fe-4S double cluster binding domain		-	OG0001112	TIGRFAM NiFe hydrogenase maturation protein HypF	OG0000198	Beta-Ig-H3 fasciclin		-
OG0000224	phosphoglycerate mutase	OG0000084	PFAM molydopterin dinucleotide-binding region	OG0001908	CcmB protein		-	OG0001199	PFAM CBS domain containing protein	OG0000243	COG1002 Type II restriction enzyme, methylase subunits		-
OG0000237	transcription termination protein NusA	OG0000089	Belongs to the CDP-alcohol phosphatidyltransferase class-I family	OG0001913	-		-	OG0000000	Histidine kinase-, DNA gyrase B-, and HSP90-like ATPase	OG0000529	Papain family cysteine protease		-
OG0000275	Transcriptional regulator	OG0000101	PFAM Xylose isomerase domain protein TIM barrel	OG0000467	Citrate transporter		-	OG0000006	PFAM ABC transporter related	OG0000612	Pentapeptide repeats (9 copies)		-
OG0000300	Possesses two activities a DNA synthesis (polymerase) and an exonucleolytic activity that degrades single-stranded DNA in the 3'- to 5'-direction. Has a template-primer preference which is characteristic of a replicative DNA polymerase	OG0000207	PFAM bifunctional deaminase-reductase domain protein	OG0000846	Helix-turn-helix domain		-	OG0000008	PFAM NADPH-dependent FMN reductase	OG0000613	PFAM NHL repeat containing protein		-
OG0000316	May play a key role in the regulation of the intracellular concentration of adenosylhomocysteine	OG0000220	Specifically catalyzes the decarboxylation of meso- diaminopimelate (meso-DAP) to L-lysine	OG0000878	PFAM methyl-viologen-reducing hydrogenase delta subunit		-	OG0000009	PBS lyase HEAT domain protein repeat-containing protein	OG0000751	-		-
OG0000325	Belongs to the class-III pyridoxal-phosphate-dependent aminotransferase family	OG0000224	phosphoglycerate mutase	OG0001118	-		-	OG0000018	PFAM NAD-dependent epimerase dehydratase	OG0000979	SNARE associated Golgi protein		-
OG0000354	Belongs to the MCM family	OG0000237	transcription termination protein NusA	OG0000214	PFAM transcriptional regulator TrmB		-	OG0000019	Proton-conducting membrane transporter	OG0000985	AAA ATPase domain		-
OG0000358	This protein promotes the GTP-dependent binding of aminoacyl-tRNA to the A-site of ribosomes during protein biosynthesis	OG0000275	Transcriptional regulator	OG0000968	Yip1 domain		-	OG0000030	Belongs to the small heat shock protein (HSP20) family	OG0001023	COG1680 Beta-lactamase class C and other penicillin binding proteins		-
OG0000363	Catalyzes the NAD(P)H-dependent reduction of dihydroxyacetonephosphate (DHAP or glycerone phosphate) to glycerol 1-phosphate (G1P). The G1P thus generated is used as the glycerophosphate backbone of phospholipids in the cellular membranes of Archaea	OG0000300	Possesses two activities a DNA synthesis (polymerase) and an exonucleolytic activity that degrades single-stranded DNA in the 3'- to 5'-direction. Has a template-primer preference which is characteristic of a replicative DNA polymerase	OG0001172	metallopeptidase activity		-	OG0000031	PFAM ABC transporter related	OG0001030	HEPN domain		-
OG0000388	PFAM dihydropteroate synthase, DHPS	OG0000316	May play a key role in the regulation of the intracellular concentration of adenosylhomocysteine	OG0001062	PFAM YHS domain		-	OG0000040	PFAM Nitroreductase	OG0001040	Domain related to MnhB subunit of Na+/H+ antiporter		-
OG0000393	TIGRFAM TraB family protein	OG0000325	Belongs to the class-III pyridoxal-phosphate-dependent aminotransferase family	OG0000230	Bacterial regulatory proteins, tetR family		-	OG0000043	Thioredoxin	OG0001055	NADH-ubiquinone/plastoquinone oxidoreductase chain 4L		-
OG0000396	Belongs to the ATCase OTCase family	OG0000354	Belongs to the MCM family	OG0000337	PFAM TM2 domain containing protein		-	OG0000047	part of an ABC transporter complex. Responsible for energy coupling to the transport system	OG0001092	TIGRFAM monovalent cation proton antiporter, MnhG PhaG subunit		-
OG0000401	Component of the wyosine derivatives biosynthesis pathway that catalyzes the condensation of N-methylguanine with 2 carbon atoms from pyruvate to form the tricyclic 4-demethylwyosine (imG-14) on guanosine-37 of tRNA(Phe)	OG0000358	This protein promotes the GTP-dependent binding of aminoacyl-tRNA to the A-site of ribosomes during protein biosynthesis	OG0001183	PFAM cobalamin synthesis protein P47K		-	OG0000055	MoeA domain protein domain I and II	OG0001093	Multiple resistance and pH regulation protein F (MrpF / PhaF)		-
OG0000404	Directs the termination of nascent peptide synthesis (translation) in response to the termination codons UAA, UAG and UGA	OG0000363	Catalyzes the NAD(P)H-dependent reduction of dihydroxyacetonephosphate (DHAP or glycerone phosphate) to glycerol 1-phosphate (G1P). The G1P thus generated is used as the glycerophosphate backbone of phospholipids in the cellular membranes of Archaea	OG0001239	PFAM ABC transporter related		-	OG0000058	DNA methylase	OG0001159	PFAM Major Facilitator Superfamily		-
OG0000405	PFAM Aminotransferase class I and II	OG0000388	PFAM dihydropteroate synthase, DHPS	OG0000247	Protein of unknown function DUF86		-	OG0000067	Ferrous iron transport B domain protein	OG0001168	PFAM Histidine kinase-, DNA gyrase B-, and HSP90-like ATPase		-
OG0000413	signal transduction protein with CBS domains	OG0000393	TIGRFAM TraB family protein	OG0001178	Serine dehydrogenase proteinase		-	OG0000085	ABC transporter, substrate-binding protein, aliphatic	OG0001175	Putative heavy-metal-binding		-
OG0000421	-	OG0000396	Belongs to the ATCase OTCase family	OG0001373	PFAM DsrE family protein		-	OG0000087	iron dependent repressor	OG0001183	PFAM cobalamin synthesis protein P47K		-
OG0000429	Belongs to the class-I aminoacyl-tRNA synthetase family	OG0000401	Component of the wyosine derivatives biosynthesis pathway that catalyzes the condensation of N-methylguanine with 2 carbon atoms from pyruvate to form the tricyclic 4-demethylwyosine (imG-14) on guanosine-37 of tRNA(Phe)	OG0001584	FeoA		-	OG0000088	Part of the energy-coupling factor (ECF) transporter complex CbiMNOQ involved in cobalt import	OG0001212	Domain of unknown function (DUF333)		-
OG0000445	Belongs to the eukaryotic ribosomal protein eS24 family	OG0000404	Directs the termination of nascent peptide synthesis (translation) in response to the termination codons UAA, UAG and UGA	OG0000181	-		-	OG0000111	Phosphoglucomutase phosphomannomutase alpha beta alpha domain I	OG0001222	MafB19-like deaminase		-
OG0000447	cytidyltransferase-related domain	OG0000405	PFAM Aminotransferase class I and II	OG0001255	haloacid dehalogenase-like hydrolase		-	OG0000117	Molybdopterin oxidoreductase Fe4S4 domain	OG0001233	small GTP-binding protein		-
OG0000455	Domain of unknown function (DUF814)	OG0000413	signal transduction protein with CBS domains	OG0001225	-		-	OG0000118	PFAM NADH-ubiquinone oxidoreductase, chain 49kDa	OG0001239	PFAM ABC transporter related		-
OG0000456	-	OG0000421	-	OG0001611	FAD binding domain		-	OG0000119	UbiA prenyltransferase family	OG0001279	Permease		-
OG0000466	homoserine dehydrogenase	OG0000429	Belongs to the class-I aminoacyl-tRNA synthetase family	OG0001812	protein conserved in archaea		-	OG0000122	protein conserved in archaea	OG0001303	PFAM Fe-S cluster domain protein		-
OG0000470	RNA methylase	OG0000445	Belongs to the eukaryotic ribosomal protein eS24 family	OG0001813	membrane		-	OG0000139	MoaE protein	OG0001460	-		-
OG0000485	Catalyzes the reversible reduction of methenyl- H(4)MPT( ) to methylene-H(4)MPT	OG0000447	cytidyltransferase-related domain	OG0001779	Thiamine-binding protein		-	OG0000140	PFAM Rubrerythrin	OG0001505	Condenses 4-methyl-5-(beta-hydroxyethyl)thiazole monophosphate (THZ-P) and 2-methyl-4-amino-5-hydroxymethyl pyrimidine pyrophosphate (HMP-PP) to form thiamine monophosphate (TMP)		-
OG0000490	Belongs to the class-II aminoacyl-tRNA synthetase family. Phe-tRNA synthetase alpha subunit type 2 subfamily	OG0000455	Domain of unknown function (DUF814)	OG0001809	Functions in trans to edit the amino acid moiety from		-	OG0000141	PFAM NADH ubiquinone oxidoreductase 20 kDa subunit	OG0001508	binds to the 23S rRNA		-
OG0000505	Could be responsible for synthesis of pseudouridine from uracil-55 in the psi GC loop of transfer RNAs	OG0000456	-	OG0001820	Catalyzes the NADPH-dependent reduction of L-glutamate 5-phosphate into L-glutamate 5-semialdehyde and phosphate. The product spontaneously undergoes cyclization to form 1-pyrroline-5- carboxylate		-	OG0000148	PFAM Cupin 2, conserved barrel domain protein	OG0001518	PFAM von Willebrand factor type A		-
OG0000506	Binds to the 50S ribosomal subunit and prevents its association with the 30S ribosomal subunit to form the 70S initiation complex	OG0000466	homoserine dehydrogenase	OG0001860	Methylenetetrahydrofolate reductase		-	OG0000159	PFAM Oligosaccharyl transferase STT3 subunit	OG0001525	PFAM phospholipase D Transphosphatidylase		-
OG0000525	Belongs to the MEMO1 family	OG0000470	RNA methylase	OG0001797	Methylene-tetrahydrofolate reductase C terminal		-	OG0000161	Ferredoxin thioredoxin reductase catalytic beta chain	OG0001541	-		-
OG0000557	-	OG0000485	Catalyzes the reversible reduction of methenyl- H(4)MPT( ) to methylene-H(4)MPT	OG0001819	Catalyzes the transfer of a phosphate group to glutamate to form L-glutamate 5-phosphate		-	OG0000166	Uncharacterised ArCR, COG2043	OG0001552	deoxyhypusine monooxygenase activity		-
OG0000562	eIF-2 functions in the early steps of protein synthesis by forming a ternary complex with GTP and initiator tRNA	OG0000490	Belongs to the class-II aminoacyl-tRNA synthetase family. Phe-tRNA synthetase alpha subunit type 2 subfamily	OG0001378	Protein of unknown function DUF131		-	OG0000177	transcription factor (CBF NF-Y)	OG0001593	PFAM 4Fe-4S ferredoxin, iron-sulfur binding domain protein		-
OG0000569	HTH-type transcriptional regulatory protein	OG0000505	Could be responsible for synthesis of pseudouridine from uracil-55 in the psi GC loop of transfer RNAs	OG0001718	-		-	OG0000180	TIGRFAM glutamine synthetase, type I	OG0001686	EamA-like transporter family		-
OG0000571	Multifunctional RNA-binding protein that recognizes the K-turn motif in ribosomal RNA, the RNA component of RNase P, box H ACA, box C D and box C' D' sRNAs	OG0000506	Binds to the 50S ribosomal subunit and prevents its association with the 30S ribosomal subunit to form the 70S initiation complex	OG0001859	-		-	OG0000182	Produces ATP from ADP in the presence of a proton gradient across the membrane. The archaeal alpha chain is a catalytic subunit	OG0001701	-		-
OG0000584	Protein of unknown function (DUF521)	OG0000525	Belongs to the MEMO1 family	OG0001960	Uncharacterized protein conserved in archaea (DUF2119)		-	OG0000184	PFAM Desulfoferrodoxin Dfx domain protein	OG0001714	Uracil DNA glycosylase superfamily		-
OG0000594	protein conserved in archaea	OG0000557	-	OG0001964	-		-	OG0000187	PFAM Radical SAM domain protein	OG0001736	Protein of unknown function DUF58		-
OG0000599	Belongs to the UPF0179 family	OG0000562	eIF-2 functions in the early steps of protein synthesis by forming a ternary complex with GTP and initiator tRNA	OG0000058	DNA methylase		-	OG0000192	KH, type 1, domain	OG0001758	Arginine deiminase		-
OG0000604	Belongs to the UPF0434 family	OG0000569	HTH-type transcriptional regulatory protein	OG0000588	PFAM phosphate transporter		-	OG0000194	Produces ATP from ADP in the presence of a proton gradient across the membrane. The archaeal beta chain is a regulatory subunit	OG0001772	-		-
OG0000607	Involved in the biosynthesis of isoprenoids. Catalyzes the 1,3-allylic rearrangement of the homoallylic substrate isopentenyl (IPP) to its allylic isomer, dimethylallyl diphosphate (DMAPP)	OG0000571	Multifunctional RNA-binding protein that recognizes the K-turn motif in ribosomal RNA, the RNA component of RNase P, box H ACA, box C D and box C' D' sRNAs	OG0001037	transcriptional regulators containing the CopG Arc MetJ DNA-binding domain		-	OG0000201	methyltransferase	OG0001787	Protein of unknown function (DUF475)		-
OG0000608	-	OG0000584	Protein of unknown function (DUF521)	OG0001146	archaeosine synthase activity		-	OG0000202	PFAM nucleic acid binding, OB-fold, tRNA helicase-type	OG0001880	-		-
OG0000623	Transcription elongation factor Spt5	OG0000594	protein conserved in archaea	OG0001129	ATP-citrate synthase (ATP-citrate (Pro-S-)-lyase)(Citrate cleavage enzyme)		-	OG0000203	SMART phosphoesterase PHP domain protein	OG0001985	peptidase activity		-
OG0000624	Forms part of the ribosomal stalk which helps the ribosome interact with GTP-bound translation factors	OG0000599	Belongs to the UPF0179 family	OG0000280	PQQ-like domain		-	OG0000212	Converts O-phospho-L-seryl-tRNA(Cys) (Sep-tRNA(Cys)) to L-cysteinyl-tRNA(Cys) (Cys-tRNA(Cys))	OG0002046	-		-
OG0000640	TIGRFAM DNA-directed RNA polymerase	OG0000604	Belongs to the UPF0434 family	OG0001123	PFAM Major Facilitator Superfamily		-	OG0000223	homolog, subfamily B, member 4	OG0002056	Predicted membrane protein (DUF2108)		-
OG0000641	Belongs to the UPF0218 family	OG0000607	Involved in the biosynthesis of isoprenoids. Catalyzes the 1,3-allylic rearrangement of the homoallylic substrate isopentenyl (IPP) to its allylic isomer, dimethylallyl diphosphate (DMAPP)	OG0000974	ATP-binding region, ATPase domain protein		-	OG0000226	PFAM respiratory-chain NADH dehydrogenase, subunit 1	OG0000050	Transcriptional regulator		-
OG0000648	Function in general translation initiation by promoting the binding of the formylmethionine-tRNA to ribosomes. Seems to function along with eIF-2	OG0000608	-	OG0001186	PFAM DNA alkylation repair enzyme		-	OG0000248	D-isomer specific 2-hydroxyacid dehydrogenase catalytic	OG0000482	PFAM FeoA family protein		-
OG0000649	Belongs to the eukaryotic ribosomal protein eL21 family	OG0000623	Transcription elongation factor Spt5	OG0000045	PFAM chemotaxis sensory transducer		-	OG0000251	MarC family integral membrane protein	OG0000961	HIT domain		-
OG0000654	This protein binds to the 23S rRNA, and is important in its secondary structure. It is located near the subunit interface in the base of the L7 L12 stalk, and near the tRNA binding site of the peptidyltransferase center	OG0000624	Forms part of the ribosomal stalk which helps the ribosome interact with GTP-bound translation factors	OG0001219	Belongs to the UPF0248 family		-	OG0000252	Catalyzes the condensation of iminoaspartate with dihydroxyacetone phosphate to form quinolinate	OG0000996	Domain of unknown function (DUF296)		-
OG0000655	One of the primary rRNA binding proteins, it binds directly to 16S rRNA central domain where it helps coordinate assembly of the platform of the 30S subunit	OG0000640	TIGRFAM DNA-directed RNA polymerase	OG0001253	DNA repair enzyme involved in the repair of deaminated bases. Selectively cleaves double-stranded DNA at the second phosphodiester bond 3' to a deoxyinosine leaving behind the intact lesion on the nicked DNA		-	OG0000259	Belongs to the peptidase M48B family	OG0001031	Sodium Bile acid symporter family		-
OG0000656	-	OG0000641	Belongs to the UPF0218 family	OG0001254	Acetyl xylan esterase (AXE1)		-	OG0000270	Heat shock 70 kDa protein	OG0001056	-		-
OG0000661	Ribosomal proteins 50S-L18Ae/60S-L20/60S-L18A	OG0000648	Function in general translation initiation by promoting the binding of the formylmethionine-tRNA to ribosomes. Seems to function along with eIF-2	OG0000057	Domain of unknown function (DUF4143)		-	OG0000272	DNA ligase that seals nicks in double-stranded DNA during DNA replication, DNA recombination and DNA repair	OG0001074	Na+/H+ ion antiporter subunit		-
OG0000668	Involved in DNA repair and in homologous recombination. May regulate the cleavage reactions of the branch-structured DNA. Has a very weak ATPase activity that is not stimulated by DNA. Binds DNA but does not promote DNA strands exchange	OG0000649	Belongs to the eukaryotic ribosomal protein eL21 family	OG0000243	COG1002 Type II restriction enzyme, methylase subunits		-	OG0000285	Archaeal Nre, N-terminal	OG0001076	TIGRFAM ATP-dependent DNA helicase, RecQ		-
OG0000682	Catalyzes the formation of isopentenyl diphosphate (IPP), the building block of all isoprenoids	OG0000654	This protein binds to the 23S rRNA, and is important in its secondary structure. It is located near the subunit interface in the base of the L7 L12 stalk, and near the tRNA binding site of the peptidyltransferase center	OG0000612	Pentapeptide repeats (9 copies)		-	OG0000286	SMART DNA-directed DNA polymerase B	OG0001130	-		-
OG0000000	Histidine kinase-, DNA gyrase B-, and HSP90-like ATPase	OG0000655	One of the primary rRNA binding proteins, it binds directly to 16S rRNA central domain where it helps coordinate assembly of the platform of the 30S subunit	OG0001303	PFAM Fe-S cluster domain protein		-	OG0000290	Removes the N-terminal methionine from nascent proteins. The N-terminal methionine is often cleaved when the second residue in the primary sequence is small and uncharged (Met-Ala-, Cys, Gly, Pro, Ser, Thr, or Val)	OG0001149	Catalyzes the reduction of hydroxylamine to form NH(3) and H(2)O		-
OG0000006	PFAM ABC transporter related	OG0000656	-	OG0001268	V4R		-	OG0000323	Belongs to the LarC family	OG0001180	PFAM Cupin 2 conserved barrel domain protein		-
OG0000043	Thioredoxin	OG0000661	Ribosomal proteins 50S-L18Ae/60S-L20/60S-L18A	OG0001316	Ribonuclease		-	OG0000329	TIGRFAM peptidase S26B, signal peptidase	OG0001187	STAS domain		-
OG0000055	MoeA domain protein domain I and II	OG0000668	Involved in DNA repair and in homologous recombination. May regulate the cleavage reactions of the branch-structured DNA. Has a very weak ATPase activity that is not stimulated by DNA. Binds DNA but does not promote DNA strands exchange	OG0000614	PQQ-like domain		-	OG0000331	PP-loop domain protein	OG0001218	4Fe-4S binding domain		-
OG0000118	PFAM NADH-ubiquinone oxidoreductase, chain 49kDa	OG0000682	Catalyzes the formation of isopentenyl diphosphate (IPP), the building block of all isoprenoids	OG0001383	Metal dependent phosphohydrolases with conserved 'HD' motif.		-	OG0000334	-	OG0001268	V4R		-
OG0000122	protein conserved in archaea	OG0000000	Histidine kinase-, DNA gyrase B-, and HSP90-like ATPase	OG0000999	EcoEI R protein C-terminal		-	OG0000345	Responsible for channeling the electrons from the oxidation of dihydroorotate from the FMN redox center in the PyrD type B subunit to the ultimate electron acceptor NAD( )	OG0001274	Flavodoxin		-
OG0000139	MoaE protein	OG0000006	PFAM ABC transporter related	OG0001454	Uracil DNA glycosylase superfamily		-	OG0000346	PFAM Glucose-6-phosphate isomerase	OG0001300	Acetyltransferase (GNAT) domain		-
OG0000141	PFAM NADH ubiquinone oxidoreductase 20 kDa subunit	OG0000043	Thioredoxin	OG0001465	Integral membrane protein CcmA involved in cell shape determination		-	OG0000347	Phosphoribosylaminoimidazolesuccinocarboxamide synthase	OG0001330	PFAM Isochorismatase		-
OG0000159	PFAM Oligosaccharyl transferase STT3 subunit	OG0000055	MoeA domain protein domain I and II	OG0000179	Transposase DDE domain		-	OG0000348	DNA-dependent ATPase and 3'-5' DNA helicase that may be involved in repair of stalled replication forks	OG0001348	Phosphoribosyl transferase domain		-
OG0000180	TIGRFAM glutamine synthetase, type I	OG0000118	PFAM NADH-ubiquinone oxidoreductase, chain 49kDa	OG0000327	Binding-protein-dependent transport system inner membrane component		-	OG0000349	DEAD DEAH box helicase domain protein	OG0001422	-		-
OG0000187	PFAM Radical SAM domain protein	OG0000122	protein conserved in archaea	OG0000479	ABC-type dipeptide oligopeptide nickel transport systems, permease components		-	OG0000359	-	OG0001428	COG0737 5'-nucleotidase 2',3'-cyclic phosphodiesterase and related esterases		-
OG0000203	SMART phosphoesterase PHP domain protein	OG0000139	MoaE protein	OG0001352	Family of unknown function (DUF5320)		-	OG0000362	Catalyzes the conversion of D-ribulose 5-phosphate to formate and 3,4-dihydroxy-2-butanone 4-phosphate	OG0001504	4-oxalocrotonate tautomerase		-
OG0000223	homolog, subfamily B, member 4	OG0000141	PFAM NADH ubiquinone oxidoreductase 20 kDa subunit	OG0001396	NAD(P)H dehydrogenase (quinone) activity		-	OG0000368	Carbohydrate kinase	OG0001520	-		-
OG0000226	PFAM respiratory-chain NADH dehydrogenase, subunit 1	OG0000159	PFAM Oligosaccharyl transferase STT3 subunit	OG0001022	ParE toxin of type II toxin-antitoxin system, parDE		-	OG0000377	PFAM nucleic acid binding, OB-fold, tRNA helicase-type	OG0001526	Belongs to the carbamate kinase family		-
OG0000272	DNA ligase that seals nicks in double-stranded DNA during DNA replication, DNA recombination and DNA repair	OG0000180	TIGRFAM glutamine synthetase, type I	OG0001528	Uncharacterized ACR, COG1430		-	OG0000381	Catalyzes the cyclization of GTP to (8S)-3',8-cyclo-7,8- dihydroguanosine 5'-triphosphate	OG0001551	-		-
OG0000286	SMART DNA-directed DNA polymerase B	OG0000187	PFAM Radical SAM domain protein	OG0001411	Heavy-metal-associated domain		-	OG0000389	ATP-grasp domain	OG0001612	Specifically methylates the pseudouridine at position 1915 (m3Psi1915) in 23S rRNA		-
OG0000334	-	OG0000203	SMART phosphoesterase PHP domain protein	OG0001677	Peptidase family M50		-	OG0000400	Belongs to the argininosuccinate synthase family. Type 1 subfamily	OG0001629	Phosphohydrolase-associated domain		-
OG0000346	PFAM Glucose-6-phosphate isomerase	OG0000223	homolog, subfamily B, member 4	OG0001732	Putative RNA methyltransferase		-	OG0000420	-	OG0001635	ABC-type multidrug transport system, permease component		-
OG0000348	DNA-dependent ATPase and 3'-5' DNA helicase that may be involved in repair of stalled replication forks	OG0000226	PFAM respiratory-chain NADH dehydrogenase, subunit 1	OG0001721	Associated with various cellular activities		-	OG0000431	Catalyzes the condensation of (S)-aspartate-beta- semialdehyde (S)-ASA and pyruvate to 4-hydroxy- tetrahydrodipicolinate (HTPA)	OG0001645	PFAM Glutamine amidotransferase class-I		-
OG0000362	Catalyzes the conversion of D-ribulose 5-phosphate to formate and 3,4-dihydroxy-2-butanone 4-phosphate	OG0000272	DNA ligase that seals nicks in double-stranded DNA during DNA replication, DNA recombination and DNA repair	OG0001720	Acetyltransferase (GNAT) domain		-	OG0000432	Belongs to the class-II aminoacyl-tRNA synthetase family	OG0001656	protein conserved in bacteria (DUF2179)		-
OG0000381	Catalyzes the cyclization of GTP to (8S)-3',8-cyclo-7,8- dihydroguanosine 5'-triphosphate	OG0000286	SMART DNA-directed DNA polymerase B	OG0001033	Staphylococcal nuclease homologue		-	OG0000435	Catalyzes the attachment of O-phosphoserine (Sep) to tRNA(Cys)	OG0001756	PFAM condensation domain protein		-
OG0000389	ATP-grasp domain	OG0000334	-	OG0001799	Protein of unknown function (DUF531)		-	OG0000439	-	OG0001786	-		-
OG0000420	-	OG0000346	PFAM Glucose-6-phosphate isomerase	OG0001582	Helix-turn-helix XRE-family like proteins		-	OG0000441	Possesses two activities a DNA synthesis (polymerase) and an exonucleolytic activity that degrades single-stranded DNA in the 3' to 5' direction. Has a template-primer preference which is characteristic of a replicative DNA polymerase	OG0001802	Methyltransferase type		-
OG0000432	Belongs to the class-II aminoacyl-tRNA synthetase family	OG0000348	DNA-dependent ATPase and 3'-5' DNA helicase that may be involved in repair of stalled replication forks	OG0001903	dephospho-CoA kinase activity		-	OG0000444	phosphoesterase RecJ domain protein	OG0001878	PFAM metallophosphoesterase		-
OG0000441	Possesses two activities a DNA synthesis (polymerase) and an exonucleolytic activity that degrades single-stranded DNA in the 3' to 5' direction. Has a template-primer preference which is characteristic of a replicative DNA polymerase	OG0000362	Catalyzes the conversion of D-ribulose 5-phosphate to formate and 3,4-dihydroxy-2-butanone 4-phosphate	OG0001906	-		-	OG0000460	PFAM Inositol monophosphatase	OG0001937	-		-
OG0000460	PFAM Inositol monophosphatase	OG0000381	Catalyzes the cyclization of GTP to (8S)-3',8-cyclo-7,8- dihydroguanosine 5'-triphosphate	OG0001910	transcriptional regulators containing the CopG Arc MetJ DNA-binding domain		-	OG0000461	-	OG0001974	Catalyzes the reversible phosphorylation of UMP to UDP		-
OG0000487	Catalyzes the synthesis of GMP from XMP	OG0000389	ATP-grasp domain	OG0001457	Putative Fe-S cluster		-	OG0000463	Component of the proteasome core, a large protease complex with broad specificity involved in protein degradation	OG0002081	Produces ATP from ADP in the presence of a proton gradient across the membrane		-
OG0000495	-	OG0000420	-	OG0001962	Xylose isomerase-like TIM barrel		-	OG0000465	Belongs to the RtcB family	OG0002109	-		-
OG0000511	Part of the RFC clamp loader complex which loads the PCNA sliding clamp onto DNA	OG0000432	Belongs to the class-II aminoacyl-tRNA synthetase family	OG0002013	amino acid activation for nonribosomal peptide biosynthetic process		-	OG0000473	Catalyzes the reversible conversion of ribose-5- phosphate to ribulose 5-phosphate	OG0002111	-		-
OG0000516	Catalyzes the transfer of a ribosyl phosphate group from 5-phosphoribose 1-diphosphate to orotate, leading to the formation of orotidine monophosphate (OMP)	OG0000441	Possesses two activities a DNA synthesis (polymerase) and an exonucleolytic activity that degrades single-stranded DNA in the 3' to 5' direction. Has a template-primer preference which is characteristic of a replicative DNA polymerase	OG0002036	Pyridoxal-dependent decarboxylase, pyridoxal binding domain		-	OG0000476	Catalyzes the conversion of 4-hydroxy- tetrahydrodipicolinate (HTPA) to tetrahydrodipicolinate	OG0000134	type I restriction modification DNA specificity domain		-
OG0000534	Catalyzes the transfer of the AMP portion of ATP to flavin mononucleotide (FMN) to produce flavin adenine dinucleotide (FAD) coenzyme	OG0000460	PFAM Inositol monophosphatase	OG0000117	Molybdopterin oxidoreductase Fe4S4 domain		-	OG0000478	PFAM Semialdehyde dehydrogenase NAD - binding	OG0000204	ATPase domain predominantly from Archaea		-
OG0000542	Binds directly to 23S rRNA. Probably involved in E site tRNA release	OG0000487	Catalyzes the synthesis of GMP from XMP	OG0000126	PFAM oxidoreductase nitrogenase, component 1		-	OG0000484	Belongs to the metallo-dependent hydrolases superfamily. DHOase family. Class I DHOase subfamily	OG0000247	Protein of unknown function DUF86		-
OG0000543	Forms part of the ribosomal stalk, playing a central role in the interaction of the ribosome with GTP-bound translation factors	OG0000495	-	OG0001095	PFAM peptidase		-	OG0000487	Catalyzes the synthesis of GMP from XMP	OG0000288	PFAM transposase, IS4 family protein		-
OG0000555	-	OG0000511	Part of the RFC clamp loader complex which loads the PCNA sliding clamp onto DNA	OG0001027	Has an important function as a repair enzyme for proteins that have been inactivated by oxidation. Catalyzes the reversible oxidation-reduction of methionine sulfoxide in proteins to methionine		-	OG0000491	TIGRFAM RNA methyltransferase, TrmH family, group 1	OG0001053	Part of a complex that catalyzes the formation of methyl-coenzyme M and tetrahydromethanopterin from coenzyme M and methyl-tetrahydromethanopterin. This is an energy-conserving, sodium-ion translocating step		-
OG0000561	Catalyzes the conversion of dihydroorotate to orotate	OG0000516	Catalyzes the transfer of a ribosyl phosphate group from 5-phosphoribose 1-diphosphate to orotate, leading to the formation of orotidine monophosphate (OMP)	OG0000314	RDD family		-	OG0000495	-	OG0001061	PFAM GPR1 FUN34 yaaH family		-
OG0000563	ATP-grasp domain	OG0000534	Catalyzes the transfer of the AMP portion of ATP to flavin mononucleotide (FMN) to produce flavin adenine dinucleotide (FAD) coenzyme	OG0000342	Domain of unknown function (DUF4445)		-	OG0000509	Translation initiation factor 2 alpha subunit	OG0001164	-		-
OG0000617	Belongs to the HisA HisF family	OG0000542	Binds directly to 23S rRNA. Probably involved in E site tRNA release	OG0000993	catalyzes the demethylation of specific methylglutamate residues introduced into the chemoreceptors (methyl-accepting chemotaxis proteins) by CheR		-	OG0000511	Part of the RFC clamp loader complex which loads the PCNA sliding clamp onto DNA	OG0001236	Catalyzes the NADPH-dependent reduction of ketopantoate into pantoic acid		-
OG0000620	Catalyzes the conversion of 7,8-dihydroneopterin (H2Neo) to 6-hydroxymethyl-7,8-dihydropterin (6-HMD)	OG0000543	Forms part of the ribosomal stalk, playing a central role in the interaction of the ribosome with GTP-bound translation factors	OG0001241	sugar phosphatases of the HAD superfamily		-	OG0000515	-	OG0001281	Calcineurin-like phosphoesterase superfamily domain		-
OG0000625	Integral membrane protein DUF92	OG0000555	-	OG0000839	CheC inhibitor of MCP methylation		-	OG0000516	Catalyzes the transfer of a ribosyl phosphate group from 5-phosphoribose 1-diphosphate to orotate, leading to the formation of orotidine monophosphate (OMP)	OG0001316	Ribonuclease		-
OG0000636	Hydrolyzes RNA 2',3'-cyclic phosphodiester to an RNA 2'- phosphomonoester	OG0000561	Catalyzes the conversion of dihydroorotate to orotate	OG0000929	COG0467 RecA-superfamily ATPases implicated in signal transduction		-	OG0000518	-	OG0001366	amino acid ABC transporter		-
OG0000644	3-Oxoacyl- acyl-carrier-protein (ACP) synthase III C terminal	OG0000563	ATP-grasp domain	OG0001208	Probably deamidates glutamine residues to glutamate on methyl-accepting chemotaxis receptors (MCPs), playing an important role in chemotaxis		-	OG0000521	PFAM Di-trans-poly-cis-decaprenylcistransferase	OG0001371	TIGRFAM asparagine synthase (glutamine-hydrolyzing)		-
OG0000658	Binds the lower part of the 30S subunit head	OG0000617	Belongs to the HisA HisF family	OG0000245	-		-	OG0000522	PFAM Shwachman-Bodian-Diamond syndrome	OG0001394	Nitroreductase family		-
OG0000663	Guanylyltransferase that catalyzes the activation of 2- phospho-L-lactate (LP) as (2S)-lactyl-2-diphospho-5'-guanosine (LPPG), via the condensation of LP with GTP. Is involved in the biosynthesis of coenzyme F420, a hydride carrier cofactor	OG0000620	Catalyzes the conversion of 7,8-dihydroneopterin (H2Neo) to 6-hydroxymethyl-7,8-dihydropterin (6-HMD)	OG0000863	toxin activity		-	OG0000523	Catalyzes the decarboxylation of L-tyrosine to produce tyramine for methanofuran biosynthesis. Can also catalyze the decarboxylation of L-aspartate to produce beta-alanine for coenzyme A (CoA) biosynthesis	OG0001415	Large-conductance mechanosensitive channel, MscL		-
OG0000664	Catalyzes the radical-mediated transfer of the hydroxybenzyl group from 4-hydroxyphenylpyruvate (HPP) to 5-amino- 6-ribitylamino-2,4(1H,3H)-pyrimidinedione to form 7,8-didemethyl- 8-hydroxy-5-deazariboflavin (FO)	OG0000625	Integral membrane protein DUF92	OG0001181	Helix-hairpin-helix domain		-	OG0000524	PFAM amidohydrolase	OG0001450	Sodium Bile acid symporter family		-
OG0000666	ArsR transcriptional regulator	OG0000636	Hydrolyzes RNA 2',3'-cyclic phosphodiester to an RNA 2'- phosphomonoester	OG0001019	WxcM-like, C-terminal		-	OG0000533	Catalyzes the ATP-dependent phosphorylation of thiamine- monophosphate (TMP) to form thiamine-pyrophosphate (TPP), the active form of vitamin B1	OG0001474	Pirin		-
OG0000669	TIGRFAM anaerobic ribonucleoside-triphosphate reductase activating protein	OG0000644	3-Oxoacyl- acyl-carrier-protein (ACP) synthase III C terminal	OG0001028	TIGRFAM cell division ATPase MinD		-	OG0000534	Catalyzes the transfer of the AMP portion of ATP to flavin mononucleotide (FMN) to produce flavin adenine dinucleotide (FAD) coenzyme	OG0001523	PFAM Beta propeller domain		-
OG0000675	Involved in DNA repair and in homologous recombination. Binds and assemble on single-stranded DNA to form a nucleoprotein filament. Hydrolyzes ATP in a ssDNA-dependent manner and promotes DNA strand exchange between homologous DNA molecules	OG0000658	Binds the lower part of the 30S subunit head	OG0000979	SNARE associated Golgi protein		-	OG0000539	-	OG0001554	PFAM Cobyrinic acid a,c-diamide synthase		-
OG0000688	SMART phosphoesterase PHP domain protein	OG0000663	Guanylyltransferase that catalyzes the activation of 2- phospho-L-lactate (LP) as (2S)-lactyl-2-diphospho-5'-guanosine (LPPG), via the condensation of LP with GTP. Is involved in the biosynthesis of coenzyme F420, a hydride carrier cofactor	OG0001061	PFAM GPR1 FUN34 yaaH family		-	OG0000540	Belongs to the phosphoglycerate kinase family	OG0001596	-		-
OG0000692	Forms part of the ribosomal stalk, playing a central role in the interaction of the ribosome with GTP-bound translation factors	OG0000664	Catalyzes the radical-mediated transfer of the hydroxybenzyl group from 4-hydroxyphenylpyruvate (HPP) to 5-amino- 6-ribitylamino-2,4(1H,3H)-pyrimidinedione to form 7,8-didemethyl- 8-hydroxy-5-deazariboflavin (FO)	OG0001035	PFAM glycosyl transferase, family 35		-	OG0000542	Binds directly to 23S rRNA. Probably involved in E site tRNA release	OG0001613	Phosphate-starvation-inducible E		-
OG0000698	Prokaryotic homologs of the JAB domain	OG0000666	ArsR transcriptional regulator	OG0001328	Oxidoreductase molybdopterin binding domain		-	OG0000543	Forms part of the ribosomal stalk, playing a central role in the interaction of the ribosome with GTP-bound translation factors	OG0001637	NADPH-dependent FMN reductase		-
OG0000703	Belongs to the UPF0212 family	OG0000669	TIGRFAM anaerobic ribonucleoside-triphosphate reductase activating protein	OG0001324	Nucleotidyl transferase		-	OG0000550	Domain of unknown function (DUF373)	OG0001640	LexA-binding, inner membrane-associated putative hydrolase		-
OG0000706	KEOPS complex Cgi121-like subunit	OG0000675	Involved in DNA repair and in homologous recombination. Binds and assemble on single-stranded DNA to form a nucleoprotein filament. Hydrolyzes ATP in a ssDNA-dependent manner and promotes DNA strand exchange between homologous DNA molecules	OG0001406	Rubrerythrin		-	OG0000552	DEAD DEAH box helicase domain protein	OG0001664	Calcineurin-like phosphoesterase		-
OG0000718	Belongs to the eukaryotic ribosomal protein eS28 family	OG0000688	SMART phosphoesterase PHP domain protein	OG0001228	helicase superfamily c-terminal domain		-	OG0000555	-	OG0001805	membrane		-
OG0000724	The globular domain of the protein is located near the polypeptide exit tunnel on the outside of the subunit, while an extended beta-hairpin is found that lines the wall of the exit tunnel in the center of the 70S ribosome	OG0000692	Forms part of the ribosomal stalk, playing a central role in the interaction of the ribosome with GTP-bound translation factors	OG0001011	Nucleotidyltransferase domain		-	OG0000561	Catalyzes the conversion of dihydroorotate to orotate	OG0001829	-		-
OG0000725	Protein S19 forms a complex with S13 that binds strongly to the 16S ribosomal RNA	OG0000698	Prokaryotic homologs of the JAB domain	OG0001108	-		-	OG0000563	ATP-grasp domain	OG0001832	-		-
OG0000726	One of the primary rRNA binding proteins. Required for association of the 30S and 50S subunits to form the 70S ribosome, for tRNA binding and peptide bond formation. It has been suggested to have peptidyltransferase activity	OG0000703	Belongs to the UPF0212 family	OG0001117	Toxic component of a toxin-antitoxin (TA) module. An RNase		-	OG0000567	One of the primary rRNA binding proteins, it binds directly to 16S rRNA where it nucleates assembly of the head domain of the 30S subunit. Is located at the subunit interface close to the decoding center	OG0001835	Domain of unknown function (DUF4440)		-
OG0000733	May be involved in maturation of the 30S ribosomal subunit	OG0000706	KEOPS complex Cgi121-like subunit	OG0001147	Toxic component of a toxin-antitoxin (TA) module. An RNase		-	OG0000568	PFAM ribosomal protein L7Ae L30e S12e Gadd45	OG0001839	-		-
OG0000005	PFAM Glycosyl transferase, group 1	OG0000718	Belongs to the eukaryotic ribosomal protein eS28 family	OG0001115	Belongs to the NifD NifK NifE NifN family		-	OG0000575	Specifically dimethylates two adjacent adenosines in the loop of a conserved hairpin near the 3'-end of 16S rRNA in the 30S particle. May play a critical role in biogenesis of 30S subunits	OG0001876	-		-
OG0000077	Transcriptional regulator, TrmB	OG0000724	The globular domain of the protein is located near the polypeptide exit tunnel on the outside of the subunit, while an extended beta-hairpin is found that lines the wall of the exit tunnel in the center of the 70S ribosome	OG0001562	Belongs to the peptidase S16 family		-	OG0000582	Belongs to the cytidylate kinase family. Type 2 subfamily	OG0001881	P-loop Domain of unknown function (DUF2791)		-
OG0000081	Catalyzes the ATP-dependent amidation of the two carboxylate groups at positions a and c of cobyrinate, using either L-glutamine or ammonia as the nitrogen source	OG0000725	Protein S19 forms a complex with S13 that binds strongly to the 16S ribosomal RNA	OG0000266	COGs COG3415 Transposase and inactivated derivatives		-	OG0000592	ATP-dependent agmatine transferase that catalyzes the formation of 2-agmatinylcytidine (agm2C) at the wobble position (C34) of tRNA(Ile2), converting the codon specificity from AUG to AUA	OG0001947	PFAM NADPH-dependent FMN reductase		-
OG0000107	TIGRFAM acetolactate synthase, large subunit, biosynthetic type	OG0000726	One of the primary rRNA binding proteins. Required for association of the 30S and 50S subunits to form the 70S ribosome, for tRNA binding and peptide bond formation. It has been suggested to have peptidyltransferase activity	OG0001729	Mn2 dependent serine threonine protein kinase		-	OG0000600	PFAM aminotransferase class V	OG0001986	Mediates influx of magnesium ions		-
OG0000171	Required for formate dehydrogenase (FDH) activity. Acts as a sulfur carrier protein that transfers sulfur from IscS to the molybdenum cofactor prior to its insertion into FDH	OG0000733	May be involved in maturation of the 30S ribosomal subunit	OG0001545	Belongs to the GbsR family		-	OG0000605	PFAM ABC transporter	OG0001999	-		-
OG0000174	Part of the ABC transporter complex PstSACB involved in phosphate import. Responsible for energy coupling to the transport system	OG0000005	PFAM Glycosyl transferase, group 1	OG0001739	Thioredoxin domain		-	OG0000615	TIGRFAM small GTP-binding protein	OG0002001	PHP-associated		-
OG0000228	Catalyzes the condensation of formaldehyde with tetrahydromethanopterin (H(4)MPT) to 5,10- methylenetetrahydromethanopterin	OG0000077	Transcriptional regulator, TrmB	OG0001862	Cys/Met metabolism PLP-dependent enzyme		-	OG0000617	Belongs to the HisA HisF family	OG0002040	-		-
OG0000256	PFAM PP-loop domain protein	OG0000081	Catalyzes the ATP-dependent amidation of the two carboxylate groups at positions a and c of cobyrinate, using either L-glutamine or ammonia as the nitrogen source	OG0001918	Adenylylsulphate kinase		-	OG0000619	Involved in targeting and insertion of nascent membrane proteins into the cytoplasmic membrane. Binds directly to 7S RNA and mediates binding of the 54 kDa subunit of the SRP	OG0002136	S-adenosylmethionine decarboxylase		-
OG0000264	Catalyzes the attachment of threonine to tRNA(Thr) in a two-step reaction L-threonine is first activated by ATP to form Thr-AMP and then transferred to the acceptor end of tRNA(Thr)	OG0000107	TIGRFAM acetolactate synthase, large subunit, biosynthetic type	OG0001626	-		-	OG0000620	Catalyzes the conversion of 7,8-dihydroneopterin (H2Neo) to 6-hydroxymethyl-7,8-dihydropterin (6-HMD)	OG0002155	-		-
OG0000309	TIGRFAM anaerobic ribonucleoside-triphosphate reductase	OG0000171	Required for formate dehydrogenase (FDH) activity. Acts as a sulfur carrier protein that transfers sulfur from IscS to the molybdenum cofactor prior to its insertion into FDH	OG0001661	-		-	OG0000625	Integral membrane protein DUF92	OG0002158	-		-
OG0000328	Catalyzes the ATP-dependent amidation of deamido-NAD to form NAD. Uses ammonia as a nitrogen source	OG0000174	Part of the ABC transporter complex PstSACB involved in phosphate import. Responsible for energy coupling to the transport system	OG0001917	COG0467 RecA-superfamily ATPases implicated in signal transduction		-	OG0000631	-	OG0002160	-		-
OG0000355	Catalyzes the reversible reduction of methylene-H(4)MPT to methyl-H(4)MPT	OG0000228	Catalyzes the condensation of formaldehyde with tetrahydromethanopterin (H(4)MPT) to 5,10- methylenetetrahydromethanopterin	OG0001680	-		-	OG0000636	Hydrolyzes RNA 2',3'-cyclic phosphodiester to an RNA 2'- phosphomonoester	OG0000317	Formate hydrogenlyase subunit 6 NADH ubiquinone oxidoreductase 23 kD subunit (chain I)		-
OG0000386	Uncharacterized protein conserved in archaea (DUF2114)	OG0000256	PFAM PP-loop domain protein	OG0002021	Catalyzes the cleavage of the N-glycosidic bond of deoxyribonucleoside 5'-monophosphates to yield deoxyribose 5- phosphate and a purine or pyrimidine base		-	OG0000639	Uroporphyrinogen-III synthase HemD	OG0000614	PQQ-like domain		-
OG0000392	Catalyzes the reversible interconversion of 5-formyl- H(4)MPT to methenyl-H(4)MPT(	OG0000264	Catalyzes the attachment of threonine to tRNA(Thr) in a two-step reaction L-threonine is first activated by ATP to form Thr-AMP and then transferred to the acceptor end of tRNA(Thr)	OG0001900	-		-	OG0000644	3-Oxoacyl- acyl-carrier-protein (ACP) synthase III C terminal	OG0000754	PFAM Cys Met metabolism		-
OG0000407	-	OG0000309	TIGRFAM anaerobic ribonucleoside-triphosphate reductase	OG0001978	aconitate hydratase		-	OG0000645	With S4 and S5 plays an important role in translational accuracy. Located at the interface of the 30S and 50S subunits	OG0000990	Belongs to the Glu Leu Phe Val dehydrogenases family		-
OG0000410	PFAM peptidase U62 modulator of DNA gyrase	OG0000328	Catalyzes the ATP-dependent amidation of deamido-NAD to form NAD. Uses ammonia as a nitrogen source	OG0001989	Citrate synthase, C-terminal domain		-	OG0000651	Involved in the biosynthesis of the chorismate, which leads to the biosynthesis of aromatic amino acids. Catalyzes the reversible NADPH linked reduction of 3-dehydroshikimate (DHSA) to yield shikimate (SA)	OG0001035	PFAM glycosyl transferase, family 35		-
OG0000418	Belongs to the class-IV pyridoxal-phosphate-dependent aminotransferase family	OG0000355	Catalyzes the reversible reduction of methylene-H(4)MPT to methyl-H(4)MPT	OG0002066	-		-	OG0000653	Integral membrane protein DUF106	OG0001066	MafB19-like deaminase		-
OG0000424	Stage II sporulation protein M	OG0000386	Uncharacterized protein conserved in archaea (DUF2114)	OG0002069	DsrE/DsrF/DrsH-like family		-	OG0000657	One of the primary rRNA binding proteins, it binds specifically to the 5'-end of 16S ribosomal RNA	OG0001069	Part of a complex that catalyzes the formation of methyl-coenzyme M and tetrahydromethanopterin from coenzyme M and methyl-tetrahydromethanopterin. This is an energy-conserving, sodium-ion translocating step		-
OG0000430	tRNA synthetases class II (D, K and N)	OG0000392	Catalyzes the reversible interconversion of 5-formyl- H(4)MPT to methenyl-H(4)MPT(	OG0002072	Major facilitator superfamily		-	OG0000658	Binds the lower part of the 30S subunit head	OG0001154	Phosphoribosyl transferase domain		-
OG0000442	Catalyzes two steps in the biosynthesis of coenzyme A. In the first step cysteine is conjugated to 4'-phosphopantothenate to form 4-phosphopantothenoylcysteine, in the latter compound is decarboxylated to form 4'-phosphopantotheine	OG0000407	-	OG0001039	Belongs to the PdaD family		-	OG0000663	Guanylyltransferase that catalyzes the activation of 2- phospho-L-lactate (LP) as (2S)-lactyl-2-diphospho-5'-guanosine (LPPG), via the condensation of LP with GTP. Is involved in the biosynthesis of coenzyme F420, a hydride carrier cofactor	OG0001170	-		-
OG0000446	AIR carboxylase	OG0000410	PFAM peptidase U62 modulator of DNA gyrase	OG0001106	Belongs to the UPF0146 family		-	OG0000664	Catalyzes the radical-mediated transfer of the hydroxybenzyl group from 4-hydroxyphenylpyruvate (HPP) to 5-amino- 6-ribitylamino-2,4(1H,3H)-pyrimidinedione to form 7,8-didemethyl- 8-hydroxy-5-deazariboflavin (FO)	OG0001217	DNA-dependent RNA polymerase catalyzes the transcription of DNA into RNA using the four ribonucleoside triphosphates as substrates		-
OG0000450	PFAM Haloacid dehalogenase domain protein hydrolase	OG0000418	Belongs to the class-IV pyridoxal-phosphate-dependent aminotransferase family	OG0000336	haloacid dehalogenase-like hydrolase		-	OG0000666	ArsR transcriptional regulator	OG0001230	regulatory protein, arsR		-
OG0000457	Orotidine 5'-phosphate decarboxylase	OG0000424	Stage II sporulation protein M	OG0001121	PFAM tRNA methyltransferase complex GCD14 subunit		-	OG0000669	TIGRFAM anaerobic ribonucleoside-triphosphate reductase activating protein	OG0001235	Glycosyl transferases group 1		-
OG0000471	Relaxes both positive and negative superturns and exhibits a strong decatenase activity	OG0000430	tRNA synthetases class II (D, K and N)	OG0000838	PFAM conserved		-	OG0000675	Involved in DNA repair and in homologous recombination. Binds and assemble on single-stranded DNA to form a nucleoprotein filament. Hydrolyzes ATP in a ssDNA-dependent manner and promotes DNA strand exchange between homologous DNA molecules	OG0001294	ABC-type molybdate transport system periplasmic component		-
OG0000472	methyltransferase small	OG0000442	Catalyzes two steps in the biosynthesis of coenzyme A. In the first step cysteine is conjugated to 4'-phosphopantothenate to form 4-phosphopantothenoylcysteine, in the latter compound is decarboxylated to form 4'-phosphopantotheine	OG0001096	PFAM sigma-70 region 4 domain protein		-	OG0000676	PFAM CBS domain	OG0001317	PFAM plasmid stabilization system		-
OG0000489	TIGRFAM molybdenum cofactor synthesis domain	OG0000446	AIR carboxylase	OG0001136	PFAM type II secretion system protein E		-	OG0000678	Catalyzes the formation of 6,7-dimethyl-8- ribityllumazine by condensation of 5-amino-6-(D- ribitylamino)uracil with 3,4-dihydroxy-2-butanone 4-phosphate. This is the penultimate step in the biosynthesis of riboflavin	OG0001328	Oxidoreductase molybdopterin binding domain		-
OG0000493	Catalyzes the NADPH-dependent reduction of glutamyl- tRNA(Glu) to glutamate 1-semialdehyde (GSA)	OG0000450	PFAM Haloacid dehalogenase domain protein hydrolase	OG0001137	type II secretion system protein		-	OG0000679	Protein of unknown function DUF89	OG0001350	Transfers an acetyl group from acetyl-CoA to L- homoserine, forming acetyl-L-homoserine		-
OG0000502	PFAM ATPase, BadF BadG BcrA BcrD type	OG0000457	Orotidine 5'-phosphate decarboxylase	OG0000114	PFAM CheW domain protein		-	OG0000688	SMART phosphoesterase PHP domain protein	OG0001377	ZIP Zinc transporter		-
OG0000503	Belongs to the UPF0288 family	OG0000471	Relaxes both positive and negative superturns and exhibits a strong decatenase activity	OG0000803	Phosphatidylethanolamine-binding protein		-	OG0000691	PFAM Diphthamide synthesis DPH2 protein	OG0001383	Metal dependent phosphohydrolases with conserved 'HD' motif.		-
OG0000513	-	OG0000472	methyltransferase small	OG0001148	PBP superfamily domain		-	OG0000692	Forms part of the ribosomal stalk, playing a central role in the interaction of the ribosome with GTP-bound translation factors	OG0001391	Calcineurin-like phosphoesterase superfamily domain		-
OG0000514	Stabilizes TBP binding to an archaeal box-A promoter. Also responsible for recruiting RNA polymerase II to the pre- initiation complex (DNA-TBP-TFIIB)	OG0000489	TIGRFAM molybdenum cofactor synthesis domain	OG0001125	-		-	OG0000698	Prokaryotic homologs of the JAB domain	OG0001418	PFAM Nucleotidyl transferase		-
OG0000532	Belongs to the SUI1 family	OG0000493	Catalyzes the NADPH-dependent reduction of glutamyl- tRNA(Glu) to glutamate 1-semialdehyde (GSA)	OG0001128	TIGRFAM mannose-1-phosphate guanylyltransferase mannose-6-phosphate isomerase		-	OG0000701	Involved in allosteric regulation of aspartate carbamoyltransferase	OG0001427	Polyphosphate kinase 2 (PPK2)		-
OG0000537	Catalyzes the transfer of the enolpyruvyl moiety of phosphoenolpyruvate (PEP) to the 5-hydroxyl of shikimate-3- phosphate (S3P) to produce enolpyruvyl shikimate-3-phosphate and inorganic phosphate	OG0000502	PFAM ATPase, BadF BadG BcrA BcrD type	OG0001135	-		-	OG0000702	TIGRFAM argininosuccinate lyase	OG0001435	-		-
OG0000547	Involved in the biosynthesis of the central metabolite phospho-alpha-D-ribosyl-1-pyrophosphate (PRPP) via the transfer of pyrophosphoryl group from ATP to 1-hydroxyl of ribose-5-phosphate (Rib-5-P)	OG0000503	Belongs to the UPF0288 family	OG0001001	DGC domain		-	OG0000703	Belongs to the UPF0212 family	OG0001535	Acetyltransferase (GNAT) domain		-
OG0000549	PFAM peptidase U62 modulator of DNA gyrase	OG0000513	-	OG0001126	-		-	OG0000706	KEOPS complex Cgi121-like subunit	OG0001543	Uncharacterised ACR (DUF711)		-
OG0000558	PFAM AIR synthase related protein	OG0000514	Stabilizes TBP binding to an archaeal box-A promoter. Also responsible for recruiting RNA polymerase II to the pre- initiation complex (DNA-TBP-TFIIB)	OG0001034	Glyoxalase-like domain		-	OG0000707	Hydantoinase/oxoprolinase	OG0001580	TIGRFAM MIP family channel		-
OG0000565	-	OG0000532	Belongs to the SUI1 family	OG0001279	Permease		-	OG0000718	Belongs to the eukaryotic ribosomal protein eS28 family	OG0001605	-		-
OG0000597	Relaxes both positive and negative superturns and exhibits a strong decatenase activity	OG0000537	Catalyzes the transfer of the enolpyruvyl moiety of phosphoenolpyruvate (PEP) to the 5-hydroxyl of shikimate-3- phosphate (S3P) to produce enolpyruvyl shikimate-3-phosphate and inorganic phosphate	OG0000204	ATPase domain predominantly from Archaea		-	OG0000719	Belongs to the eukaryotic ribosomal protein eS6 family	OG0001641	glycosyl transferase, family 39		-
OG0000616	Zn-ribbon containing protein	OG0000547	Involved in the biosynthesis of the central metabolite phospho-alpha-D-ribosyl-1-pyrophosphate (PRPP) via the transfer of pyrophosphoryl group from ATP to 1-hydroxyl of ribose-5-phosphate (Rib-5-P)	OG0001230	regulatory protein, arsR		-	OG0000723	Binds to 23S rRNA. Forms part of two intersubunit bridges in the 70S ribosome	OG0001674	-		-
OG0000629	Serine Threonine protein kinase	OG0000549	PFAM peptidase U62 modulator of DNA gyrase	OG0001350	Transfers an acetyl group from acetyl-CoA to L- homoserine, forming acetyl-L-homoserine		-	OG0000724	The globular domain of the protein is located near the polypeptide exit tunnel on the outside of the subunit, while an extended beta-hairpin is found that lines the wall of the exit tunnel in the center of the 70S ribosome	OG0001696	Histidine kinase-like ATPase domain		-
OG0000632	Transfers a GMP moiety from GTP to Mo-molybdopterin (Mo- MPT) cofactor (Moco or molybdenum cofactor) to form Mo- molybdopterin guanine dinucleotide (Mo-MGD) cofactor	OG0000558	PFAM AIR synthase related protein	OG0001058	COG1403 Restriction endonuclease		-	OG0000725	Protein S19 forms a complex with S13 that binds strongly to the 16S ribosomal RNA	OG0001700	small multi-drug export		-
OG0000637	Tetrapolymerization of the monopyrrole PBG into the hydroxymethylbilane pre-uroporphyrinogen in several discrete steps	OG0000565	-	OG0001365	Polysaccharide biosynthesis protein		-	OG0000726	One of the primary rRNA binding proteins. Required for association of the 30S and 50S subunits to form the 70S ribosome, for tRNA binding and peptide bond formation. It has been suggested to have peptidyltransferase activity	OG0001734	Protein of unknown function (DUF1328)		-
OG0000638	Belongs to the class-III pyridoxal-phosphate-dependent aminotransferase family. HemL subfamily	OG0000597	Relaxes both positive and negative superturns and exhibits a strong decatenase activity	OG0001390	PFAM phosphoesterase, PA-phosphatase related		-	OG0000733	May be involved in maturation of the 30S ribosomal subunit	OG0001815	-		-
OG0000646	1-(5-phosphoribosyl)-5- (5-phosphoribosylamino)methylideneamino imidazole-4-carboxamide isomerase	OG0000616	Zn-ribbon containing protein	OG0001426	Belongs to the UPF0216 family		-	OG0000734	RNA polymerase that catalyzes the synthesis of short RNA molecules used as primers for DNA polymerase during DNA replication	OG0001892	COG0491 Zn-dependent hydrolases, including glyoxylases		-
OG0000659	-	OG0000629	Serine Threonine protein kinase	OG0001514	Destroys radicals which are normally produced within the cells and which are toxic to biological systems		-	OG0000735	binds to the 23S rRNA	OG0001972	Protein of unknown function (DUF1059)		-
OG0000667	PAC2 family	OG0000632	Transfers a GMP moiety from GTP to Mo-molybdopterin (Mo- MPT) cofactor (Moco or molybdenum cofactor) to form Mo- molybdopterin guanine dinucleotide (Mo-MGD) cofactor	OG0000102	B12 binding domain		-	OG0000736	Fumarase C-terminus	OG0001987	-		-
OG0000713	Belongs to the RNA polymerase beta chain family	OG0000637	Tetrapolymerization of the monopyrrole PBG into the hydroxymethylbilane pre-uroporphyrinogen in several discrete steps	OG0001216	MTH865-like family		-	OG0000740	Catalyzes the dephosphorylation of 2-phosphoglycolate	OG0002044	-		-
OG0000715	methanogenesis marker protein 7	OG0000638	Belongs to the class-III pyridoxal-phosphate-dependent aminotransferase family. HemL subfamily	OG0001363	Protein of unknown function DUF72		-	OG0000745	-	OG0002048	-		-
OG0000721	Pfam:DUF552	OG0000646	1-(5-phosphoribosyl)-5- (5-phosphoribosylamino)methylideneamino imidazole-4-carboxamide isomerase	OG0001722	Radical SAM		-	OG0000765	PFAM Like-Sm ribonucleoprotein, core	OG0002137	H subunit		-
OG0000727	One of the primary rRNA binding proteins, it binds directly near the 3'-end of the 23S rRNA, where it nucleates assembly of the 50S subunit	OG0000659	-	OG0001710	Uncharacterised protein family (UPF0182)		-	OG0000768	aspartate ornithine carbamoyltransferase, carbamoyl-P binding domain	OG0002184	-		-
OG0000741	phosphoribosylformylglycinamidine synthase activity	OG0000667	PAC2 family	OG0001782	-		-	OG0000778	Component of the proteasome core, a large protease complex with broad specificity involved in protein degradation	OG0002242	-		-
OG0000743	Protein of unknown function (DUF447)	OG0000713	Belongs to the RNA polymerase beta chain family	OG0001382	Calcineurin-like phosphoesterase		-	OG0000782	Catalyzes the transfer of diphosphate from ATP to 6- hydroxymethyl-7,8-dihydropterin (6-HMD), leading to 6- hydroxymethyl-7,8-dihydropterin diphosphate (6-HMDP)	OG0002244	PFAM Tetratricopeptide repeat		-
OG0000746	-	OG0000715	methanogenesis marker protein 7	OG0000364	Uroporphyrinogen decarboxylase (URO-D)		-	OG0000783	One of two assembly initiator proteins, it binds directly to the 5'-end of the 23S rRNA, where it nucleates assembly of the 50S subunit	OG0000236	SMART regulatory protein AsnC Lrp family		-
OG0000749	binds to the 23S rRNA	OG0000721	Pfam:DUF552	OG0001598	-		-	OG0000784	Belongs to the universal ribosomal protein uL29 family	OG0000273	-		-
OG0000757	Catalyzes the formation of 4-(hydroxymethyl)-2- furancarboxaldehyde phosphate (4-HFC-P) from two molecules of glyceraldehyde-3-P (GA-3-P)	OG0000727	One of the primary rRNA binding proteins, it binds directly near the 3'-end of the 23S rRNA, where it nucleates assembly of the 50S subunit	OG0001564	glycoside hydrolase, family		-	OG0000790	Fe-S type, tartrate fumarate subfamily, alpha	OG0000980	Glycosyl hydrolase family 57		-
OG0000766	KH domain protein	OG0000741	phosphoribosylformylglycinamidine synthase activity	OG0001907	RnfC Barrel sandwich hybrid domain		-	OG0000792	PFAM PRC-barrel domain	OG0000998	PFAM MgtE integral membrane region		-
OG0000769	Specifically catalyzes the AdoMet-dependent 2'-O-ribose methylation of cytidine at position 56 in tRNAs	OG0000743	Protein of unknown function (DUF447)	OG0001963	electron transport complex, RnfABCDGE type, B subunit		-	OG0000798	PFAM CBS domain containing protein	OG0001058	COG1403 Restriction endonuclease		-
OG0000781	Involved in the binding of tRNA to the ribosomes	OG0000746	-	OG0002015	Part of a membrane complex involved in electron transport		-	OG0000799	PFAM Archease protein family (DUF101 UPF0211)	OG0001065	Bacterial regulatory helix-turn-helix protein, lysR family		-
OG0000785	Binds to 23S rRNA. One of the proteins that surrounds the polypeptide exit tunnel on the outside of the ribosome	OG0000749	binds to the 23S rRNA	OG0002016	Part of a membrane complex involved in electron transport		-	OG0000801	Protein of unknown function (DUF460)	OG0001120	Cl- channel, voltage-gated family protein		-
OG0000007	PFAM response regulator receiver	OG0000757	Catalyzes the formation of 4-(hydroxymethyl)-2- furancarboxaldehyde phosphate (4-HFC-P) from two molecules of glyceraldehyde-3-P (GA-3-P)	OG0002017	Part of a membrane complex involved in electron transport		-	OG0000808	Belongs to the UPF0285 family	OG0001243	-		-
OG0000120	AAA-like domain	OG0000766	KH domain protein	OG0002018	Part of a membrane complex involved in electron transport		-	OG0000814	-	OG0001282	COG0518 GMP synthase - Glutamine amidotransferase domain		-
OG0000234	Methanogenesis marker protein 8	OG0000769	Specifically catalyzes the AdoMet-dependent 2'-O-ribose methylation of cytidine at position 56 in tRNAs	OG0001533	Sugar-specific transcriptional regulator TrmB		-	OG0000821	Converts cobyric acid to cobinamide by the addition of aminopropanol on the F carboxylic group	OG0001285	Possibly the antitoxin component of a		-
OG0000269	Domain of unknown function (DUF1894)	OG0000781	Involved in the binding of tRNA to the ribosomes	OG0002014	peptidyl-tyrosine sulfation		-	OG0000834	TIGRFAM riboflavin synthase	OG0001324	Nucleotidyl transferase		-
OG0000293	Catalyzes the reversible transfer of a formyl group from formylmethanofuran (formyl-MFR) to tetrahydromethanopterin (H(4)MPT) so as to produce 5-formyl tetrahydromethanopterin (5- formyl-H(4)MPT) and methanofuran (MFR)	OG0000785	Binds to 23S rRNA. One of the proteins that surrounds the polypeptide exit tunnel on the outside of the ribosome	OG0001991	Anion-transporting ATPase		-	OG0000853	Catalyzes the CTP-dependent phosphorylation of riboflavin (vitamin B2) to form flavin mononucleotide (FMN)	OG0001329	Sulfate permease family		-
OG0000330	Catalyzes the complex heterocyclic radical-mediated conversion of 6-carboxy-5,6,7,8-tetrahydropterin (CPH4) to 7- carboxy-7-deazaguanine (CDG), a step common to the biosynthetic pathways of all 7-deazapurine-containing compounds	OG0000007	PFAM response regulator receiver	OG0002068	Protein of unknown function TPD sequence-motif		-	OG0000884	Essential subunit of the Sec protein translocation channel SecYEG. Clamps together the 2 halves of SecY. May contact the channel plug during translocation	OG0001337	O-methyltransferase		-
OG0000357	Calcineurin-like phosphoesterase superfamily domain	OG0000120	AAA-like domain	OG0002116	TIR domain		-	OG0000903	Belongs to the UPF0280 family	OG0001354	COG0733 Na -dependent transporters of the SNF family		-
OG0000367	DNA topoisomerase II activity	OG0000234	Methanogenesis marker protein 8	OG0002119	-		-	OG0000947	PFAM 4Fe-4S ferredoxin, iron-sulfur binding domain protein	OG0001364	DNA polymerase beta		-
OG0000395	amino acids such as threonine, to avoid such errors, it has a posttransfer editing activity that hydrolyzes mischarged Thr-tRNA(Val) in a tRNA-dependent manner	OG0000269	Domain of unknown function (DUF1894)	OG0002129	Molybdopterin oxidoreductase Fe4S4 domain		-	OG0000971	-	OG0001365	Polysaccharide biosynthesis protein		-
OG0000436	B-block binding subunit of TFIIIC	OG0000293	Catalyzes the reversible transfer of a formyl group from formylmethanofuran (formyl-MFR) to tetrahydromethanopterin (H(4)MPT) so as to produce 5-formyl tetrahydromethanopterin (5- formyl-H(4)MPT) and methanofuran (MFR)	OG0000981	peptidase dimerisation domain		-	OG0000987	Metal dependent phosphohydrolases with conserved 'HD' motif.	OG0001390	PFAM phosphoesterase, PA-phosphatase related		-
OG0000496	PFAM isocitrate isopropylmalate dehydrogenase	OG0000330	Catalyzes the complex heterocyclic radical-mediated conversion of 6-carboxy-5,6,7,8-tetrahydropterin (CPH4) to 7- carboxy-7-deazaguanine (CDG), a step common to the biosynthetic pathways of all 7-deazapurine-containing compounds	OG0001082	Uncharacterized protein containing a ferredoxin domain (DUF2148)		-	OG0001039	Belongs to the PdaD family	OG0001406	Rubrerythrin		-
OG0000501	Catalyzes the methyl esterification of L-isoaspartyl residues in peptides and proteins that result from spontaneous decomposition of normal L-aspartyl and L-asparaginyl residues. It plays a role in the repair and or degradation of damaged proteins	OG0000357	Calcineurin-like phosphoesterase superfamily domain	OG0000983	PFAM low molecular weight phosphotyrosine protein phosphatase		-	OG0001106	Belongs to the UPF0146 family	OG0001426	Belongs to the UPF0216 family		-
OG0000591	Endonuclease that specifically degrades the RNA of RNA- DNA hybrids	OG0000367	DNA topoisomerase II activity	OG0001064	Acetyltransferase (GNAT) domain		-	OG0001111	LOR SDH bifunctional enzyme conserved	OG0001478	MscS Mechanosensitive ion channel		-
OG0000595	PFAM tRNA synthetase, class II (G, H, P and S)	OG0000395	amino acids such as threonine, to avoid such errors, it has a posttransfer editing activity that hydrolyzes mischarged Thr-tRNA(Val) in a tRNA-dependent manner	OG0000312	PFAM aldo keto reductase		-	OG0001127	Predicted membrane protein (DUF2070)	OG0001479	COG0433 Predicted ATPase		-
OG0000621	PFAM Mur ligase, middle domain protein	OG0000436	B-block binding subunit of TFIIIC	OG0001003	PFAM glycosyl transferase group 1		-	OG0001392	Domain of unknown function (DUF371)	OG0001510	TIGRFAM methyltransferase FkbM family		-
OG0000626	Catalyzes the attachment of tyrosine to tRNA(Tyr) in a two-step reaction tyrosine is first activated by ATP to form Tyr- AMP and then transferred to the acceptor end of tRNA(Tyr)	OG0000496	PFAM isocitrate isopropylmalate dehydrogenase	OG0001162	PFAM ABC-2 type transporter		-	OG0000003	PFAM PKD domain containing protein	OG0001522	Has nucleotide phosphatase activity towards ATP, GTP, CTP, TTP and UTP. May hydrolyze nucleoside diphosphates with lower efficiency		-
OG0000647	Uroporphyrin-III C tetrapyrrole (Corrin Porphyrin) methyltransferase	OG0000501	Catalyzes the methyl esterification of L-isoaspartyl residues in peptides and proteins that result from spontaneous decomposition of normal L-aspartyl and L-asparaginyl residues. It plays a role in the repair and or degradation of damaged proteins	OG0001184	KaiC		-	OG0000005	PFAM Glycosyl transferase, group 1	OG0001542	-		-
OG0000709	PFAM AAA ATPase central domain protein	OG0000591	Endonuclease that specifically degrades the RNA of RNA- DNA hybrids	OG0001273	structural constituent of ribosome		-	OG0000010	Major facilitator superfamily	OG0001581	-		-
OG0000737	methyltransferase activity	OG0000595	PFAM tRNA synthetase, class II (G, H, P and S)	OG0000167	Phage integrase family		-	OG0000016	MacB-like periplasmic core domain	OG0001589	D-fructose-1,6-bisphosphate 1-phosphohydrolase class 1		-
OG0000742	Catalyzes the NADPH-dependent reduction of N-acetyl-5- glutamyl phosphate to yield N-acetyl-L-glutamate 5-semialdehyde	OG0000621	PFAM Mur ligase, middle domain protein	OG0001234	Alpha-acetolactate decarboxylase		-	OG0000017	ATPases associated with a variety of cellular activities	OG0001595	-		-
OG0000744	Dihydrouridine synthase (Dus)	OG0000626	Catalyzes the attachment of tyrosine to tRNA(Tyr) in a two-step reaction tyrosine is first activated by ATP to form Tyr- AMP and then transferred to the acceptor end of tRNA(Tyr)	OG0001083	ABC-type transport system involved in lipoprotein release permease component		-	OG0000029	PFAM Glycosyl transferase family 2	OG0001643	Belongs to the UPF0237 family		-
OG0000774	Catalyzes the ATP-dependent conversion of 7-carboxy-7- deazaguanine (CDG) to 7-cyano-7-deazaguanine (preQ(0))	OG0000647	Uroporphyrin-III C tetrapyrrole (Corrin Porphyrin) methyltransferase	OG0001180	PFAM Cupin 2 conserved barrel domain protein		-	OG0000039	PFAM Carboxymuconolactone decarboxylase	OG0001652	Uncharacterized protein family, UPF0114		-
OG0000777	pfam nmd3	OG0000709	PFAM AAA ATPase central domain protein	OG0001282	COG0518 GMP synthase - Glutamine amidotransferase domain		-	OG0000053	mechanosensitive ion channel	OG0001750	Domain of unknown function (DUF4405)		-
OG0000794	Prephenate dehydratase	OG0000737	methyltransferase activity	OG0001380	-		-	OG0000066	Dimerisation domain of Zinc Transporter	OG0001774	CO dehydrogenase/acetyl-CoA synthase delta subunit		-
OG0000822	DUF35 OB-fold domain, acyl-CoA-associated	OG0000742	Catalyzes the NADPH-dependent reduction of N-acetyl-5- glutamyl phosphate to yield N-acetyl-L-glutamate 5-semialdehyde	OG0001140	-		-	OG0000071	Catalyzes the isomerization between 2-isopropylmalate and 3-isopropylmalate, via the formation of 2-isopropylmaleate	OG0001811	PFAM UbiA prenyltransferase		-
OG0000823	Uncharacterized protein conserved in archaea (DUF2112)	OG0000744	Dihydrouridine synthase (Dus)	OG0001361	Trypsin		-	OG0000074	Catalyzes the isomerization between 2-isopropylmalate and 3-isopropylmalate, via the formation of 2-isopropylmaleate	OG0001866	NADPH-dependent FMN reductase		-
OG0000426	PFAM NADP oxidoreductase coenzyme F420-dependent	OG0000774	Catalyzes the ATP-dependent conversion of 7-carboxy-7- deazaguanine (CDG) to 7-cyano-7-deazaguanine (preQ(0))	OG0001466	-		-	OG0000077	Transcriptional regulator, TrmB	OG0001882	Protein of unknown function (DUF2281)		-
OG0000544	Belongs to the alpha-IPM synthase homocitrate synthase family	OG0000777	pfam nmd3	OG0001578	Elongator protein 3, MiaB family, Radical SAM		-	OG0000078	Sodium/hydrogen exchanger family	OG0001883	-		-
OG0000545	peptidase M42 family protein	OG0000794	Prephenate dehydratase	OG0001311	PFAM Uncharacterised protein family UPF0150		-	OG0000080	ATPase, P-type (transporting), HAD superfamily, subfamily IC	OG0001919	MgtE intracellular N domain		-
OG0000596	COG3634 Alkyl hydroperoxide reductase, large subunit	OG0000822	DUF35 OB-fold domain, acyl-CoA-associated	OG0001339	Important for reducing fluoride concentration in the cell, thus reducing its toxicity		-	OG0000081	Catalyzes the ATP-dependent amidation of the two carboxylate groups at positions a and c of cobyrinate, using either L-glutamine or ammonia as the nitrogen source	OG0002041	PFAM Orn Lys Arg decarboxylase major region		-
OG0000700	Methanogenesis marker 13 metalloprotein	OG0000823	Uncharacterized protein conserved in archaea (DUF2112)	OG0001810	more specifically in 18S rRNA pseudouridylation and in cleavage of pre-rRNA		-	OG0000091	Catalyzes the ferredoxin-dependent oxidative decarboxylation of arylpyruvates	OG0002076	Polynucleotide kinase that can phosphorylate the 5'- hydroxyl groups of both single-stranded RNA (ssRNA) and single- stranded DNA (ssDNA). Exhibits a strong preference for ssRNA		-
OG0000705	PFAM Like-Sm ribonucleoprotein, core	OG0000426	PFAM NADP oxidoreductase coenzyme F420-dependent	OG0001167	Transposase		-	OG0000094	Ribonuclease R winged-helix domain	OG0002084	-		-
OG0000761	Acetolactate synthase, small subunit	OG0000544	Belongs to the alpha-IPM synthase homocitrate synthase family	OG0001681	Dodecin		-	OG0000107	TIGRFAM acetolactate synthase, large subunit, biosynthetic type	OG0002159	-		-
OG0000779	DNA polymerase beta domain protein region	OG0000545	peptidase M42 family protein	OG0001091	Uncharacterised protein family (UPF0175)		-	OG0000113	Site-specific tyrosine recombinase, which acts by catalyzing the cutting and rejoining of the recombining DNA molecules	OG0002185	PFAM Metal-dependent phosphohydrolase, HD		-
OG0000817	6-pyruvoyl tetrahydropterin synthase	OG0000596	COG3634 Alkyl hydroperoxide reductase, large subunit	OG0001776	Fic/DOC family		-	OG0000124	PFAM ABC transporter	OG0002190	-		-
OG0000818	aspartate glutamate uridylate kinase	OG0000700	Methanogenesis marker 13 metalloprotein	OG0001762	DRTGG domain		-	OG0000130	CoB--CoM heterodisulfide reductase subunit B	OG0002218	ATP-dependent agmatine transferase that catalyzes the formation of 2-agmatinylcytidine (agm2C) at the wobble position (C34) of tRNA(Ile2), converting the codon specificity from AUG to AUA		-
OG0000845	acid binding OB-fold tRNA helicase-type	OG0000705	PFAM Like-Sm ribonucleoprotein, core	OG0001790	-		-	OG0000131	PFAM pyridoxamine 5'-phosphate oxidase-related FMN-binding	OG0002243	-		-
OG0000849	but it may be involved in stabilization of the trimeric complex	OG0000761	Acetolactate synthase, small subunit	OG0001911	Oxidoreductase FAD-binding domain		-	OG0000135	Part of the RFC clamp loader complex which loads the PCNA sliding clamp onto DNA	OG0002254	-		-
OG0000059	PFAM Cobyrinic acid a,c-diamide synthase	OG0000779	DNA polymerase beta domain protein region	OG0001914	ATPase associated with various cellular activities, AAA_5		-	OG0000171	Required for formate dehydrogenase (FDH) activity. Acts as a sulfur carrier protein that transfers sulfur from IscS to the molybdenum cofactor prior to its insertion into FDH	OG0000012	Probable transposase		-
OG0000402	PFAM DEAD_2 domain protein	OG0000817	6-pyruvoyl tetrahydropterin synthase	OG0001850	Protein of unknown function (DUF2892)		-	OG0000174	Part of the ABC transporter complex PstSACB involved in phosphate import. Responsible for energy coupling to the transport system	OG0000225	Subunit R is required for both nuclease and ATPase activities, but not for modification		-
OG0000428	Belongs to the TrpF family	OG0000818	aspartate glutamate uridylate kinase	OG0001957	PFAM Radical SAM		-	OG0000189	Produces ATP from ADP in the presence of a proton gradient across the membrane	OG0000239	4Fe-4S dicluster domain		-
OG0000593	PFAM PUA domain containing protein	OG0000845	acid binding OB-fold tRNA helicase-type	OG0001966	-		-	OG0000191	Protein of unknown function (DUF2551)	OG0000844	PFAM nucleoside recognition domain protein		-
OG0000758	Catalyzes the deamination of 5-methylthioadenosine and S-adenosyl-L-homocysteine into 5-methylthioinosine and S-inosyl-L- homocysteine, respectively. Is also able to deaminate adenosine	OG0000849	but it may be involved in stabilization of the trimeric complex	OG0002011	ApbE family		-	OG0000206	DegT/DnrJ/EryC1/StrS aminotransferase family	OG0000999	EcoEI R protein C-terminal		-
OG0000865	Catalyzes the condensation of pyruvate and acetyl- coenzyme A to form (R)-citramalate	OG0000059	PFAM Cobyrinic acid a,c-diamide synthase	OG0002067	-		-	OG0000216	Seems to be required for maximal rate of protein biosynthesis. Enhances ribosome dissociation into subunits and stabilizes the binding of the initiator Met-tRNA(I) to 40 S ribosomal subunits	OG0001026	Belongs to the class-I aminoacyl-tRNA synthetase family		-
OG0000665	Belongs to the alpha-IPM synthase homocitrate synthase family	OG0000402	PFAM DEAD_2 domain protein	OG0000887	PFAM Bacterial Ig-like domain (group 2)		-	OG0000219	Binds and transfers iron-sulfur (Fe-S) clusters to target apoproteins. Can hydrolyze ATP	OG0001054	Uncharacterized protein conserved in archaea (DUF2180)		-
OG0000899	PFAM Pre-mRNA processing ribonucleoprotein, binding	OG0000428	Belongs to the TrpF family	OG0002020	COG0463 Glycosyltransferases involved in cell wall biogenesis		-	OG0000228	Catalyzes the condensation of formaldehyde with tetrahydromethanopterin (H(4)MPT) to 5,10- methylenetetrahydromethanopterin	OG0001178	Serine dehydrogenase proteinase		-
OG0000874	component I	OG0000593	PFAM PUA domain containing protein	OG0002070	Hydrolyzes mannosyl-3-phosphoglycerate (MPG) to form the osmolyte mannosylglycerate (MG)		-	OG0000231	PFAM Nitrilase cyanide hydratase and apolipoprotein N-acyltransferase	OG0001204	membrane-bound metal-dependent hydrolase		-
OG0000904	Belongs to the UPF0215 family	OG0000758	Catalyzes the deamination of 5-methylthioadenosine and S-adenosyl-L-homocysteine into 5-methylthioinosine and S-inosyl-L- homocysteine, respectively. Is also able to deaminate adenosine	OG0002128	-		-	OG0000238	This enzyme is involved in nucleotide metabolism it produces dUMP, the immediate precursor of thymidine nucleotides and it decreases the intracellular concentration of dUTP so that uracil cannot be incorporated into DNA	OG0001228	helicase superfamily c-terminal domain		-
OG0000916	PFAM Indole-3-glycerol phosphate synthase	OG0000865	Catalyzes the condensation of pyruvate and acetyl- coenzyme A to form (R)-citramalate	OG0002150	Uncharacterized protein family UPF0016		-	OG0000254	PFAM sugar isomerase (SIS)	OG0001276	-		-
OG0000015	Iron-sulfur cluster-binding domain	OG0000665	Belongs to the alpha-IPM synthase homocitrate synthase family	OG0002151	-		-	OG0000256	PFAM PP-loop domain protein	OG0001309	HEPN domain		-
OG0000221	Catalyzes the condensation of 4-aminobenzoate (pABA) with 5-phospho-alpha-D-ribose 1-diphosphate (PRPP) to produce beta-ribofuranosylaminobenzene 5'-phosphate (beta-RFA-P)	OG0000899	PFAM Pre-mRNA processing ribonucleoprotein, binding	OG0002206	histone H2A K63-linked ubiquitination		-	OG0000264	Catalyzes the attachment of threonine to tRNA(Thr) in a two-step reaction L-threonine is first activated by ATP to form Thr-AMP and then transferred to the acceptor end of tRNA(Thr)	OG0001349	PFAM Conserved TM helix repeat-containing protein		-
OG0000374	Part of a complex that catalyzes the reversible cleavage of acetyl-CoA, allowing	OG0000874	component I	OG0002231	-		-	OG0000279	PFAM band 7 protein	OG0001413	Protein of unknown function, DUF488		-
OG0000590	Part of a complex that catalyzes the reversible cleavage of acetyl-CoA, allowing	OG0000904	Belongs to the UPF0215 family	OG0002235	Responsible for removing an oxidatively damaged form of guanine (7,8-dihydro-8-oxoguanine 7-oxoG) from DNA. Also nicks DNA at apurinic apyrimidinic sites (AP sites)		-	OG0000291	Transcriptional regulator	OG0001416	Belongs to the pyruvate kinase family		-
OG0000921	PFAM Phosphatidylglycerophosphatase A	OG0000916	PFAM Indole-3-glycerol phosphate synthase	OG0000060	response regulator, receiver		-	OG0000294	PFAM UBA THIF-type NAD FAD binding protein	OG0001454	Uracil DNA glycosylase superfamily		-
OG0000038	SMART Elongator protein 3 MiaB NifB	OG0000015	Iron-sulfur cluster-binding domain	OG0000313	PFAM AMP-dependent synthetase and ligase		-	OG0000301	YcaO cyclodehydratase, ATP-ad Mg2+-binding	OG0001465	Integral membrane protein CcmA involved in cell shape determination		-
OG0000082	PFAM binding-protein-dependent transport systems inner membrane component	OG0000221	Catalyzes the condensation of 4-aminobenzoate (pABA) with 5-phospho-alpha-D-ribose 1-diphosphate (PRPP) to produce beta-ribofuranosylaminobenzene 5'-phosphate (beta-RFA-P)	OG0000975	Succinate dehydrogenase fumarate reductase flavoprotein subunit		-	OG0000305	Phosphorylase superfamily	OG0001472	ABC-type branched-chain amino acid transport systems, periplasmic component		-
OG0000092	beta-lactamase domain protein	OG0000374	Part of a complex that catalyzes the reversible cleavage of acetyl-CoA, allowing	OG0001176	PFAM LemA family		-	OG0000306	Produces ATP from ADP in the presence of a proton gradient across the membrane	OG0001491	COG2133 Glucose sorbosone dehydrogenases		-
OG0000123	General factor that plays a role in the activation of archaeal genes transcribed by RNA polymerase. Binds specifically to the TATA box promoter element which lies close to the position of transcription initiation	OG0000590	Part of a complex that catalyzes the reversible cleavage of acetyl-CoA, allowing	OG0000753	toxin activity		-	OG0000309	TIGRFAM anaerobic ribonucleoside-triphosphate reductase	OG0001514	Destroys radicals which are normally produced within the cells and which are toxic to biological systems		-
OG0000133	PFAM CBS domain containing protein	OG0000921	PFAM Phosphatidylglycerophosphatase A	OG0001107	Uncharacterised ArCR, COG2043		-	OG0000315	PFAM peptidase M24	OG0001555	PFAM Iron-containing alcohol dehydrogenase		-
OG0000158	Produces ATP from ADP in the presence of a proton gradient across the membrane	OG0000589	CO-methylating acetyl-CoA synthase activity	OG0001301	TIGRFAM methionine-R-sulfoxide reductase		-	OG0000322	coenzyme F420 hydrogenase dehydrogenase beta subunit domain protein	OG0001571	CAAX protease self-immunity		-
OG0000195	Belongs to the V-ATPase 116 kDa subunit family	OG0000944	Part of the ACDS complex that catalyzes the reversible cleavage of acetyl-CoA, allowing growth on acetate as sole source of carbon and energy. The alpha-epsilon subcomponent functions as a carbon monoxide dehydrogenase	OG0001278	PFAM deoxyribose-phosphate aldolase phospho-2-dehydro-3-deoxyheptonate aldolase		-	OG0000324	Belongs to the UPF0173 family	OG0001586	2TM domain		-
OG0000197	Catalyzes the radical-mediated transfer of the hydroxybenzyl group from 4-hydroxyphenylpyruvate (HPP) to 5-amino- 6-ribitylamino-2,4(1H,3H)-pyrimidinedione to form 7,8-didemethyl- 8-hydroxy-5-deazariboflavin (FO)	OG0001215	shikimate kinase activity	OG0001275	PQ loop repeat		-	OG0000328	Catalyzes the ATP-dependent amidation of deamido-NAD to form NAD. Uses ammonia as a nitrogen source	OG0001607	SpoIIAA-like		-
OG0000200	PFAM H transporting two-sector ATPase C subunit	OG0000828	Flavoprotein	OG0001319	PspC domain		-	OG0000333	EndoIII-related endonuclease	OG0001669	Protein of unknown function (DUF1294)		-
OG0000249	-	OG0001158	Domain of unknown function (DUF2088)	OG0000198	Beta-Ig-H3 fasciclin		-	OG0000344	Involved in regulation of DNA replication	OG0001683	-		-
OG0000307	Catalyzes the sequential NAD-dependent oxidations of L- histidinol to L-histidinaldehyde and then to L-histidine	OG0001197	Catalytic component of the exosome, which is a complex involved in RNA degradation. Has 3'- 5' exoribonuclease activity. Can also synthesize heteropolymeric RNA-tails	OG0001236	Catalyzes the NADPH-dependent reduction of ketopantoate into pantoic acid		-	OG0000355	Catalyzes the reversible reduction of methylene-H(4)MPT to methyl-H(4)MPT	OG0001689	-		-
OG0000318	Diphthamide synthase	OG0001220	Non-catalytic component of the exosome, which is a complex involved in RNA degradation. Contributes to the structuring of the Rrp41 active site	OG0001371	TIGRFAM asparagine synthase (glutamine-hydrolyzing)		-	OG0000361	Is required not only for elongation of protein synthesis but also for the initiation of all mRNA translation through initiator tRNA(fMet) aminoacylation	OG0001691	Polysaccharide biosynthesis protein		-
OG0000319	-	OG0001267	Catalyzes the reversible transfer of the terminal phosphate group between ATP and AMP. Plays an important role in cellular energy homeostasis and in adenine nucleotide metabolism	OG0001377	ZIP Zinc transporter		-	OG0000366	PFAM Transmembrane exosortase (Exosortase_EpsH)	OG0001731	Ferritin-like domain		-
OG0000378	An RNase that has 5'-3' exonuclease activity. May be involved in RNA degradation	OG0001272	Predicted RNA-binding protein	OG0001349	PFAM Conserved TM helix repeat-containing protein		-	OG0000384	8-oxoguanine DNA glycosylase domain protein	OG0001733	Domain of unknown function (DUF362)		-
OG0000425	Membrane protein of unknown function DUF63	OG0001299	DHH family	OG0000683	Protein of unknown function (DUF1016)		-	OG0000385	PAC2 family	OG0001793	Proline dehydrogenase		-
OG0000510	TIGRFAM histone acetyltransferase, ELP3 family	OG0001246	Catalyzes the interconversion of 2-phosphoglycerate and 3-phosphoglycerate	OG0001573	Uncharacterized protein conserved in archaea (DUF2193)		-	OG0000386	Uncharacterized protein conserved in archaea (DUF2114)	OG0001867	-		-
OG0000541	D-aminoacyl-tRNA deacylase with broad substrate specificity. By recycling D-aminoacyl-tRNA to D-amino acids and free tRNA molecules, this enzyme counteracts the toxicity associated with the formation of D-aminoacyl-tRNA entities in vivo	OG0001189	von Willebrand factor (vWF) type A domain	OG0001320	Nucleotidyltransferase domain		-	OG0000387	PFAM AIR synthase related protein	OG0001988	Anion transporter		-
OG0000570	SMART Peptidase A22, presenilin signal peptide	OG0000038	SMART Elongator protein 3 MiaB NifB	OG0000169	Transposase domain (DUF772)		-	OG0000392	Catalyzes the reversible interconversion of 5-formyl- H(4)MPT to methenyl-H(4)MPT(	OG0002028	-		-
OG0000642	PFAM CBS domain containing protein	OG0000082	PFAM binding-protein-dependent transport systems inner membrane component	OG0001370	von willebrand factor, type A		-	OG0000407	-	OG0002050	N-formylglutamate amidohydrolase		-
OG0000662	Catalyzes the hydrolysis of the adenine ring of phosphoribosyl-AMP	OG0000092	beta-lactamase domain protein	OG0001609	TIGRFAM serine O-acetyltransferase		-	OG0000408	phosphoribosylformylglycinamidine synthase	OG0002074	UV-endonuclease UvdE		-
OG0000677	Involved in the regulation of the intracellular balance of NAD and NADP, and is a key enzyme in the biosynthesis of NADP. Catalyzes specifically the phosphorylation on 2'-hydroxyl of the adenosine moiety of NAD to yield NADP	OG0000123	General factor that plays a role in the activation of archaeal genes transcribed by RNA polymerase. Binds specifically to the TATA box promoter element which lies close to the position of transcription initiation	OG0001623	Acetyltransferase (GNAT) domain		-	OG0000410	PFAM peptidase U62 modulator of DNA gyrase	OG0002134	-		-
OG0000680	Catalyzes the reversible phosphorylation of UMP to UDP	OG0000133	PFAM CBS domain containing protein	OG0001633	Restriction endonuclease		-	OG0000416	PFAM Thiolase	OG0002157	-		-
OG0000695	Dimethylates a single guanine residue at position 26 of a number of tRNAs using S-adenosyl-L-methionine as donor of the methyl groups	OG0000158	Produces ATP from ADP in the presence of a proton gradient across the membrane	OG0001685	Glucose / Sorbosone dehydrogenase		-	OG0000417	archaeal Zn-finger protein	OG0002161	-		-
OG0000708	Large family of predicted nucleotide-binding domains	OG0000195	Belongs to the V-ATPase 116 kDa subunit family	OG0001259	Metallo-beta-lactamase superfamily		-	OG0000418	Belongs to the class-IV pyridoxal-phosphate-dependent aminotransferase family	OG0002171	-		-
OG0000711	Belongs to the UPF0147 family	OG0000197	Catalyzes the radical-mediated transfer of the hydroxybenzyl group from 4-hydroxyphenylpyruvate (HPP) to 5-amino- 6-ribitylamino-2,4(1H,3H)-pyrimidinedione to form 7,8-didemethyl- 8-hydroxy-5-deazariboflavin (FO)	OG0001583	-		-	OG0000424	Stage II sporulation protein M	OG0002192	-		-
OG0000722	Belongs to the eukaryotic ribosomal protein eS4 family	OG0000200	PFAM H transporting two-sector ATPase C subunit	OG0001237	EamA-like transporter family		-	OG0000430	tRNA synthetases class II (D, K and N)	OG0002240	-		-
OG0000730	One of the primary rRNA binding proteins, it binds directly to 16S rRNA where it nucleates assembly of the body of the 30S subunit	OG0000249	-	OG0001644	DsrE/DsrF-like family		-	OG0000438	Belongs to the IlvD Edd family	OG0002257	Domain of unknown function (DUF1848)		-
OG0000731	Located at the top of the head of the 30S subunit, it contacts several helices of the 16S rRNA. In the 70S ribosome it contacts the 23S rRNA (bridge B1a) and protein L5 of the 50S subunit (bridge B1b), connecting the 2 subunits	OG0000307	Catalyzes the sequential NAD-dependent oxidations of L- histidinol to L-histidinaldehyde and then to L-histidine	OG0001679	Acetyltransferase (GNAT) domain		-	OG0000440	Belongs to the aspartokinase family	OG0002260	-		-
OG0000018	PFAM NAD-dependent epimerase dehydratase	OG0000318	Diphthamide synthase	OG0001872	-		-	OG0000442	Catalyzes two steps in the biosynthesis of coenzyme A. In the first step cysteine is conjugated to 4'-phosphopantothenate to form 4-phosphopantothenoylcysteine, in the latter compound is decarboxylated to form 4'-phosphopantotheine	OG0002289	B3/4 domain		-
OG0000040	PFAM Nitroreductase	OG0000319	-	OG0001909	Uncharacterized ACR, COG1993		-	OG0000446	AIR carboxylase	OG0002327	PFAM Sulfate transporter antisigma-factor antagonist STAS		-
OG0000182	Produces ATP from ADP in the presence of a proton gradient across the membrane. The archaeal alpha chain is a catalytic subunit	OG0000378	An RNase that has 5'-3' exonuclease activity. May be involved in RNA degradation	OG0001760	-		-	OG0000449	glycine hydroxymethyltransferase activity	OG0002386	PFAM transcriptional coactivator pterin dehydratase		-
OG0000194	Produces ATP from ADP in the presence of a proton gradient across the membrane. The archaeal beta chain is a regulatory subunit	OG0000425	Membrane protein of unknown function DUF63	OG0001796	-		-	OG0000450	PFAM Haloacid dehalogenase domain protein hydrolase	OG0000102	B12 binding domain		-
OG0000259	Belongs to the peptidase M48B family	OG0000510	TIGRFAM histone acetyltransferase, ELP3 family	OG0001529	Protein of unknown function (DUF433)		-	OG0000457	Orotidine 5'-phosphate decarboxylase	OG0000103	Subtilase family		-
OG0000270	Heat shock 70 kDa protein	OG0000541	D-aminoacyl-tRNA deacylase with broad substrate specificity. By recycling D-aminoacyl-tRNA to D-amino acids and free tRNA molecules, this enzyme counteracts the toxicity associated with the formation of D-aminoacyl-tRNA entities in vivo	OG0001807	Leucyl aminopeptidase (Aminopeptidase t)		-	OG0000459	PFAM peptidase M50	OG0000104	Tetratricopeptide repeat		-
OG0000329	TIGRFAM peptidase S26B, signal peptidase	OG0000570	SMART Peptidase A22, presenilin signal peptide	OG0001973	Belongs to the HMG-CoA reductase family		-	OG0000462	Belongs to the lyase 1 family. Adenylosuccinate lyase subfamily	OG0000157	Oligopeptide/dipeptide transporter, C-terminal region		-
OG0000377	PFAM nucleic acid binding, OB-fold, tRNA helicase-type	OG0000642	PFAM CBS domain containing protein	OG0001131	Belongs to the acylphosphatase family		-	OG0000471	Relaxes both positive and negative superturns and exhibits a strong decatenase activity	OG0000179	Transposase DDE domain		-
OG0000465	Belongs to the RtcB family	OG0000662	Catalyzes the hydrolysis of the adenine ring of phosphoribosyl-AMP	OG0001853	Belongs to the Protein of		-	OG0000472	methyltransferase small	OG0000240	ABC-2 family transporter protein		-
OG0000478	PFAM Semialdehyde dehydrogenase NAD - binding	OG0000677	Involved in the regulation of the intracellular balance of NAD and NADP, and is a key enzyme in the biosynthesis of NADP. Catalyzes specifically the phosphorylation on 2'-hydroxyl of the adenosine moiety of NAD to yield NADP	OG0002039	Amidohydrolase		-	OG0000474	Catalyzes amidations at positions B, D, E, and G on adenosylcobyrinic A,C-diamide. NH(2) groups are provided by glutamine, and one molecule of ATP is hydrogenolyzed for each amidation	OG0000268	-		-
OG0000491	TIGRFAM RNA methyltransferase, TrmH family, group 1	OG0000680	Catalyzes the reversible phosphorylation of UMP to UDP	OG0001185	Protein of unknown function (DUF1638)		-	OG0000489	TIGRFAM molybdenum cofactor synthesis domain	OG0000311	Transposase, Mutator family		-
OG0000518	-	OG0000695	Dimethylates a single guanine residue at position 26 of a number of tRNAs using S-adenosyl-L-methionine as donor of the methyl groups	OG0001902	-		-	OG0000493	Catalyzes the NADPH-dependent reduction of glutamyl- tRNA(Glu) to glutamate 1-semialdehyde (GSA)	OG0000468	Sulfurtransferase TusA		-
OG0000523	Catalyzes the decarboxylation of L-tyrosine to produce tyramine for methanofuran biosynthesis. Can also catalyze the decarboxylation of L-aspartate to produce beta-alanine for coenzyme A (CoA) biosynthesis	OG0000708	Large family of predicted nucleotide-binding domains	OG0002022	Domain of unknown function (DUF4130		-	OG0000494	PFAM AIR synthase related protein	OG0000683	Protein of unknown function (DUF1016)		-
OG0000533	Catalyzes the ATP-dependent phosphorylation of thiamine- monophosphate (TMP) to form thiamine-pyrophosphate (TPP), the active form of vitamin B1	OG0000711	Belongs to the UPF0147 family	OG0002093	PFAM nitrogen-fixing NifU domain protein		-	OG0000502	PFAM ATPase, BadF BadG BcrA BcrD type	OG0000944	Part of the ACDS complex that catalyzes the reversible cleavage of acetyl-CoA, allowing growth on acetate as sole source of carbon and energy. The alpha-epsilon subcomponent functions as a carbon monoxide dehydrogenase		-
OG0000539	-	OG0000722	Belongs to the eukaryotic ribosomal protein eS4 family	OG0002132	DNA replication initiation		-	OG0000503	Belongs to the UPF0288 family	OG0001011	Nucleotidyltransferase domain		-
OG0000552	DEAD DEAH box helicase domain protein	OG0000730	One of the primary rRNA binding proteins, it binds directly to 16S rRNA where it nucleates assembly of the body of the 30S subunit	OG0002133	Belongs to the class I-like SAM-binding methyltransferase superfamily. RsmB NOP family		-	OG0000508	Belongs to the peptidase M50B family	OG0001067	Binding-protein-dependent transport system inner membrane component		-
OG0000615	TIGRFAM small GTP-binding protein	OG0000731	Located at the top of the head of the 30S subunit, it contacts several helices of the 16S rRNA. In the 70S ribosome it contacts the 23S rRNA (bridge B1a) and protein L5 of the 50S subunit (bridge B1b), connecting the 2 subunits	OG0002153	-		-	OG0000513	-	OG0001071	Part of a complex that catalyzes the reversible cleavage of acetyl-CoA, allowing autotrophic growth from CO(2). The alpha- epsilon subcomponent functions as a carbon monoxide dehydrogenase. The precise role of the epsilon subunit is unclear		-
OG0000651	Involved in the biosynthesis of the chorismate, which leads to the biosynthesis of aromatic amino acids. Catalyzes the reversible NADPH linked reduction of 3-dehydroshikimate (DHSA) to yield shikimate (SA)	OG0000018	PFAM NAD-dependent epimerase dehydratase	OG0002179	Winged helix-turn-helix domain (DUF2582)		-	OG0000514	Stabilizes TBP binding to an archaeal box-A promoter. Also responsible for recruiting RNA polymerase II to the pre- initiation complex (DNA-TBP-TFIIB)	OG0001156	Putative pyruvate format-lyase activating enzyme (DUF1786)		-
OG0000653	Integral membrane protein DUF106	OG0000040	PFAM Nitroreductase	OG0001740	Family of unknown function (DUF5371)		-	OG0000520	TGS domain protein	OG0001221	Phage plasmid primase, P4		-
OG0000657	One of the primary rRNA binding proteins, it binds specifically to the 5'-end of 16S ribosomal RNA	OG0000182	Produces ATP from ADP in the presence of a proton gradient across the membrane. The archaeal alpha chain is a catalytic subunit	OG0001901	COG1361 S-layer domain		-	OG0000532	Belongs to the SUI1 family	OG0001293	Outer membrane lipoprotein-sorting protein		-
OG0000691	PFAM Diphthamide synthesis DPH2 protein	OG0000194	Produces ATP from ADP in the presence of a proton gradient across the membrane. The archaeal beta chain is a regulatory subunit	OG0001990	-		-	OG0000535	Catalyzes the interconversion of methylthioribose-1- phosphate (MTR-1-P) into methylthioribulose-1-phosphate (MTRu-1- P)	OG0001369	Protein of unknown function (DUF354)		-
OG0000701	Involved in allosteric regulation of aspartate carbamoyltransferase	OG0000259	Belongs to the peptidase M48B family	OG0002033	PAP2 superfamily		-	OG0000537	Catalyzes the transfer of the enolpyruvyl moiety of phosphoenolpyruvate (PEP) to the 5-hydroxyl of shikimate-3- phosphate (S3P) to produce enolpyruvyl shikimate-3-phosphate and inorganic phosphate	OG0001395	PFAM Substrate-binding region of ABC-type glycine betaine transport system		-
OG0000707	Hydantoinase/oxoprolinase	OG0000270	Heat shock 70 kDa protein	OG0002071	COG3387 Glucoamylase and related glycosyl hydrolases		-	OG0000538	-	OG0001421	Catalyzes the interconversion of 2-phosphoglycerate and 3-phosphoglycerate		-
OG0000719	Belongs to the eukaryotic ribosomal protein eS6 family	OG0000329	TIGRFAM peptidase S26B, signal peptidase	OG0002126	peptidase U32		-	OG0000547	Involved in the biosynthesis of the central metabolite phospho-alpha-D-ribosyl-1-pyrophosphate (PRPP) via the transfer of pyrophosphoryl group from ATP to 1-hydroxyl of ribose-5-phosphate (Rib-5-P)	OG0001434	PFAM Protein kinase domain		-
OG0000723	Binds to 23S rRNA. Forms part of two intersubunit bridges in the 70S ribosome	OG0000377	PFAM nucleic acid binding, OB-fold, tRNA helicase-type	OG0002145	Virulence factor BrkB		-	OG0000549	PFAM peptidase U62 modulator of DNA gyrase	OG0001475	Metallo-beta-lactamase superfamily		-
OG0000734	RNA polymerase that catalyzes the synthesis of short RNA molecules used as primers for DNA polymerase during DNA replication	OG0000465	Belongs to the RtcB family	OG0002202	-		-	OG0000558	PFAM AIR synthase related protein	OG0001486	Catalase		-
OG0000735	binds to the 23S rRNA	OG0000478	PFAM Semialdehyde dehydrogenase NAD - binding	OG0002209	Zinc-dependent metalloprotease		-	OG0000565	-	OG0001527	COG0471 Di- and tricarboxylate transporters		-
OG0000745	-	OG0000491	TIGRFAM RNA methyltransferase, TrmH family, group 1	OG0002273	-		-	OG0000576	Involved in the third step of the chorismate pathway, which leads to the biosynthesis of aromatic amino acids. Catalyzes the cis-dehydration of 3-dehydroquinate (DHQ) and introduces the first double bond of the aromatic ring to yield 3- dehydroshikimate	OG0001546	glycosyl transferase family 2		-
OG0000765	PFAM Like-Sm ribonucleoprotein, core	OG0000518	-	OG0002286	-		-	OG0000583	TIGRFAM UbiD family	OG0001573	Uncharacterized protein conserved in archaea (DUF2193)		-
OG0000768	aspartate ornithine carbamoyltransferase, carbamoyl-P binding domain	OG0000523	Catalyzes the decarboxylation of L-tyrosine to produce tyramine for methanofuran biosynthesis. Can also catalyze the decarboxylation of L-aspartate to produce beta-alanine for coenzyme A (CoA) biosynthesis	OG0002311	Threonine synthase N terminus		-	OG0000597	Relaxes both positive and negative superturns and exhibits a strong decatenase activity	OG0001576	Methionine biosynthesis protein MetW		-
OG0000782	Catalyzes the transfer of diphosphate from ATP to 6- hydroxymethyl-7,8-dihydropterin (6-HMD), leading to 6- hydroxymethyl-7,8-dihydropterin diphosphate (6-HMDP)	OG0000533	Catalyzes the ATP-dependent phosphorylation of thiamine- monophosphate (TMP) to form thiamine-pyrophosphate (TPP), the active form of vitamin B1	OG0001111	LOR SDH bifunctional enzyme conserved		-	OG0000598	Hydrolase	OG0001579	SnoaL-like polyketide cyclase		-
OG0000783	One of two assembly initiator proteins, it binds directly to the 5'-end of the 23S rRNA, where it nucleates assembly of the 50S subunit	OG0000539	-	OG0001081	PFAM peptidase zinc-dependent		-	OG0000603	PFAM triphosphoribosyl-dephospho-CoA protein	OG0001660	-		-
OG0000784	Belongs to the universal ribosomal protein uL29 family	OG0000552	DEAD DEAH box helicase domain protein	OG0001166	PFAM amine oxidase		-	OG0000611	PFAM Methylated-DNA- protein -cysteine S-methyltransferase	OG0001675	Acetyltransferase (GNAT) family		-
OG0000792	PFAM PRC-barrel domain	OG0000615	TIGRFAM small GTP-binding protein	OG0001213	PFAM glycosyl transferase family 39		-	OG0000616	Zn-ribbon containing protein	OG0001706	-		-
OG0000798	PFAM CBS domain containing protein	OG0000651	Involved in the biosynthesis of the chorismate, which leads to the biosynthesis of aromatic amino acids. Catalyzes the reversible NADPH linked reduction of 3-dehydroshikimate (DHSA) to yield shikimate (SA)	OG0001211	inorganic		-	OG0000627	TIGRFAM Sua5 YciO YrdC YwlC family protein	OG0001743	Domain of unknown function (DUF3458_C) ARM repeats		-
OG0000010	Major facilitator superfamily	OG0000653	Integral membrane protein DUF106	OG0000802	Protein of unknown function (DUF2769)		-	OG0000629	Serine Threonine protein kinase	OG0001748	HAMP domain		-
OG0000053	mechanosensitive ion channel	OG0000657	One of the primary rRNA binding proteins, it binds specifically to the 5'-end of 16S ribosomal RNA	OG0001257	Catalyzes two subsequent steps in gluconeogenesis the aldol condensation of dihydroxyacetone phosphate (DHAP) and glyceraldehyde-3-phosphate (GA3P) to fructose-1,6-bisphosphate (FBP), and the dephosphorylation of FBP to fructose-6-phosphate (F6P)		-	OG0000630	archaeal coiled-coil protein	OG0001751	-		-
OG0000131	PFAM pyridoxamine 5'-phosphate oxidase-related FMN-binding	OG0000691	PFAM Diphthamide synthesis DPH2 protein	OG0000752	transcription activator, effector binding		-	OG0000632	Transfers a GMP moiety from GTP to Mo-molybdopterin (Mo- MPT) cofactor (Moco or molybdenum cofactor) to form Mo- molybdopterin guanine dinucleotide (Mo-MGD) cofactor	OG0001804	Zinc-uptake complex component A periplasmic		-
OG0000135	Part of the RFC clamp loader complex which loads the PCNA sliding clamp onto DNA	OG0000701	Involved in allosteric regulation of aspartate carbamoyltransferase	OG0000281	helix_turn_helix multiple antibiotic resistance protein		-	OG0000634	Belongs to the purine pyrimidine phosphoribosyltransferase family	OG0001885	Pyridoxamine 5'-phosphate oxidase		-
OG0000279	PFAM band 7 protein	OG0000707	Hydantoinase/oxoprolinase	OG0000350	COG0589 Universal stress protein UspA and related nucleotide-binding proteins		-	OG0000635	Specifically methylates the uridine in position 2552 of 23S rRNA at the 2'-O position of the ribose in the fully assembled 50S ribosomal subunit	OG0001915	Protein of unknown function (DUF3795)		-
OG0000294	PFAM UBA THIF-type NAD FAD binding protein	OG0000719	Belongs to the eukaryotic ribosomal protein eS6 family	OG0001021	PFAM Methyltransferase type		-	OG0000637	Tetrapolymerization of the monopyrrole PBG into the hydroxymethylbilane pre-uroporphyrinogen in several discrete steps	OG0001916	Phosphofructokinase		-
OG0000301	YcaO cyclodehydratase, ATP-ad Mg2+-binding	OG0000723	Binds to 23S rRNA. Forms part of two intersubunit bridges in the 70S ribosome	OG0001113	extracellular matrix structural constituent		-	OG0000638	Belongs to the class-III pyridoxal-phosphate-dependent aminotransferase family. HemL subfamily	OG0001921	GlcNAc-PI de-N-acetylase		-
OG0000306	Produces ATP from ADP in the presence of a proton gradient across the membrane	OG0000734	RNA polymerase that catalyzes the synthesis of short RNA molecules used as primers for DNA polymerase during DNA replication	OG0000529	Papain family cysteine protease		-	OG0000646	1-(5-phosphoribosyl)-5- (5-phosphoribosylamino)methylideneamino imidazole-4-carboxamide isomerase	OG0001923	Glycosyl transferase 4-like domain		-
OG0000361	Is required not only for elongation of protein synthesis but also for the initiation of all mRNA translation through initiator tRNA(fMet) aminoacylation	OG0000735	binds to the 23S rRNA	OG0000751	-		-	OG0000652	Catalyzes the oxidative deamination and cyclization of 2-amino-3,7-dideoxy-D-threo-hept-6-ulosonic acid (ADH) to yield 3- dehydroquinate (DHQ), which is fed into the canonical shikimic pathway of aromatic amino acid biosynthesis	OG0001938	Helix-turn-helix domain		-
OG0000366	PFAM Transmembrane exosortase (Exosortase_EpsH)	OG0000745	-	OG0001149	Catalyzes the reduction of hydroxylamine to form NH(3) and H(2)O		-	OG0000659	-	OG0001952	RNA recognition motif		-
OG0000385	PAC2 family	OG0000765	PFAM Like-Sm ribonucleoprotein, core	OG0001235	Glycosyl transferases group 1		-	OG0000660	-	OG0002083	Fe-S-cluster oxidoreductase		-
OG0000408	phosphoribosylformylglycinamidine synthase	OG0000768	aspartate ornithine carbamoyltransferase, carbamoyl-P binding domain	OG0001294	ABC-type molybdate transport system periplasmic component		-	OG0000667	PAC2 family	OG0002096	-		-
OG0000474	Catalyzes amidations at positions B, D, E, and G on adenosylcobyrinic A,C-diamide. NH(2) groups are provided by glutamine, and one molecule of ATP is hydrogenolyzed for each amidation	OG0000782	Catalyzes the transfer of diphosphate from ATP to 6- hydroxymethyl-7,8-dihydropterin (6-HMD), leading to 6- hydroxymethyl-7,8-dihydropterin diphosphate (6-HMDP)	OG0001580	TIGRFAM MIP family channel		-	OG0000670	-	OG0002098	-		-
OG0000494	PFAM AIR synthase related protein	OG0000783	One of two assembly initiator proteins, it binds directly to the 5'-end of the 23S rRNA, where it nucleates assembly of the 50S subunit	OG0001285	Possibly the antitoxin component of a		-	OG0000681	Molecular chaperone capable of stabilizing a range of proteins. Seems to fulfill an ATP-independent, HSP70-like function in archaeal de novo protein folding	OG0002110	COG3857 ATP-dependent nuclease, subunit B		-
OG0000538	-	OG0000784	Belongs to the universal ribosomal protein uL29 family	OG0001479	COG0433 Predicted ATPase		-	OG0000687	PFAM pyruvate ferredoxin flavodoxin oxidoreductase	OG0002189	PFAM transglutaminase domain protein		-
OG0000576	Involved in the third step of the chorismate pathway, which leads to the biosynthesis of aromatic amino acids. Catalyzes the cis-dehydration of 3-dehydroquinate (DHQ) and introduces the first double bond of the aromatic ring to yield 3- dehydroshikimate	OG0000792	PFAM PRC-barrel domain	OG0001522	Has nucleotide phosphatase activity towards ATP, GTP, CTP, TTP and UTP. May hydrolyze nucleoside diphosphates with lower efficiency		-	OG0000689	Sliding clamp subunit that acts as a moving platform for DNA processing. Responsible for tethering the catalytic subunit of DNA polymerase and other proteins to DNA during high-speed replication	OG0002216	PFAM Xylose isomerase domain protein TIM barrel		-
OG0000583	TIGRFAM UbiD family	OG0000798	PFAM CBS domain containing protein	OG0001204	membrane-bound metal-dependent hydrolase		-	OG0000694	Catalyzes the hydrolysis of glutamine to glutamate and ammonia as part of the biosynthesis of pyridoxal 5'-phosphate. The resulting ammonia molecule is channeled to the active site of PdxS	OG0002245	-		-
OG0000598	Hydrolase	OG0000010	Major facilitator superfamily	OG0001413	Protein of unknown function, DUF488		-	OG0000713	Belongs to the RNA polymerase beta chain family	OG0002432	COG1226 Kef-type K transport systems		-
OG0000634	Belongs to the purine pyrimidine phosphoribosyltransferase family	OG0000053	mechanosensitive ion channel	OG0001067	Binding-protein-dependent transport system inner membrane component		-	OG0000714	Functions by promoting the formation of the first peptide bond	OG0002462	Belongs to the phosphoglycerate kinase family		-
OG0000635	Specifically methylates the uridine in position 2552 of 23S rRNA at the 2'-O position of the ribose in the fully assembled 50S ribosomal subunit	OG0000131	PFAM pyridoxamine 5'-phosphate oxidase-related FMN-binding	OG0001421	Catalyzes the interconversion of 2-phosphoglycerate and 3-phosphoglycerate		-	OG0000715	methanogenesis marker protein 7	OG0002505	Flagellin is the subunit protein which polymerizes to form the filaments of archaeal flagella		-
OG0000652	Catalyzes the oxidative deamination and cyclization of 2-amino-3,7-dideoxy-D-threo-hept-6-ulosonic acid (ADH) to yield 3- dehydroquinate (DHQ), which is fed into the canonical shikimic pathway of aromatic amino acid biosynthesis	OG0000135	Part of the RFC clamp loader complex which loads the PCNA sliding clamp onto DNA	OG0001486	Catalase		-	OG0000716	Uncharacterized protein conserved in archaea (DUF2113)	OG0000160	Bacterial extracellular solute-binding proteins, family 5 Middle		-
OG0000660	-	OG0000279	PFAM band 7 protein	OG0001585	Domain of unknown function (DUF389)		-	OG0000720	PFAM PUA domain containing protein	OG0000218	PFAM CobN magnesium chelatase		-
OG0000689	Sliding clamp subunit that acts as a moving platform for DNA processing. Responsible for tethering the catalytic subunit of DNA polymerase and other proteins to DNA during high-speed replication	OG0000294	PFAM UBA THIF-type NAD FAD binding protein	OG0001630	peptidase dimerisation domain		-	OG0000721	Pfam:DUF552	OG0000298	membrane-associated protein domain		-
OG0000694	Catalyzes the hydrolysis of glutamine to glutamate and ammonia as part of the biosynthesis of pyridoxal 5'-phosphate. The resulting ammonia molecule is channeled to the active site of PdxS	OG0000301	YcaO cyclodehydratase, ATP-ad Mg2+-binding	OG0000776	Domain of unknown function (DUF4277)		-	OG0000727	One of the primary rRNA binding proteins, it binds directly near the 3'-end of the 23S rRNA, where it nucleates assembly of the 50S subunit	OG0000327	Binding-protein-dependent transport system inner membrane component		-
OG0000716	Uncharacterized protein conserved in archaea (DUF2113)	OG0000306	Produces ATP from ADP in the presence of a proton gradient across the membrane	OG0001709	BadF/BadG/BcrA/BcrD ATPase family		-	OG0000739	pre-rRNA processing protein involved in ribosome biogenesis	OG0000479	ABC-type dipeptide oligopeptide nickel transport systems, permease components		-
OG0000739	pre-rRNA processing protein involved in ribosome biogenesis	OG0000361	Is required not only for elongation of protein synthesis but also for the initiation of all mRNA translation through initiator tRNA(fMet) aminoacylation	OG0001778	PFAM Adenosine specific kinase		-	OG0000741	phosphoribosylformylglycinamidine synthase activity	OG0001108	-		-
OG0000759	Belongs to the thymidylate synthase family. Archaeal- type ThyA subfamily	OG0000366	PFAM Transmembrane exosortase (Exosortase_EpsH)	OG0001785	Prevents misfolding and promotes the refolding and proper assembly of unfolded polypeptides generated under stress conditions		-	OG0000743	Protein of unknown function (DUF447)	OG0001117	Toxic component of a toxin-antitoxin (TA) module. An RNase		-
OG0000786	Met-10+ like-protein	OG0000385	PAC2 family	OG0000995	Reverse transcriptase (RNA-dependent DNA polymerase)		-	OG0000746	-	OG0001155	Putative small multi-drug export protein		-
OG0000809	Involved in the gluconeogenesis. Catalyzes stereospecifically the conversion of dihydroxyacetone phosphate (DHAP) to D-glyceraldehyde-3-phosphate (G3P)	OG0000408	phosphoribosylformylglycinamidine synthase	OG0001507	Domain of unknown function (DUF4870)		-	OG0000747	Part of ribonuclease P, a protein complex that generates mature tRNA molecules by cleaving their 5'-ends	OG0001192	CGGC		-
OG0000811	PFAM PRC-barrel domain	OG0000474	Catalyzes amidations at positions B, D, E, and G on adenosylcobyrinic A,C-diamide. NH(2) groups are provided by glutamine, and one molecule of ATP is hydrogenolyzed for each amidation	OG0001693	Small Multidrug Resistance protein		-	OG0000748	Belongs to the eukaryotic ribosomal protein eL15 family	OG0001196	Cytochrome C biogenesis protein transmembrane region		-
OG0000815	Formation of pseudouridine at positions 38, 39 and 40 in the anticodon stem and loop of transfer RNAs	OG0000494	PFAM AIR synthase related protein	OG0001806	Belongs to the class-I aminoacyl-tRNA synthetase family		-	OG0000749	binds to the 23S rRNA	OG0001216	MTH865-like family		-
OG0000826	Part of ribonuclease P, a protein complex that generates mature tRNA molecules by cleaving their 5'-ends	OG0000538	-	OG0001931	Uncharacterized protein conserved in archaea (DUF2121)		-	OG0000750	Carbamoyl-phosphate synthase, small chain	OG0001231	ABC-type branched-chain amino acid transport systems ATPase component		-
OG0000830	Could be responsible for synthesis of pseudouridine from uracil-13 in transfer RNAs	OG0000576	Involved in the third step of the chorismate pathway, which leads to the biosynthesis of aromatic amino acids. Catalyzes the cis-dehydration of 3-dehydroquinate (DHQ) and introduces the first double bond of the aromatic ring to yield 3- dehydroshikimate	OG0001935	Binds to Cpn60 in the presence of Mg-ATP and suppresses the ATPase activity of the latter		-	OG0000757	Catalyzes the formation of 4-(hydroxymethyl)-2- furancarboxaldehyde phosphate (4-HFC-P) from two molecules of glyceraldehyde-3-P (GA-3-P)	OG0001320	Nucleotidyltransferase domain		-
OG0000190	The key enzymatic reactions in nitrogen fixation are catalyzed by the nitrogenase complex, which has 2 components the iron protein and the molybdenum-iron protein	OG0000583	TIGRFAM UbiD family	OG0001694	-		-	OG0000759	Belongs to the thymidylate synthase family. Archaeal- type ThyA subfamily	OG0001352	Family of unknown function (DUF5320)		-
OG0000253	Phosphate uptake regulator, PhoU	OG0000598	Hydrolase	OG0001932	SMART Elongator protein 3 MiaB NifB		-	OG0000766	KH domain protein	OG0001373	PFAM DsrE family protein		-
OG0000382	-	OG0000634	Belongs to the purine pyrimidine phosphoribosyltransferase family	OG0001404	Eco57I restriction-modification methylase		-	OG0000769	Specifically catalyzes the AdoMet-dependent 2'-O-ribose methylation of cytidine at position 56 in tRNAs	OG0001380	-		-
OG0000492	PFAM GHMP kinase	OG0000635	Specifically methylates the uridine in position 2552 of 23S rRNA at the 2'-O position of the ribose in the fully assembled 50S ribosomal subunit	OG0001602	TPR repeat		-	OG0000771	IGPS catalyzes the conversion of PRFAR and glutamine to IGP, AICAR and glutamate. The HisH subunit provides the glutamine amidotransferase activity that produces the ammonia necessary to HisF for the synthesis of IGP and AICAR	OG0001389	Peptidase domain protein		-
OG0000717	Uncharacterized protein conserved in archaea (DUF2102)	OG0000652	Catalyzes the oxidative deamination and cyclization of 2-amino-3,7-dideoxy-D-threo-hept-6-ulosonic acid (ADH) to yield 3- dehydroquinate (DHQ), which is fed into the canonical shikimic pathway of aromatic amino acid biosynthesis	OG0001780	TIGRFAM CRISPR-associated protein Cas4		-	OG0000780	PFAM CBS domain containing protein	OG0001396	NAD(P)H dehydrogenase (quinone) activity		-
OG0000755	Catalyzes the decarboxylation of orotidine 5'- monophosphate (OMP) to uridine 5'-monophosphate (UMP)	OG0000660	-	OG0002120	Protein of unknown function (DUF1847)		-	OG0000781	Involved in the binding of tRNA to the ribosomes	OG0001399	-		-
OG0000767	Belongs to the acetylglutamate kinase family. ArgB subfamily	OG0000689	Sliding clamp subunit that acts as a moving platform for DNA processing. Responsible for tethering the catalytic subunit of DNA polymerase and other proteins to DNA during high-speed replication	OG0002203	Type II/IV secretion system protein		-	OG0000785	Binds to 23S rRNA. One of the proteins that surrounds the polypeptide exit tunnel on the outside of the ribosome	OG0001414	acid phosphatase activity		-
OG0000797	PFAM GTP-binding protein HSR1-related	OG0000694	Catalyzes the hydrolysis of glutamine to glutamate and ammonia as part of the biosynthesis of pyridoxal 5'-phosphate. The resulting ammonia molecule is channeled to the active site of PdxS	OG0002210	-		-	OG0000786	Met-10+ like-protein	OG0001512	Cysteine synthase A		-
OG0000810	Catalyzes the conversion of (8S)-3',8-cyclo-7,8- dihydroguanosine 5'-triphosphate to cyclic pyranopterin monophosphate (cPMP)	OG0000716	Uncharacterized protein conserved in archaea (DUF2113)	OG0002313	phosphoserine phosphatase activity		-	OG0000789	SMART regulatory protein, Crp	OG0001539	SMART zinc finger, CDGSH-type domain protein		-
OG0000824	PFAM Prephenate dehydrogenase	OG0000739	pre-rRNA processing protein involved in ribosome biogenesis	OG0001292	-		-	OG0000796	TIGRFAM small GTP-binding protein	OG0001547	4-amino-4-deoxy-alpha-L-arabinopyranosyl undecaprenyl phosphate biosynthetic process		-
OG0000843	Uncharacterized protein conserved in archaea (DUF2240)	OG0000759	Belongs to the thymidylate synthase family. Archaeal- type ThyA subfamily	OG0001424	Lamin Tail Domain		-	OG0000809	Involved in the gluconeogenesis. Catalyzes stereospecifically the conversion of dihydroxyacetone phosphate (DHAP) to D-glyceraldehyde-3-phosphate (G3P)	OG0001600	ABC-2 type transporter		-
OG0000852	Nucleotidase that shows phosphatase activity on nucleoside 5'-monophosphates	OG0000786	Met-10+ like-protein	OG0001817	flagella protein		-	OG0000811	PFAM PRC-barrel domain	OG0001803	ATPases associated with a variety of cellular activities		-
OG0000860	DNA-dependent RNA polymerase catalyzes the transcription of DNA into RNA using the four ribonucleoside triphosphates as substrates	OG0000809	Involved in the gluconeogenesis. Catalyzes stereospecifically the conversion of dihydroxyacetone phosphate (DHAP) to D-glyceraldehyde-3-phosphate (G3P)	OG0001847	Phospholipase_D-nuclease N-terminal		-	OG0000815	Formation of pseudouridine at positions 38, 39 and 40 in the anticodon stem and loop of transfer RNAs	OG0001808	COG2141 Coenzyme F420-dependent N5,N10-methylene tetrahydromethanopterin reductase and related flavin-dependent oxidoreductases		-
OG0000072	Coenzyme F420 hydrogenase dehydrogenase, beta subunit	OG0000811	PFAM PRC-barrel domain	OG0001934	-		-	OG0000816	TIGRFAM siroheme synthase	OG0001821	DEAD-like helicases superfamily		-
OG0000096	PFAM regulatory protein, ArsR	OG0000815	Formation of pseudouridine at positions 38, 39 and 40 in the anticodon stem and loop of transfer RNAs	OG0002012	Phage tail protein (Tail_P2_I)		-	OG0000819	in RNase L inhibitor, RLI	OG0001843	RibD C-terminal domain		-
OG0000142	Nitrite sulfite reductase, hemoprotein beta-component, ferrodoxin domain protein	OG0000826	Part of ribonuclease P, a protein complex that generates mature tRNA molecules by cleaving their 5'-ends	OG0002062	Catalyzes the attachment of pyrrolysine to tRNA(Pyl). Pyrrolysine is a lysine derivative encoded by the termination codon UAG		-	OG0000826	Part of ribonuclease P, a protein complex that generates mature tRNA molecules by cleaving their 5'-ends	OG0001857	COG0559 Branched-chain amino acid ABC-type transport system, permease components		-
OG0000257	PFAM binding-protein-dependent transport systems inner membrane component	OG0000830	Could be responsible for synthesis of pseudouridine from uracil-13 in transfer RNAs	OG0002095	-		-	OG0000830	Could be responsible for synthesis of pseudouridine from uracil-13 in transfer RNAs	OG0001863	Protein of unknown function (DUF1254)		-
OG0000287	Domain of unknown function (DUF1743)	OG0000190	The key enzymatic reactions in nitrogen fixation are catalyzed by the nitrogenase complex, which has 2 components the iron protein and the molybdenum-iron protein	OG0002144	-		-	OG0000840	Belongs to the archaeal rpoM eukaryotic RPA12 RPB9 RPC11 RNA polymerase family	OG0001879	-		-
OG0000454	Required for chromosome condensation and partitioning	OG0000253	Phosphate uptake regulator, PhoU	OG0002205	-		-	OG0000841	tRNAHis guanylyltransferase	OG0001912	Branched-chain amino acid transport system permease component		-
OG0000486	SMART Elongator protein 3 MiaB NifB	OG0000382	-	OG0002269	-		-	OG0000847	Belongs to the ALAD family	OG0001922	-		-
OG0000601	Belongs to the glyceraldehyde-3-phosphate dehydrogenase family	OG0000492	PFAM GHMP kinase	OG0002282	Family of unknown function (DUF5402)		-	OG0000877	PFAM Ribosomal protein S27E	OG0001926	-		-
OG0000738	radical SAM domain protein	OG0000717	Uncharacterized protein conserved in archaea (DUF2102)	OG0002303	Metal dependent phosphohydrolases with conserved 'HD' motif.		-	OG0000890	Protein of unknown function (DUF473)	OG0001929	Domain in cystathionine beta-synthase and other proteins.		-
OG0000876	Belongs to the UPF0107 family	OG0000755	Catalyzes the decarboxylation of orotidine 5'- monophosphate (OMP) to uridine 5'-monophosphate (UMP)	OG0002318	-		-	OG0000893	Sjogren's syndrome/scleroderma autoantigen 1 (Autoantigen p27)	OG0001946	membrane protein of uknown function UCP014873		-
OG0000217	Molybdopterin converting factor, small subunit	OG0000767	Belongs to the acetylglutamate kinase family. ArgB subfamily	OG0002324	PFAM GvpD gas vesicle		-	OG0000896	binds to the 23S rRNA	OG0001984	Receptor family ligand binding region		-
OG0000370	Plays a role in the regulation of phosphate uptake	OG0000797	PFAM GTP-binding protein HSR1-related	OG0002352	Predicted metal-binding protein (DUF2103)		-	OG0000897	PFAM methyltransferase small	OG0002024	Part of the high-affinity ATP-driven potassium transport (or Kdp) system, which catalyzes the hydrolysis of ATP coupled with the electrogenic transport of potassium into the cytoplasm. This subunit		-
OG0000905	Uncharacterized protein conserved in archaea (DUF2073)	OG0000810	Catalyzes the conversion of (8S)-3',8-cyclo-7,8- dihydroguanosine 5'-triphosphate to cyclic pyranopterin monophosphate (cPMP)	OG0002353	ATP-grasp domain		-	OG0000942	-	OG0002025	-		-
OG0000186	PBP superfamily domain	OG0000824	PFAM Prephenate dehydrogenase	OG0002356	-		-	OG0000988	adenylyl cyclase CyaB	OG0002027	Glyoxalase-like domain		-
OG0000831	PFAM isocitrate isopropylmalate dehydrogenase	OG0000843	Uncharacterized protein conserved in archaea (DUF2240)	OG0002364	Bacterial fructose-1,6-bisphosphatase, glpX-encoded		-	OG0001004	coenzyme F420-reducing hydrogenase, delta subunit	OG0002099	Endonuclease related to archaeal Holliday junction resolvase		-
OG0000041	TIGRFAM ATPase, P-type (transporting), HAD superfamily, subfamily IC	OG0000852	Nucleotidase that shows phosphatase activity on nucleoside 5'-monophosphates	OG0002368	-		-	OG0001012	NIF3 (NGG1p interacting factor 3)	OG0002164	-		-
OG0000380	Catalyzes the transfer of the phosphoribosyl group of 5- phosphorylribose-1-pyrophosphate (PRPP) to anthranilate to yield N-(5'-phosphoribosyl)-anthranilate (PRA)	OG0000860	DNA-dependent RNA polymerase catalyzes the transcription of DNA into RNA using the four ribonucleoside triphosphates as substrates	OG0002369	-		-	OG0001134	TIGRFAM hydrogenase expression formation protein HypE	OG0002172	COG2041 Sulfite oxidase and related enzymes		-
OG0000901	Catalyzes the methylation of C-15 in cobalt-precorrin-6B followed by the decarboxylation of C-12 to form cobalt-precorrin- 7	OG0000072	Coenzyme F420 hydrogenase dehydrogenase, beta subunit	OG0002370	-		-	OG0001150	PFAM amino acid-binding ACT domain protein	OG0002212	ABC 3 transport family		-
OG0000919	PFAM beta-lactamase domain protein	OG0000096	PFAM regulatory protein, ArsR	OG0002371	Pfam:DUF258		-	OG0001179	TIGRFAM hydrogenase accessory protein HypB	OG0002219	GtrA family		-
OG0000946	PFAM Methyl-coenzyme M reductase operon protein C	OG0000142	Nitrite sulfite reductase, hemoprotein beta-component, ferrodoxin domain protein	OG0002372	Dihydrouridine synthase (Dus)		-	OG0001198	TIGRFAM hydrogenase expression formation protein HypD	OG0002239	Serine Threonine protein kinase		-
OG0000026	Pfam:KaiC	OG0000257	PFAM binding-protein-dependent transport systems inner membrane component	OG0002373	S-layer protein		-	OG0000007	PFAM response regulator receiver	OG0002300	Cytochrome C biogenesis protein transmembrane region		-
OG0000394	RimK domain protein ATP-grasp	OG0000287	Domain of unknown function (DUF1743)	OG0002389	Carboxymuconolactone decarboxylase family		-	OG0000028	ATPases associated with a variety of cellular activities	OG0002382	Catalyzes the attachment of serine to tRNA(Ser). Is also able to aminoacylate tRNA(Sec) with serine, to form the misacylated tRNA L-seryl-tRNA(Sec), which will be further converted into selenocysteinyl-tRNA(Sec)		-
OG0000856	PFAM Uroporphyrin-III C tetrapyrrole (Corrin Porphyrin) methyltransferase	OG0000454	Required for chromosome condensation and partitioning	OG0002393	Archaeal flagellar protein F		-	OG0000046	AMP-binding enzyme C-terminal domain	OG0002414	PFAM Carboxymuconolactone decarboxylase		-
OG0000902	PFAM Uroporphyrin-III C tetrapyrrole (Corrin Porphyrin) methyltransferase	OG0000486	SMART Elongator protein 3 MiaB NifB	OG0002401	-		-	OG0000048	type II secretion system protein	OG0002431	UbiA prenyltransferase family		-
OG0000920	TIGRFAM glutamine amidotransferase of anthranilate synthase	OG0000601	Belongs to the glyceraldehyde-3-phosphate dehydrogenase family	OG0001150	PFAM amino acid-binding ACT domain protein		-	OG0000062	Belongs to the P(II) protein family	OG0002433	-		-
OG0000127	cellular potassium ion transport	OG0000738	radical SAM domain protein	OG0000403	Belongs to the UPF0305 family		-	OG0000070	Putative zinc- or iron-chelating domain	OG0002503	-		-
OG0000143	Pfam:UPF0118	OG0000876	Belongs to the UPF0107 family	OG0001214	COG0433 Predicted ATPase		-	OG0000076	Flavodoxin	OG0002508	-		-
OG0000116	PFAM glutamate synthase alpha subunit domain protein	OG0000217	Molybdopterin converting factor, small subunit	OG0000949	Uncharacterized membrane protein (DUF2298)		-	OG0000097	PFAM type II secretion system protein E	OG0002521	SMART Metal-dependent phosphohydrolase, HD region		-
OG0000156	Formylmethanofuran dehydrogenase subunit A	OG0000370	Plays a role in the regulation of phosphate uptake	OG0001251	phosphoribosyl-ATP pyrophosphohydrolase		-	OG0000108	PFAM regulatory protein AsnC Lrp family	OG0002522	-		-
OG0000278	IGPS catalyzes the conversion of PRFAR and glutamine to IGP, AICAR and glutamate. The HisF subunit catalyzes the cyclization activity that produces IGP and AICAR from PRFAR using the ammonia provided by the HisH subunit	OG0000905	Uncharacterized protein conserved in archaea (DUF2073)	OG0001252	Mut7-C RNAse domain		-	OG0000109	PFAM Aldehyde dehydrogenase	OG0002598	defense response to virus		-
OG0000356	PFAM Aminotransferase class I and II	OG0000186	PBP superfamily domain	OG0001119	PFAM Ribonuclease III		-	OG0000120	AAA-like domain	OG0002600	-		-
OG0000422	PFAM PilT protein domain protein	OG0000831	PFAM isocitrate isopropylmalate dehydrogenase	OG0000188	Roadblock LC7 family protein		-	OG0000121	Thiol-specific peroxidase that catalyzes the reduction of hydrogen peroxide and organic hydroperoxides to water and alcohols, respectively. Plays a role in cell protection against oxidative stress by detoxifying peroxides	OG0002601	Prokaryotic RING finger family 2		-
OG0000643	Converts GTP to 7,8-dihydro-D-neopterin 2',3'-cyclic phosphate, the first intermediate in the biosynthesis of coenzyme methanopterin	OG0000041	TIGRFAM ATPase, P-type (transporting), HAD superfamily, subfamily IC	OG0000208	stage II sporulation		-	OG0000125	COG1361 S-layer domain	OG0002604	peptidyl-tyrosine sulfation		-
OG0000729	Located on the platform of the 30S subunit	OG0000380	Catalyzes the transfer of the phosphoribosyl group of 5- phosphorylribose-1-pyrophosphate (PRPP) to anthranilate to yield N-(5'-phosphoribosyl)-anthranilate (PRA)	OG0001006	Catalyzes the conversion of GDP-D-mannose to GDP-4- dehydro-6-deoxy-D-mannose		-	OG0000137	Uncharacterised protein family UPF0066	OG0002606	-		-
OG0000773	Promotes the exchange of GDP for GTP in EF-1-alpha GDP, thus allowing the regeneration of EF-1-alpha GTP that could then be used to form the ternary complex EF-1-alpha GTP AAtRNA	OG0000901	Catalyzes the methylation of C-15 in cobalt-precorrin-6B followed by the decarboxylation of C-12 to form cobalt-precorrin- 7	OG0001256	Protein of unknown function (DUF432)		-	OG0000145	PFAM metal-dependent phosphohydrolase, HD sub domain	OG0000169	Transposase domain (DUF772)		-
OG0000775	Transcription elongation factor Spt4	OG0000919	PFAM beta-lactamase domain protein	OG0000800	Transcriptional regulator PadR-like family		-	OG0000163	Ammonium Transporter	OG0000199	PhoD-like phosphatase		-
OG0000087	iron dependent repressor	OG0000946	PFAM Methyl-coenzyme M reductase operon protein C	OG0000862	PFAM Yip1 domain		-	OG0000172	Cysteine desulfurase	OG0000936	AAA domain (dynein-related subfamily)		-
OG0000140	PFAM Rubrerythrin	OG0000026	Pfam:KaiC	OG0001312	Membrane bound hydrogenase		-	OG0000173	heterodisulfide reductase subunit C	OG0001022	ParE toxin of type II toxin-antitoxin system, parDE		-
OG0000166	Uncharacterised ArCR, COG2043	OG0000394	RimK domain protein ATP-grasp	OG0000985	AAA ATPase domain		-	OG0000190	The key enzymatic reactions in nitrogen fixation are catalyzed by the nitrogenase complex, which has 2 components the iron protein and the molybdenum-iron protein	OG0001140	-		-
OG0000177	transcription factor (CBF NF-Y)	OG0000856	PFAM Uroporphyrin-III C tetrapyrrole (Corrin Porphyrin) methyltransferase	OG0001030	HEPN domain		-	OG0000205	PFAM Tetrahydromethanopterin S-methyltransferase MtrH subunit	OG0001147	Toxic component of a toxin-antitoxin (TA) module. An RNase		-
OG0000285	Archaeal Nre, N-terminal	OG0000902	PFAM Uroporphyrin-III C tetrapyrrole (Corrin Porphyrin) methyltransferase	OG0001222	MafB19-like deaminase		-	OG0000233	PFAM CoA-binding domain protein	OG0001333	Glycoside hydrolase family 28		-
OG0000540	Belongs to the phosphoglycerate kinase family	OG0000920	TIGRFAM glutamine amidotransferase of anthranilate synthase	OG0001508	binds to the 23S rRNA		-	OG0000234	Methanogenesis marker protein 8	OG0001334	Subtilase family		-
OG0000702	TIGRFAM argininosuccinate lyase	OG0000127	cellular potassium ion transport	OG0001526	Belongs to the carbamate kinase family		-	OG0000253	Phosphate uptake regulator, PhoU	OG0001361	Trypsin		-
OG0000778	Component of the proteasome core, a large protease complex with broad specificity involved in protein degradation	OG0000143	Pfam:UPF0118	OG0001474	Pirin		-	OG0000262	TIGRFAM intracellular protease, PfpI family	OG0001370	von willebrand factor, type A		-
OG0000799	PFAM Archease protein family (DUF101 UPF0211)	OG0000964	able to aminoacylate tRNA(Sec) with serine, to form the misacylated tRNA L-seryl-tRNA(Sec), which will be further converted into selenocysteinyl-tRNA(Sec)	OG0001543	Uncharacterised ACR (DUF711)		-	OG0000263	Protein of unknown function DUF116	OG0001388	COG2146 Ferredoxin subunits of nitrite reductase and ring-hydroxylating dioxygenases		-
OG0000814	-	OG0000397	Protein of unknown function DUF58	OG0001589	D-fructose-1,6-bisphosphate 1-phosphohydrolase class 1		-	OG0000267	Belongs to the glutamate synthase family	OG0001466	-		-
OG0000821	Converts cobyric acid to cobinamide by the addition of aminopropanol on the F carboxylic group	OG0001042	Gar1/Naf1 RNA binding region	OG0001643	Belongs to the UPF0237 family		-	OG0000269	Domain of unknown function (DUF1894)	OG0001482	-		-
OG0000834	TIGRFAM riboflavin synthase	OG0000236	SMART regulatory protein AsnC Lrp family	OG0001586	2TM domain		-	OG0000274	Involved in regulation of DNA replication	OG0001488	PFAM PKD domain		-
OG0000189	Produces ATP from ADP in the presence of a proton gradient across the membrane	OG0001071	Part of a complex that catalyzes the reversible cleavage of acetyl-CoA, allowing autotrophic growth from CO(2). The alpha- epsilon subcomponent functions as a carbon monoxide dehydrogenase. The precise role of the epsilon subunit is unclear	OG0001669	Protein of unknown function (DUF1294)		-	OG0000293	Catalyzes the reversible transfer of a formyl group from formylmethanofuran (formyl-MFR) to tetrahydromethanopterin (H(4)MPT) so as to produce 5-formyl tetrahydromethanopterin (5- formyl-H(4)MPT) and methanofuran (MFR)	OG0001492	-		-
OG0000216	Seems to be required for maximal rate of protein biosynthesis. Enhances ribosome dissociation into subunits and stabilizes the binding of the initiator Met-tRNA(I) to 40 S ribosomal subunits	OG0000298	membrane-associated protein domain	OG0000311	Transposase, Mutator family		-	OG0000295	Catalyzes the formation of S-adenosylmethionine from methionine and ATP	OG0001585	Domain of unknown function (DUF389)		-
OG0000333	EndoIII-related endonuclease	OG0001250	RNA binding	OG0001675	Acetyltransferase (GNAT) family		-	OG0000296	CBS domain containing protein	OG0001609	TIGRFAM serine O-acetyltransferase		-
OG0000611	PFAM Methylated-DNA- protein -cysteine S-methyltransferase	OG0000686	Domain of unknown function	OG0001512	Cysteine synthase A		-	OG0000320	Uncharacterised protein family UPF0058	OG0001662	Flavodoxin-like fold		-
OG0000750	Carbamoyl-phosphate synthase, small chain	OG0001262	CDP-alcohol phosphatidyltransferase	OG0001388	COG2146 Ferredoxin subunits of nitrite reductase and ring-hydroxylating dioxygenases		-	OG0000330	Catalyzes the complex heterocyclic radical-mediated conversion of 6-carboxy-5,6,7,8-tetrahydropterin (CPH4) to 7- carboxy-7-deazaguanine (CDG), a step common to the biosynthetic pathways of all 7-deazapurine-containing compounds	OG0001687	Ku70 and Ku80 are 70kDa and 80kDa subunits of the Lupus Ku autoantigen		-
OG0000780	PFAM CBS domain containing protein	OG0001025	Non-histone chromosomal protein MC1	OG0001822	Shikimate kinase		-	OG0000336	haloacid dehalogenase-like hydrolase	OG0001688	to orf3 of fosmid clone 4B7mr3		-
OG0000819	in RNase L inhibitor, RLI	OG0001287	Protein of unknown function (DUF1246)	OG0001073	COG0553 Superfamily II DNA RNA helicases, SNF2 family		-	OG0000357	Calcineurin-like phosphoesterase superfamily domain	OG0001723	Endonuclease/Exonuclease/phosphatase family		-
OG0000847	Belongs to the ALAD family	OG0001229	5-methyltetrahydropteroyltriglutamate-homocysteine S-methyltransferase activity	OG0001101	Transposase DDE domain		-	OG0000367	DNA topoisomerase II activity	OG0001735	Protein of unknown function (DUF1722)		-
OG0000028	ATPases associated with a variety of cellular activities	OG0001295	-	OG0001169	Virulence protein RhuM family		-	OG0000382	-	OG0001742	SAF		-
OG0000076	Flavodoxin	OG0001248	-	OG0001601	Cleaves both 3' and 5' ssDNA extremities of branched DNA structures		-	OG0000395	amino acids such as threonine, to avoid such errors, it has a posttransfer editing activity that hydrolyzes mischarged Thr-tRNA(Val) in a tRNA-dependent manner	OG0001754	Activator of Hsp90 ATPase		-
OG0000712	Uncharacterized protein conserved in archaea (DUF2098)	OG0001297	Aerotolerance regulator N-terminal	OG0001765	Putative ATP-dependent Lon protease		-	OG0000436	B-block binding subunit of TFIIIC	OG0001789	PFAM SCP-like extracellular		-
OG0000756	PFAM thymidylate kinase	OG0001340	S-layer protein	OG0001132	COG3547 Transposase and inactivated derivatives		-	OG0000443	PFAM Radical SAM domain protein	OG0001791	Predicted membrane protein (DUF2206)		-
OG0000857	Uncharacterized protein conserved in archaea (DUF2150)	OG0000116	PFAM glutamate synthase alpha subunit domain protein	OG0001737	PFAM Peptidase S24 S26A S26B, conserved region		-	OG0000467	Citrate transporter	OG0001824	DNA photolyase		-
OG0000868	Protein of unknown function (DUF424)	OG0000156	Formylmethanofuran dehydrogenase subunit A	OG0001195	Domain of unknown function (DUF3368)		-	OG0000475	-	OG0001837	COG1541 Coenzyme F390 synthetase		-
OG0000869	Pfam:DUF137	OG0000278	IGPS catalyzes the conversion of PRFAR and glutamine to IGP, AICAR and glutamate. The HisF subunit catalyzes the cyclization activity that produces IGP and AICAR from PRFAR using the ammonia provided by the HisH subunit	OG0002008	ASCH		-	OG0000477	structural constituent of ribosome	OG0001939	Leucine carboxyl methyltransferase		-
OG0000027	PFAM ABC-2 type transporter	OG0000356	PFAM Aminotransferase class I and II	OG0002019	-		-	OG0000492	PFAM GHMP kinase	OG0001961	-		-
OG0000242	Uncharacterised protein family UPF0047	OG0000422	PFAM PilT protein domain protein	OG0002121	-		-	OG0000496	PFAM isocitrate isopropylmalate dehydrogenase	OG0001970	Glutathione synthase ribosomal protein S6 modification enzyme (Glutaminyl transferase)		-
OG0000699	PFAM dihydropteroate synthase, DHPS	OG0000643	Converts GTP to 7,8-dihydro-D-neopterin 2',3'-cyclic phosphate, the first intermediate in the biosynthesis of coenzyme methanopterin	OG0002139	MazG nucleotide pyrophosphohydrolase domain		-	OG0000501	Catalyzes the methyl esterification of L-isoaspartyl residues in peptides and proteins that result from spontaneous decomposition of normal L-aspartyl and L-asparaginyl residues. It plays a role in the repair and or degradation of damaged proteins	OG0001971	RimK-like ATPgrasp N-terminal domain		-
OG0000760	Belongs to the UPF0235 family	OG0000729	Located on the platform of the 30S subunit	OG0000930	low-complexity proteins		-	OG0000536	PFAM cyclase family protein	OG0001975	-		-
OG0000879	-	OG0000773	Promotes the exchange of GDP for GTP in EF-1-alpha GDP, thus allowing the regeneration of EF-1-alpha GTP that could then be used to form the ternary complex EF-1-alpha GTP AAtRNA	OG0001891	Protein of unknown function (DUF2283)		-	OG0000560	Catalyzes the formation of phosphoribosylamine from phosphoribosylpyrophosphate (PRPP) and glutamine	OG0001983	Acetyltransferase (GNAT) family		-
OG0000409	PFAM 4Fe-4S ferredoxin, iron-sulfur binding domain protein	OG0000775	Transcription elongation factor Spt4	OG0001666	-		-	OG0000591	Endonuclease that specifically degrades the RNA of RNA- DNA hybrids	OG0002047	PPIC-type PPIASE domain		-
OG0000788	Carbamoyl-phosphate synthetase large chain domain protein	OG0000087	iron dependent repressor	OG0001668	-		-	OG0000595	PFAM tRNA synthetase, class II (G, H, P and S)	OG0002057	Voltage gated chloride channel		-
OG0000827	TIGRFAM oxaloacetate decarboxylase alpha subunit	OG0000140	PFAM Rubrerythrin	OG0001764	-		-	OG0000621	PFAM Mur ligase, middle domain protein	OG0002091	FIST C domain		-
OG0000829	PHP C-terminal domain protein	OG0000166	Uncharacterised ArCR, COG2043	OG0001792	Peptidase S9 prolyl oligopeptidase active site domain protein		-	OG0000626	Catalyzes the attachment of tyrosine to tRNA(Tyr) in a two-step reaction tyrosine is first activated by ATP to form Tyr- AMP and then transferred to the acceptor end of tRNA(Tyr)	OG0002102	PFAM Glyoxalase bleomycin resistance protein dioxygenase		-
OG0000848	Domain of unknown function DUF83	OG0000177	transcription factor (CBF NF-Y)	OG0001895	PglZ domain		-	OG0000633	PIN domain of ribonuclease	OG0002140	Aldo/keto reductase family		-
OG0000867	-	OG0000285	Archaeal Nre, N-terminal	OG0001992	NYN domain		-	OG0000647	Uroporphyrin-III C tetrapyrrole (Corrin Porphyrin) methyltransferase	OG0002168	-		-
OG0000871	biotin lipoate A B protein ligase	OG0000540	Belongs to the phosphoglycerate kinase family	OG0002064	-		-	OG0000673	-	OG0002188	-		-
OG0000908	nucleic acid binding OB-fold tRNA helicase-type	OG0000702	TIGRFAM argininosuccinate lyase	OG0002125	DHHA1 domain		-	OG0000685	-	OG0002247	-		-
OG0000073	Belongs to the UDP-glucose GDP-mannose dehydrogenase family	OG0000778	Component of the proteasome core, a large protease complex with broad specificity involved in protein degradation	OG0002225	COG0191 Fructose tagatose bisphosphate aldolase		-	OG0000690	DNA-dependent RNA polymerase catalyzes the transcription of DNA into RNA using the four ribonucleoside triphosphates as substrates	OG0002287	-		-
OG0000806	The beta subunit is responsible for the synthesis of L- tryptophan from indole and L-serine	OG0000799	PFAM Archease protein family (DUF101 UPF0211)	OG0002232	-		-	OG0000704	eIF-2 functions in the early steps of protein synthesis by forming a ternary complex with GTP and initiator tRNA	OG0002342	-		-
OG0000906	TIGRFAM F420-dependent oxidoreductase	OG0000814	-	OG0002272	Uncharacterized protein conserved in archaea (DUF2110)		-	OG0000709	PFAM AAA ATPase central domain protein	OG0002384	4Fe-4S dicluster domain		-
OG0000922	Catalyzes the oxidation of 5,10- methylenetetrahydrofolate to 5,10-methenyltetrahydrofolate and then the hydrolysis of 5,10-methenyltetrahydrofolate to 10- formyltetrahydrofolate	OG0000821	Converts cobyric acid to cobinamide by the addition of aminopropanol on the F carboxylic group	OG0002277	-		-	OG0000712	Uncharacterized protein conserved in archaea (DUF2098)	OG0002397	Domain of unknown function (DUF4389)		-
OG0000931	TIGRFAM phosphoribosylaminoimidazolecarboxamide formyltransferase IMP cyclohydrolase	OG0000834	TIGRFAM riboflavin synthase	OG0002279	-		-	OG0000717	Uncharacterized protein conserved in archaea (DUF2102)	OG0002413	-		-
OG0000710	Part of a complex that catalyzes the formation of methyl-coenzyme M and tetrahydromethanopterin from coenzyme M and methyl-tetrahydromethanopterin. This is an energy-conserving, sodium-ion translocating step	OG0000189	Produces ATP from ADP in the presence of a proton gradient across the membrane	OG0002293	Mitochondrial biogenesis AIM24		-	OG0000737	methyltransferase activity	OG0002418	-		-
OG0000832	PFAM Methyl-coenzyme M reductase, beta subunit	OG0000216	Seems to be required for maximal rate of protein biosynthesis. Enhances ribosome dissociation into subunits and stabilizes the binding of the initiator Met-tRNA(I) to 40 S ribosomal subunits	OG0001773	-		-	OG0000742	Catalyzes the NADPH-dependent reduction of N-acetyl-5- glutamyl phosphate to yield N-acetyl-L-glutamate 5-semialdehyde	OG0002421	Short C-terminal domain		-
OG0000854	PFAM Methyl-coenzyme M reductase gamma subunit	OG0000333	EndoIII-related endonuclease	OG0002357	ABC-2 family transporter protein		-	OG0000744	Dihydrouridine synthase (Dus)	OG0002554	-		-
OG0000132	PFAM Cation	OG0000611	PFAM Methylated-DNA- protein -cysteine S-methyltransferase	OG0002403	-		-	OG0000755	Catalyzes the decarboxylation of orotidine 5'- monophosphate (OMP) to uridine 5'-monophosphate (UMP)	OG0002555	-		-
OG0000423	PFAM cobalamin (vitamin B12) biosynthesis CbiG protein	OG0000750	Carbamoyl-phosphate synthase, small chain	OG0002410	CoA-binding domain protein		-	OG0000756	PFAM thymidylate kinase	OG0002595	-		-
OG0000915	The alpha subunit is responsible for the aldol cleavage of indoleglycerol phosphate to indole and glyceraldehyde 3- phosphate	OG0000780	PFAM CBS domain containing protein	OG0001206	Flagellin is the subunit protein which polymerizes to form the filaments of archaeal flagella		-	OG0000767	Belongs to the acetylglutamate kinase family. ArgB subfamily	OG0002599	-		-
OG0000953	Domain in cystathionine beta-synthase and other proteins.	OG0000819	in RNase L inhibitor, RLI	OG0001606	-		-	OG0000774	Catalyzes the ATP-dependent conversion of 7-carboxy-7- deazaguanine (CDG) to 7-cyano-7-deazaguanine (preQ(0))	OG0002608	CBS domain		-
OG0000956	PFAM Precorrin-8X methylmutase CbiC CobH	OG0000847	Belongs to the ALAD family	OG0001663	Sulfatase-modifying factor enzyme 1		-	OG0000777	pfam nmd3	OG0002627	-		-
OG0000873	Part of a complex that catalyzes the formation of methyl-coenzyme M and tetrahydromethanopterin from coenzyme M and methyl-tetrahydromethanopterin. This is an energy-conserving, sodium-ion translocating step	OG0000028	ATPases associated with a variety of cellular activities	OG0001775	Dimethylamine methyltransferase (Dimeth_PyL)		-	OG0000787	Contacts the emerging nascent chain on the ribosome	OG0002631	EamA-like transporter family		-
OG0000937	Part of a complex that catalyzes the formation of methyl-coenzyme M and tetrahydromethanopterin from coenzyme M and methyl-tetrahydromethanopterin. This is an energy-conserving, sodium-ion translocating step	OG0000076	Flavodoxin	OG0001818	Catalyzes the transfer of a methyl group from dimethylamine to the corrinoid cofactor of MtbC		-	OG0000791	PFAM ribosomal protein S8E	OG0002632	-		-
OG0000183	DEAD DEAH box helicase domain protein	OG0000712	Uncharacterized protein conserved in archaea (DUF2098)	OG0001873	cellular alkane metabolic process		-	OG0000793	Belongs to the UPF0284 family	OG0002640	Non-catalytic component of the exosome, which is a complex involved in RNA degradation. Increases the RNA binding and the efficiency of RNA degradation. Helpful for the interaction of the exosome with A-poor RNAs		-
OG0000628	Produces ATP from ADP in the presence of a proton gradient across the membrane	OG0000756	PFAM thymidylate kinase	OG0002065	-		-	OG0000794	Prephenate dehydratase	OG0002749	-		-
OG0000728	DNA-dependent RNA polymerase catalyzes the transcription of DNA into RNA using the four ribonucleoside triphosphates as substrates	OG0000857	Uncharacterized protein conserved in archaea (DUF2150)	OG0002123	-		-	OG0000795	Helix-turn-helix domain protein	OG0002750	-		-
OG0000770	Protein of unknown function (DUF357)	OG0000868	Protein of unknown function (DUF424)	OG0002223	Trimethylamine methyltransferase (MTTB)		-	OG0000797	PFAM GTP-binding protein HSR1-related	OG0002755	-		-
OG0000813	H subunit	OG0000869	Pfam:DUF137	OG0002224	Catalyzes the transfer of a methyl group from trimethylamine to the corrinoid cofactor of MttC		-	OG0000810	Catalyzes the conversion of (8S)-3',8-cyclo-7,8- dihydroguanosine 5'-triphosphate to cyclic pyranopterin monophosphate (cPMP)	OG0002756	Nuclease-related domain		-
OG0000820	RNase L inhibitor, RLI	OG0000027	PFAM ABC-2 type transporter	OG0002271	-		-	OG0000822	DUF35 OB-fold domain, acyl-CoA-associated	OG0002760	-		-
OG0000825	Binds 16S rRNA, required for the assembly of 30S particles	OG0000242	Uncharacterised protein family UPF0047	OG0002307	-		-	OG0000823	Uncharacterized protein conserved in archaea (DUF2112)	OG0002788	-		-
OG0000835	Class II Aldolase and Adducin N-terminal domain	OG0000699	PFAM dihydropteroate synthase, DHPS	OG0002314	-		-	OG0000824	PFAM Prephenate dehydrogenase	OG0002790	-		-
OG0000605	PFAM ABC transporter	OG0000760	Belongs to the UPF0235 family	OG0002452	-		-	OG0000843	Uncharacterized protein conserved in archaea (DUF2240)	OG0001173	Glycosyl hydrolases family 15		-
OG0000679	Protein of unknown function DUF89	OG0000879	-	OG0002476	-		-	OG0000852	Nucleotidase that shows phosphatase activity on nucleoside 5'-monophosphates	OG0001238	to orf2, orf11, orf12, orf13, orf14, orf15 of fosmid clone 4B7mr3		-
OG0000736	Fumarase C-terminus	OG0000409	PFAM 4Fe-4S ferredoxin, iron-sulfur binding domain protein	OG0002477	Archaebacterial flagellin		-	OG0000857	Uncharacterized protein conserved in archaea (DUF2150)	OG0001249	Catalyzes the reduction of 1-pyrroline-5-carboxylate (PCA) to L-proline		-
OG0000790	Fe-S type, tartrate fumarate subfamily, alpha	OG0000788	Carbamoyl-phosphate synthetase large chain domain protein	OG0002484	-		-	OG0000860	DNA-dependent RNA polymerase catalyzes the transcription of DNA into RNA using the four ribonucleoside triphosphates as substrates	OG0001284	LVIVD repeat-containing protein		-
OG0000808	Belongs to the UPF0285 family	OG0000827	TIGRFAM oxaloacetate decarboxylase alpha subunit	OG0001201	Probably plays a role in a hydrogenase nickel cofactor insertion step		-	OG0000866	-	OG0001386	PEP-utilising enzyme, TIM barrel domain		-
OG0000066	Dimerisation domain of Zinc Transporter	OG0000829	PHP C-terminal domain protein	OG0000105	PAS domain		-	OG0000868	Protein of unknown function (DUF424)	OG0001578	Elongator protein 3, MiaB family, Radical SAM		-
OG0000078	Sodium/hydrogen exchanger family	OG0000848	Domain of unknown function DUF83	OG0001177	PFAM TspO MBR family		-	OG0000869	Pfam:DUF137	OG0001623	Acetyltransferase (GNAT) domain		-
OG0000094	Ribonuclease R winged-helix domain	OG0000867	-	OG0001240	-		-	OG0000870	-	OG0001630	peptidase dimerisation domain		-
OG0000238	This enzyme is involved in nucleotide metabolism it produces dUMP, the immediate precursor of thymidine nucleotides and it decreases the intracellular concentration of dUTP so that uracil cannot be incorporated into DNA	OG0000871	biotin lipoate A B protein ligase	OG0001244	Uncharacterised conserved protein (DUF2156)		-	OG0000875	Specifically catalyzes the N1-methylation of pseudouridine at position 54 (Psi54) in tRNAs	OG0001633	Restriction endonuclease		-
OG0000344	Involved in regulation of DNA replication	OG0000908	nucleic acid binding OB-fold tRNA helicase-type	OG0001263	ABC-2 family transporter protein		-	OG0000891	regulator of amino acid metabolism, contains ACT domain	OG0001685	Glucose / Sorbosone dehydrogenase		-
OG0000796	TIGRFAM small GTP-binding protein	OG0000073	Belongs to the UDP-glucose GDP-mannose dehydrogenase family	OG0001280	PFAM Xylose isomerase domain protein TIM barrel		-	OG0000892	Belongs to the eukaryotic ribosomal protein eS31 family	OG0001717	PFAM Uncharacterised protein family UPF0150		-
OG0000816	TIGRFAM siroheme synthase	OG0000806	The beta subunit is responsible for the synthesis of L- tryptophan from indole and L-serine	OG0000882	Flavodoxin domain		-	OG0000894	Helix-turn-helix domain protein	OG0001741	Cytidylyltransferase		-
OG0000840	Belongs to the archaeal rpoM eukaryotic RPA12 RPB9 RPC11 RNA polymerase family	OG0000906	TIGRFAM F420-dependent oxidoreductase	OG0001258	-		-	OG0000912	PFAM Radical SAM domain protein	OG0001842	Aminotransferase class-III		-
OG0000841	tRNAHis guanylyltransferase	OG0000922	Catalyzes the oxidation of 5,10- methylenetetrahydrofolate to 5,10-methenyltetrahydrofolate and then the hydrolysis of 5,10-methenyltetrahydrofolate to 10- formyltetrahydrofolate	OG0001271	PDGLE domain		-	OG0000934	Pyruvate kinase, alpha/beta domain	OG0001887	Methyltransferase domain		-
OG0000070	Putative zinc- or iron-chelating domain	OG0000931	TIGRFAM phosphoribosylaminoimidazolecarboxamide formyltransferase IMP cyclohydrolase	OG0001188	Predicted membrane protein (DUF2207)		-	OG0000935	Family of unknown function (DUF5350)	OG0001890	Psort location CytoplasmicMembrane, score 10.00		-
OG0000125	COG1361 S-layer domain	OG0000710	Part of a complex that catalyzes the formation of methyl-coenzyme M and tetrahydromethanopterin from coenzyme M and methyl-tetrahydromethanopterin. This is an energy-conserving, sodium-ion translocating step	OG0001109	DNA polymerase elongation subunit (Family B)		-	OG0000965	Belongs to the eIF-2B alpha beta delta subunits family	OG0001920	Protein of unknown function (DUF3006)		-
OG0000233	PFAM CoA-binding domain protein	OG0000832	PFAM Methyl-coenzyme M reductase, beta subunit	OG0001151	SpoVT / AbrB like domain		-	OG0000966	-	OG0001924	PFAM SOUL heme-binding protein		-
OG0000295	Catalyzes the formation of S-adenosylmethionine from methionine and ATP	OG0000854	PFAM Methyl-coenzyme M reductase gamma subunit	OG0001375	ATP-NAD AcoX kinase		-	OG0000978	Proton pump that utilizes the energy of pyrophosphate hydrolysis as the driving force for proton movement across the membrane. Generates a proton motive force	OG0001927	C-5 cytosine-specific DNA methylase		-
OG0000793	Belongs to the UPF0284 family	OG0000132	PFAM Cation	OG0001260	Domain of unknown function (DUF4040)		-	OG0001005	NADH ubiquinone oxidoreductase 20 kDa subunit	OG0001940	Belongs to the UPF0310 family		-
OG0000870	-	OG0000423	PFAM cobalamin (vitamin B12) biosynthesis CbiG protein	OG0001398	Creatinase/Prolidase N-terminal domain		-	OG0001060	-	OG0001976	KTSC domain		-
OG0000891	regulator of amino acid metabolism, contains ACT domain	OG0000915	The alpha subunit is responsible for the aldol cleavage of indoleglycerol phosphate to indole and glyceraldehyde 3- phosphate	OG0001447	Catalyzes the phosphorylation of the hydroxyl group of 4-methyl-5-beta-hydroxyethylthiazole (THZ)		-	OG0001121	PFAM tRNA methyltransferase complex GCD14 subunit	OG0002000	-		-
OG0000892	Belongs to the eukaryotic ribosomal protein eS31 family	OG0000953	Domain in cystathionine beta-synthase and other proteins.	OG0001484	Thioredoxin		-	OG0001201	Probably plays a role in a hydrogenase nickel cofactor insertion step	OG0002007	-		-
OG0000894	Helix-turn-helix domain protein	OG0000956	PFAM Precorrin-8X methylmutase CbiC CobH	OG0001505	Condenses 4-methyl-5-(beta-hydroxyethyl)thiazole monophosphate (THZ-P) and 2-methyl-4-amino-5-hydroxymethyl pyrimidine pyrophosphate (HMP-PP) to form thiamine monophosphate (TMP)		-	OG0001277	TIGRFAM hydrogenase assembly chaperone hypC hupF	OG0002023	-		-
OG0000099	phosphate ABC transporter, inner membrane subunit PstA	OG0000873	Part of a complex that catalyzes the formation of methyl-coenzyme M and tetrahydromethanopterin from coenzyme M and methyl-tetrahydromethanopterin. This is an energy-conserving, sodium-ion translocating step	OG0001415	Large-conductance mechanosensitive channel, MscL		-	OG0001362	PFAM Methionine synthase, vitamin-B12 independent	OG0002043	-		-
OG0000213	Involved in cell shape control	OG0000937	Part of a complex that catalyzes the formation of methyl-coenzyme M and tetrahydromethanopterin from coenzyme M and methyl-tetrahydromethanopterin. This is an energy-conserving, sodium-ion translocating step	OG0001391	Calcineurin-like phosphoesterase superfamily domain		-	OG0001480	zinc finger, SWIM	OG0002055	-		-
OG0000276	PFAM CBS domain containing protein	OG0001000	Catalyzes the conversion of 3'-phosphate to a 2',3'- cyclic phosphodiester at the end of RNA. The mechanism of action of the enzyme occurs in 3 steps (A) adenylation of the enzyme by ATP	OG0001354	COG0733 Na -dependent transporters of the SNF family		-	OG0001494	Belongs to the archaeal adenylate kinase family	OG0002077	deoxyhypusine monooxygenase activity		-
OG0000339	Pyridine nucleotide-disulphide oxidoreductase	OG0000299	NUDIX domain	OG0001478	MscS Mechanosensitive ion channel		-	OG0000014	PFAM periplasmic binding protein	OG0002103	Polysaccharide biosynthesis protein		-
OG0000480	Catalyzes the first step in hexosamine metabolism, converting fructose-6P into glucosamine-6P using glutamine as a nitrogen source	OG0001053	Part of a complex that catalyzes the formation of methyl-coenzyme M and tetrahydromethanopterin from coenzyme M and methyl-tetrahydromethanopterin. This is an energy-conserving, sodium-ion translocating step	OG0001221	Phage plasmid primase, P4		-	OG0000021	Nucleotidyltransferase domain	OG0002147	OST-HTH/LOTUS domain		-
OG0000564	Helix-turn-helix XRE-family like proteins	OG0001066	MafB19-like deaminase	OG0001293	Outer membrane lipoprotein-sorting protein		-	OG0000025	-	OG0002156	-		-
OG0000772	SMART Elongator protein 3 MiaB NifB	OG0001069	Part of a complex that catalyzes the formation of methyl-coenzyme M and tetrahydromethanopterin from coenzyme M and methyl-tetrahydromethanopterin. This is an energy-conserving, sodium-ion translocating step	OG0001369	Protein of unknown function (DUF354)		-	OG0000027	PFAM ABC-2 type transporter	OG0002163	Bifunctional enzyme with both catalase and broad- spectrum peroxidase activity		-
OG0000850	Segregation and condensation protein ScpA	OG0001247	Segregation and condensation complex subunit ScpB	OG0001576	Methionine biosynthesis protein MetW		-	OG0000072	Coenzyme F420 hydrogenase dehydrogenase, beta subunit	OG0002169	Protein of unknown function (DUF998)		-
OG0000858	PFAM Radical SAM domain protein	OG0001265	Necessary for normal cell division and for the maintenance of normal septation	OG0001539	SMART zinc finger, CDGSH-type domain protein		-	OG0000095	formylmethanofuran dehydrogenase, subunit E	OG0002174	GYD domain		-
OG0000898	ZPR1-related zinc finger protein	OG0001288	Catalyzes the formation of archaetidylethanolamine (PtdEtn) from archaetidylserine (PtdSer)	OG0001662	Flavodoxin-like fold		-	OG0000096	PFAM regulatory protein, ArsR	OG0002194	4-alpha-glucanotransferase		-
OG0000900	TIGRFAM cytidyltransferase-related domain	OG0001408	Putative Fe-S cluster	OG0001723	Endonuclease/Exonuclease/phosphatase family		-	OG0000099	phosphate ABC transporter, inner membrane subunit PstA	OG0002215	-		-
OG0000923	protein conserved in archaea	OG0001409	RNA binding	OG0001735	Protein of unknown function (DUF1722)		-	OG0000126	PFAM oxidoreductase nitrogenase, component 1	OG0002227	Thiol disulfide interchange protein		-
OG0000924	subunit of tRNA(5-methylaminomethyl-2-thiouridylate) methyltransferase contains the PP-loop ATPase domain	OG0000183	DEAD DEAH box helicase domain protein	OG0001742	SAF		-	OG0000142	Nitrite sulfite reductase, hemoprotein beta-component, ferrodoxin domain protein	OG0002249	histidine kinase HAMP region domain protein		-
OG0000672	SigmaK-factor processing regulatory protein BofA	OG0000628	Produces ATP from ADP in the presence of a proton gradient across the membrane	OG0001615	V4R		-	OG0000164	Rubredoxin is a small nonheme, iron protein lacking acid-labile sulfide. Its single Fe, chelated to 4 Cys, functions as an electron acceptor and may also stabilize the conformation of the molecule	OG0002259	-		-
OG0000880	Sulfur transfer protein involved in thiamine biosynthesis	OG0000728	DNA-dependent RNA polymerase catalyzes the transcription of DNA into RNA using the four ribonucleoside triphosphates as substrates	OG0001840	-		-	OG0000213	Involved in cell shape control	OG0002291	-		-
OG0000398	membrane transporter protein	OG0000770	Protein of unknown function (DUF357)	OG0001567	DDE superfamily endonuclease		-	OG0000232	Flavin reductase like domain	OG0002329	-		-
OG0000427	Uncharacterized protein conserved in archaea (DUF2111)	OG0000813	H subunit	OG0001795	-		-	OG0000241	-	OG0002330	PFAM Pyridoxamine 5'-phosphate		-
OG0000674	Reduction of methyl-coenzyme M (2-(methylthio) ethanesulfonic acid) with 7-mercaptoheptanoylthreonine phosphate to methane and a heterodisulfide	OG0000820	RNase L inhibitor, RLI	OG0001849	-		-	OG0000242	Uncharacterised protein family UPF0047	OG0002332	Cupin domain		-
OG0000209	PFAM peptidase U32	OG0000825	Binds 16S rRNA, required for the assembly of 30S particles	OG0001904	Family of unknown function (DUF5328)		-	OG0000246	Pyridine nucleotide-disulphide oxidoreductase, dimerisation domain	OG0002392	Domain of unknown function (DUF1508)		-
OG0000940	PFAM elongation factor Tu domain 2	OG0000835	Class II Aldolase and Adducin N-terminal domain	OG0001979	Belongs to the UPF0282 family		-	OG0000257	PFAM binding-protein-dependent transport systems inner membrane component	OG0002394	HAD-superfamily hydrolase, subfamily IA, variant 1		-
OG0000963	Precorrin-6y C5,15-methyltransferase (Decarboxylating), CbiE subunit	OG0000605	PFAM ABC transporter	OG0001980	Rhodanese Homology Domain		-	OG0000261	Pyridoxamine 5'-phosphate oxidase	OG0002422	COG0739 Membrane proteins related to metalloendopeptidases		-
OG0000970	PFAM Uroporphyrin-III C tetrapyrrole (Corrin Porphyrin) methyltransferase	OG0000679	Protein of unknown function DUF89	OG0001655	Possibly the antitoxin component of a type II toxin- antitoxin (TA) system		-	OG0000271	Cysteine-rich small domain	OG0002444	-		-
OG0000938	Part of a complex that catalyzes the formation of methyl-coenzyme M and tetrahydromethanopterin from coenzyme M and methyl-tetrahydromethanopterin. This is an energy-conserving, sodium-ion translocating step	OG0000736	Fumarase C-terminus	OG0001783	Short C-terminal domain		-	OG0000276	PFAM CBS domain containing protein	OG0002504	-		-
OG0000519	PFAM SufBD protein	OG0000790	Fe-S type, tartrate fumarate subfamily, alpha	OG0001836	NADH-ubiquinone oxidoreductase-F iron-sulfur binding region		-	OG0000277	NifU-like N terminal domain	OG0002523	-		-
OG0000546	PFAM metallophosphoesterase	OG0000808	Belongs to the UPF0285 family	OG0001667	Homeodomain-like domain		-	OG0000284	Metallo-beta-lactamase superfamily	OG0002524	Exhibits S-adenosyl-L-methionine-dependent methyltransferase activity		-
OG0000650	-	OG0000066	Dimerisation domain of Zinc Transporter	OG0001958	Nitroreductase		-	OG0000287	Domain of unknown function (DUF1743)	OG0002530	Cytochrome C biogenesis protein transmembrane region		-
OG0000859	Transcription factor Pcc1	OG0000078	Sodium/hydrogen exchanger family	OG0002105	Thioredoxin-like [2Fe-2S] ferredoxin		-	OG0000302	Protein of unknown function (DUF4013)	OG0002552	Natural resistance-associated macrophage protein		-
OG0000740	Catalyzes the dephosphorylation of 2-phosphoglycolate	OG0000094	Ribonuclease R winged-helix domain	OG0002143	Glycosyl transferase family 4		-	OG0000303	Belongs to the LDH MDH superfamily	OG0002602	LamG domain protein jellyroll fold domain protein		-
OG0000853	Catalyzes the CTP-dependent phosphorylation of riboflavin (vitamin B2) to form flavin mononucleotide (FMN)	OG0000238	This enzyme is involved in nucleotide metabolism it produces dUMP, the immediate precursor of thymidine nucleotides and it decreases the intracellular concentration of dUTP so that uracil cannot be incorporated into DNA	OG0002032	Uncharacterised protein family (UPF0014)		-	OG0000339	Pyridine nucleotide-disulphide oxidoreductase	OG0002684	Alpha beta hydrolase		-
OG0000029	PFAM Glycosyl transferase family 2	OG0000344	Involved in regulation of DNA replication	OG0002141	Ribbon-helix-helix protein, copG family		-	OG0000360	PFAM Imidazoleglycerol-phosphate dehydratase	OG0002744	VIT family		-
OG0000080	ATPase, P-type (transporting), HAD superfamily, subfamily IC	OG0000796	TIGRFAM small GTP-binding protein	OG0001713	DNA integration		-	OG0000383	Bacterial transferase hexapeptide (six repeats)	OG0002784	Phosphate transport regulator		-
OG0000219	Binds and transfers iron-sulfur (Fe-S) clusters to target apoproteins. Can hydrolyze ATP	OG0000816	TIGRFAM siroheme synthase	OG0001825	FmdE, Molybdenum formylmethanofuran dehydrogenase operon		-	OG0000399	-	OG0002800	Protein of unknown function (DUF1648)		-
OG0000789	SMART regulatory protein, Crp	OG0000840	Belongs to the archaeal rpoM eukaryotic RPA12 RPB9 RPC11 RNA polymerase family	OG0002078	PFAM beta-lactamase domain protein		-	OG0000403	Belongs to the UPF0305 family	OG0002834	-		-
OG0000877	PFAM Ribosomal protein S27E	OG0000841	tRNAHis guanylyltransferase	OG0002178	-		-	OG0000426	PFAM NADP oxidoreductase coenzyme F420-dependent	OG0002906	-		-
OG0000893	Sjogren's syndrome/scleroderma autoantigen 1 (Autoantigen p27)	OG0000070	Putative zinc- or iron-chelating domain	OG0001566	-		-	OG0000454	Required for chromosome condensation and partitioning	OG0002931	Universal stress protein		-
OG0000896	binds to the 23S rRNA	OG0000125	COG1361 S-layer domain	OG0002270	Rubrerythrin		-	OG0000480	Catalyzes the first step in hexosamine metabolism, converting fructose-6P into glucosamine-6P using glutamine as a nitrogen source	OG0002932	-		-
OG0000897	PFAM methyltransferase small	OG0000233	PFAM CoA-binding domain protein	OG0002276	-		-	OG0000486	SMART Elongator protein 3 MiaB NifB	OG0002936	-		-
OG0000109	PFAM Aldehyde dehydrogenase	OG0000295	Catalyzes the formation of S-adenosylmethionine from methionine and ATP	OG0002285	-		-	OG0000488	chorismate mutase	OG0000776	Domain of unknown function (DUF4277)		-
OG0000172	Cysteine desulfurase	OG0000793	Belongs to the UPF0284 family	OG0002354	-		-	OG0000544	Belongs to the alpha-IPM synthase homocitrate synthase family	OG0001115	Belongs to the NifD NifK NifE NifN family		-
OG0000875	Specifically catalyzes the N1-methylation of pseudouridine at position 54 (Psi54) in tRNAs	OG0000870	-	OG0002360	-		-	OG0000545	peptidase M42 family protein	OG0001174	Rhomboid family		-
OG0000399	-	OG0000891	regulator of amino acid metabolism, contains ACT domain	OG0002378	-		-	OG0000564	Helix-turn-helix XRE-family like proteins	OG0001259	Metallo-beta-lactamase superfamily		-
OG0000926	Catalyzes the synthesis of GMP from XMP	OG0000892	Belongs to the eukaryotic ribosomal protein eS31 family	OG0001854	-		-	OG0000588	PFAM phosphate transporter	OG0001363	Protein of unknown function DUF72		-
OG0000927	Rio2, N-terminal	OG0000894	Helix-turn-helix domain protein	OG0002390	-		-	OG0000596	COG3634 Alkyl hydroperoxide reductase, large subunit	OG0001524	Protein of unknown function (DUF1538)		-
OG0000928	The beta subunit is responsible for the synthesis of L- tryptophan from indole and L-serine	OG0000099	phosphate ABC transporter, inner membrane subunit PstA	OG0002404	Cyclophilin-like		-	OG0000601	Belongs to the glyceraldehyde-3-phosphate dehydrogenase family	OG0001562	Belongs to the peptidase S16 family		-
OG0000932	Part of ribonuclease P, a protein complex that generates mature tRNA molecules by cleaving their 5'-ends	OG0000213	Involved in cell shape control	OG0002485	-		-	OG0000696	Protein-export membrane protein SecD	OG0001583	-		-
OG0000464	that it carries out the mismatch recognition step. This protein has a weak ATPase activity	OG0000276	PFAM CBS domain containing protein	OG0001098	-		-	OG0000697	Involved in protein export	OG0001584	FeoA		-
OG0000914	Tripartite tricarboxylate transporter TctA family	OG0000339	Pyridine nucleotide-disulphide oxidoreductase	OG0001483	CobW/HypB/UreG, nucleotide-binding domain		-	OG0000699	PFAM dihydropteroate synthase, DHPS	OG0001615	V4R		-
OG0000954	PFAM TfuA domain protein, core	OG0000480	Catalyzes the first step in hexosamine metabolism, converting fructose-6P into glucosamine-6P using glutamine as a nitrogen source	OG0001930	methyltransferase activity		-	OG0000700	Methanogenesis marker 13 metalloprotein	OG0001624	-		-
OG0000933	Catalyzes the methylation of C-1 in cobalt-precorrin-5B to form cobalt-precorrin-6A	OG0000564	Helix-turn-helix XRE-family like proteins	OG0002060	-		-	OG0000705	PFAM Like-Sm ribonucleoprotein, core	OG0001642	-		-
OG0000469	PFAM phosphatidate cytidylyltransferase	OG0000772	SMART Elongator protein 3 MiaB NifB	OG0002127	-		-	OG0000732	Sulfide dehydrogenase (Flavoprotein) subunit SudB	OG0001692	Predicted membrane protein (DUF2254)		-
OG0000365	Protein of unknown function DUF45	OG0000850	Segregation and condensation protein ScpA	OG0002280	Prokaryotic cytochrome b561		-	OG0000738	radical SAM domain protein	OG0001709	BadF/BadG/BcrA/BcrD ATPase family		-
OG0000967	Belongs to the arginase family	OG0000858	PFAM Radical SAM domain protein	OG0002374	heat shock protein binding		-	OG0000760	Belongs to the UPF0235 family	OG0001722	Radical SAM		-
OG0001017	ABC 3 transport family	OG0000898	ZPR1-related zinc finger protein	OG0002376	-		-	OG0000761	Acetolactate synthase, small subunit	OG0001757	Helicase		-
OG0001020	Belongs to the eukaryotic ribosomal protein eL40 family	OG0000900	TIGRFAM cytidyltransferase-related domain	OG0002391	pyrimidine nucleotide-sugar transmembrane transport		-	OG0000763	PFAM PUA domain containing protein	OG0001778	PFAM Adenosine specific kinase		-
OG0000161	Ferredoxin thioredoxin reductase catalytic beta chain	OG0000923	protein conserved in archaea	OG0002398	PFAM amino acid permease-associated region		-	OG0000772	SMART Elongator protein 3 MiaB NifB	OG0001785	Prevents misfolding and promotes the refolding and proper assembly of unfolded polypeptides generated under stress conditions		-
OG0000251	MarC family integral membrane protein	OG0000924	subunit of tRNA(5-methylaminomethyl-2-thiouridylate) methyltransferase contains the PP-loop ATPase domain	OG0002402	-		-	OG0000779	DNA polymerase beta domain protein region	OG0001814	KaiB		-
OG0000884	Essential subunit of the Sec protein translocation channel SecYEG. Clamps together the 2 halves of SecY. May contact the channel plug during translocation	OG0000672	SigmaK-factor processing regulatory protein BofA	OG0002406	radical SAM domain protein		-	OG0000817	6-pyruvoyl tetrahydropterin synthase	OG0001822	Shikimate kinase		-
OG0000206	DegT/DnrJ/EryC1/StrS aminotransferase family	OG0000880	Sulfur transfer protein involved in thiamine biosynthesis	OG0002457	-		-	OG0000818	aspartate glutamate uridylate kinase	OG0001840	-		-
OG0000771	IGPS catalyzes the conversion of PRFAR and glutamine to IGP, AICAR and glutamate. The HisH subunit provides the glutamine amidotransferase activity that produces the ammonia necessary to HisF for the synthesis of IGP and AICAR	OG0000398	membrane transporter protein	OG0002459	-		-	OG0000838	PFAM conserved	OG0001841	-		-
OG0000890	Protein of unknown function (DUF473)	OG0000427	Uncharacterized protein conserved in archaea (DUF2111)	OG0002483	sugar fermentation stimulation protein		-	OG0000845	acid binding OB-fold tRNA helicase-type	OG0001871	-		-
OG0000046	AMP-binding enzyme C-terminal domain	OG0000674	Reduction of methyl-coenzyme M (2-(methylthio) ethanesulfonic acid) with 7-mercaptoheptanoylthreonine phosphate to methane and a heterodisulfide	OG0002486	-		-	OG0000849	but it may be involved in stabilization of the trimeric complex	OG0001888	Calcineurin-like phosphoesterase		-
OG0000062	Belongs to the P(II) protein family	OG0000209	PFAM peptidase U32	OG0002490	cyclic 2,3-diphosphoglycerate synthetase activity		-	OG0000850	Segregation and condensation protein ScpA	OG0001894	Sulfatase		-
OG0000866	-	OG0000940	PFAM elongation factor Tu domain 2	OG0002496	domain protein		-	OG0000858	PFAM Radical SAM domain protein	OG0002073	Protein of unknown function (DUF3795)		-
OG0000935	Family of unknown function (DUF5350)	OG0000963	Precorrin-6y C5,15-methyltransferase (Decarboxylating), CbiE subunit	OG0002544	PFAM NurA domain		-	OG0000876	Belongs to the UPF0107 family	OG0002079	Transglutaminase-like superfamily		-
OG0000277	NifU-like N terminal domain	OG0000970	PFAM Uroporphyrin-III C tetrapyrrole (Corrin Porphyrin) methyltransferase	OG0002545	AAA-like domain		-	OG0000879	-	OG0002089	Bacterial regulatory protein, arsR family		-
OG0000895	PFAM formyl transferase domain protein	OG0000938	Part of a complex that catalyzes the formation of methyl-coenzyme M and tetrahydromethanopterin from coenzyme M and methyl-tetrahydromethanopterin. This is an energy-conserving, sodium-ion translocating step	OG0002565	-		-	OG0000898	ZPR1-related zinc finger protein	OG0002106	Polyketide cyclase / dehydrase and lipid transport		-
OG0000952	The UvrABC repair system catalyzes the recognition and processing of DNA lesions. UvrC both incises the 5' and 3' sides of the lesion. The N-terminal half is responsible for the 3' incision and the C-terminal half is responsible for the 5' incision	OG0000103	Subtilase family	OG0002569	-		-	OG0000900	TIGRFAM cytidyltransferase-related domain	OG0002112	-		-
OG0000210	Histone deacetylase domain	OG0001174	Rhomboid family	OG0002580	ATP citrate lyase citrate-binding		-	OG0000923	protein conserved in archaea	OG0002154	COG0380 Trehalose-6-phosphate synthase		-
OG0000807	-	OG0001227	Myo-inositol-1-phosphate synthase	OG0002585	Pfam:Nol1_Nop2_Fmu_2		-	OG0000924	subunit of tRNA(5-methylaminomethyl-2-thiouridylate) methyltransferase contains the PP-loop ATPase domain	OG0002167	-		-
OG0000962	PFAM CBS domain	OG0001269	Iron-sulphur cluster biosynthesis	OG0002591	-		-	OG0000926	Catalyzes the synthesis of GMP from XMP	OG0002173	Nitrogen regulatory protein P-II		-
OG0000945	Methyl-coenzyme M reductase operon protein D	OG0001291	metal ion binding	OG0002620	-		-	OG0000927	Rio2, N-terminal	OG0002187	Protein of unknown function (DUF3089)		-
OG0000020	PFAM Uncharacterised protein family UPF0150	OG0001343	Fumarylacetoacetate (FAA) hydrolase family	OG0001179	TIGRFAM hydrogenase accessory protein HypB		-	OG0000939	PFAM 4Fe-4S ferredoxin, iron-sulfur binding domain protein	OG0002241	PFAM amino acid permease-associated region		-
OG0000152	Polysaccharide biosynthesis protein	OG0001289	Type I phosphodiesterase / nucleotide pyrophosphatase	OG0001202	COG1668 ABC-type Na efflux pump, permease component		-	OG0000951	Catalyzes the addition of molecular CO(2) and H(2)O to ribulose 1,5-bisphosphate (RuBP), generating two molecules of 3- phosphoglycerate (3-PGA). Functions in an archaeal AMP degradation pathway, together with AMP phosphorylase and R15P isomerase	OG0002251	-		-
OG0000941	Putative exonuclease SbcCD, C subunit	OG0001344	NADH-ubiquinone/plastoquinone oxidoreductase chain 4L	OG0001087	-		-	OG0000955	Catalyzes a salvage reaction resulting in the formation of IMP that is energically less costly than de novo synthesis	OG0002258	LUD domain		-
OG0000872	PFAM metallophosphoesterase	OG0001385	-	OG0001133	AAA domain, putative AbiEii toxin, Type IV TA system		-	OG0000973	PFAM glutamine amidotransferase, class-II	OG0002275	family UPF0029		-
OG0000889	-	OG0000069	S-layer protein	OG0001321	Protein of unknown function (DUF1622)		-	OG0001016	Belongs to the HMG-CoA reductase family	OG0002292	DNA polymerase LigD, polymerase domain		-
OG0000184	PFAM Desulfoferrodoxin Dfx domain protein	OG0001338	-	OG0001376	uridine kinase		-	OG0001044	PFAM asparagine synthase	OG0002294	COG1226 Kef-type K transport systems		-
OG0000676	PFAM CBS domain	OG0001403	NADH-ubiquinone/plastoquinone oxidoreductase, chain 3	OG0000153	PFAM Cache, type 2 domain protein		-	OG0001095	PFAM peptidase	OG0002297	Catalyzes the two-step NADP-dependent conversion of GDP- 4-dehydro-6-deoxy-D-mannose to GDP-fucose, involving an epimerase and a reductase reaction		-
OG0000801	Protein of unknown function (DUF460)	OG0001442	PINc domain ribonuclease	OG0001351	COG0477 Permeases of the major facilitator superfamily		-	OG0001096	PFAM sigma-70 region 4 domain protein	OG0002302	Cobalt uptake substrate-specific transmembrane region		-
OG0000324	Belongs to the UPF0173 family	OG0001443	NADH-ubiquinone/plastoquinone oxidoreductase chain 6	OG0001487	NurA		-	OG0001214	COG0433 Predicted ATPase	OG0002434	Nucleotidyltransferase domain		-
OG0000163	Ammonium Transporter	OG0001444	NADH-ubiquinone/plastoquinone oxidoreductase chain 6	OG0001402	Nicotinic acid phosphoribosyltransferase		-	OG0001490	PFAM amine oxidase	OG0002467	-		-
OG0000274	Involved in regulation of DNA replication	OG0000519	PFAM SufBD protein	OG0001233	small GTP-binding protein		-	OG0000059	PFAM Cobyrinic acid a,c-diamide synthase	OG0002502	Protein of unknown function (DUF498/DUF598)		-
OG0000955	Catalyzes a salvage reaction resulting in the formation of IMP that is energically less costly than de novo synthesis	OG0000546	PFAM metallophosphoesterase	OG0001330	PFAM Isochorismatase		-	OG0000061	FecCD transport family	OG0002515	DnaJ molecular chaperone homology domain		-
OG0000982	PFAM CutA1 divalent ion tolerance protein	OG0000650	-	OG0001348	Phosphoribosyl transferase domain		-	OG0000093	hydrophobe amphiphile efflux-3 (HAE3) family	OG0002529	Belongs to the glycosyl hydrolase 57 family		-
OG0000602	Cyclophilin type peptidyl-prolyl cis-trans isomerase/CLD	OG0000859	Transcription factor Pcc1	OG0001243	-		-	OG0000128	Rhodanese-like domain	OG0002556	-		-
OG0000258	Predicted permease	OG0000740	Catalyzes the dephosphorylation of 2-phosphoglycolate	OG0001329	Sulfate permease family		-	OG0000175	PFAM Thiamine pyrophosphate	OG0002603	PFAM Hemerythrin HHE cation binding domain protein		-
OG0000918	Transglutaminase-like superfamily	OG0000853	Catalyzes the CTP-dependent phosphorylation of riboflavin (vitamin B2) to form flavin mononucleotide (FMN)	OG0001337	O-methyltransferase		-	OG0000217	Molybdopterin converting factor, small subunit	OG0002607	PFAM ThiJ PfpI domain protein		-
OG0000110	Belongs to the DegT DnrJ EryC1 family	OG0000029	PFAM Glycosyl transferase family 2	OG0001309	HEPN domain		-	OG0000227	Transcriptional	OG0002625	Phage-associated protein		-
OG0000138	transferase hexapeptide repeat	OG0000080	ATPase, P-type (transporting), HAD superfamily, subfamily IC	OG0001689	-		-	OG0000292	Elongator protein 3 MiaB NifB	OG0002682	COG1520 FOG WD40-like repeat		-
OG0000886	Belongs to the metallo-dependent hydrolases superfamily. Adenine deaminase family	OG0000219	Binds and transfers iron-sulfur (Fe-S) clusters to target apoproteins. Can hydrolyze ATP	OG0001231	ABC-type branched-chain amino acid transport systems ATPase component		-	OG0000370	Plays a role in the regulation of phosphate uptake	OG0002743	-		-
OG0001041	Bifunctional nuclease	OG0000789	SMART regulatory protein, Crp	OG0001857	COG0559 Branched-chain amino acid ABC-type transport system, permease components		-	OG0000402	PFAM DEAD_2 domain protein	OG0002746	oligoendopeptidase F		-
OG0000903	Belongs to the UPF0280 family	OG0000877	PFAM Ribosomal protein S27E	OG0001284	LVIVD repeat-containing protein		-	OG0000409	PFAM 4Fe-4S ferredoxin, iron-sulfur binding domain protein	OG0002754	PFAM Osmosensitive K channel His kinase sensor		-
OG0000947	PFAM 4Fe-4S ferredoxin, iron-sulfur binding domain protein	OG0000893	Sjogren's syndrome/scleroderma autoantigen 1 (Autoantigen p27)	OG0001842	Aminotransferase class-III		-	OG0000428	Belongs to the TrpF family	OG0002776	Bacterial protein of unknown function (DUF853)		-
OG0000137	Uncharacterised protein family UPF0066	OG0000896	binds to the 23S rRNA	OG0001744	Possible catecholamine-binding domain present in a variety of eukaryotic proteins.		-	OG0000593	PFAM PUA domain containing protein	OG0002779	Glutamine synthetase, catalytic domain		-
OG0000267	Belongs to the glutamate synthase family	OG0000897	PFAM methyltransferase small	OG0002034	PFAM Glycosyl transferase family 2		-	OG0000672	SigmaK-factor processing regulatory protein BofA	OG0002785	-		-
OG0000021	Nucleotidyltransferase domain	OG0000109	PFAM Aldehyde dehydrogenase	OG0002035	Creatinine amidohydrolase		-	OG0000758	Catalyzes the deamination of 5-methylthioadenosine and S-adenosyl-L-homocysteine into 5-methylthioinosine and S-inosyl-L- homocysteine, respectively. Is also able to deaminate adenosine	OG0002786	DNA mediated transformation		-
OG0000383	Bacterial transferase hexapeptide (six repeats)	OG0000172	Cysteine desulfurase	OG0002090	Fumarase C C-terminus		-	OG0000788	Carbamoyl-phosphate synthetase large chain domain protein	OG0002792	-		-
OG0000175	PFAM Thiamine pyrophosphate	OG0000875	Specifically catalyzes the N1-methylation of pseudouridine at position 54 (Psi54) in tRNAs	OG0001838	-		-	OG0000827	TIGRFAM oxaloacetate decarboxylase alpha subunit	OG0002803	GYD domain		-
OG0000957	PFAM Exonuclease VII large subunit	OG0000399	-	OG0001536	Part of the twin-arginine translocation (Tat) system that transports large folded proteins containing a characteristic twin-arginine motif in their signal peptide across membranes. TatA could form the protein-conducting channel of the Tat system		-	OG0000829	PHP C-terminal domain protein	OG0002890	-		-
OG0000297	PFAM ADP-ribosylation Crystallin J1	OG0000926	Catalyzes the synthesis of GMP from XMP	OG0002094	Glycosyltransferase 28 domain		-	OG0000848	Domain of unknown function DUF83	OG0002897	-		-
OG0001002	-	OG0000927	Rio2, N-terminal	OG0001210	PFAM Collagen-binding surface protein Cna-like, B-type domain		-	OG0000865	Catalyzes the condensation of pyruvate and acetyl- coenzyme A to form (R)-citramalate	OG0002908	-		-
OG0000282	PFAM oxidoreductase domain protein	OG0000928	The beta subunit is responsible for the synthesis of L- tryptophan from indole and L-serine	OG0002228	Transmembrane exosortase (Exosortase_EpsH)		-	OG0000867	-	OG0002934	Belongs to the peptidase S16 family		-
OG0000335	Cytochrome C biogenesis protein transmembrane region	OG0000932	Part of ribonuclease P, a protein complex that generates mature tRNA molecules by cleaving their 5'-ends	OG0002296	Catalyzes the cyclization of 5-formylamidoimidazole-4- carboxamide ribonucleotide to IMP		-	OG0000871	biotin lipoate A B protein ligase	OG0002992	L-lactate permease		-
OG0000855	PFAM Lysine exporter protein (LYSE YGGA)	OG0000464	that it carries out the mismatch recognition step. This protein has a weak ATPase activity	OG0002301	-		-	OG0000880	Sulfur transfer protein involved in thiamine biosynthesis	OG0003006	-		-
OG0000196	Catalyzes the gamma-elimination of phosphate from L- phosphohomoserine and the beta-addition of water to produce L- threonine	OG0000914	Tripartite tricarboxylate transporter TctA family	OG0001425	PFAM Acetyl-CoA hydrolase transferase		-	OG0000883	Flavodoxin	OG0003052	-		-
OG0000003	PFAM PKD domain containing protein	OG0000954	PFAM TfuA domain protein, core	OG0002004	von willebrand factor, type A		-	OG0000895	PFAM formyl transferase domain protein	OG0003064	Protein of unknown function (DUF1697)		-
OG0000942	-	OG0000933	Catalyzes the methylation of C-1 in cobalt-precorrin-5B to form cobalt-precorrin-6A	OG0002038	Belongs to the carbohydrate kinase PfkB family. LacC subfamily		-	OG0000905	Uncharacterized protein conserved in archaea (DUF2073)	OG0003105	-		-
OG0000262	TIGRFAM intracellular protease, PfpI family	OG0000469	PFAM phosphatidate cytidylyltransferase	OG0002045	-		-	OG0000908	nucleic acid binding OB-fold tRNA helicase-type	OG0003106	-		-
OG0000966	-	OG0000365	Protein of unknown function DUF45	OG0002381	Part of the twin-arginine translocation (Tat) system that transports large folded proteins containing a characteristic twin-arginine motif in their signal peptide across membranes		-	OG0000909	SMART Elongator protein 3 MiaB NifB	OG0003108	resolvase		-
OG0000014	PFAM periplasmic binding protein	OG0000967	Belongs to the arginase family	OG0002387	Part of the twin-arginine translocation (Tat) system that transports large folded proteins containing a characteristic twin-arginine motif in their signal peptide across membranes		-	OG0000928	The beta subunit is responsible for the synthesis of L- tryptophan from indole and L-serine	OG0003109	PFAM Abortive infection protein		-
OG0000246	Pyridine nucleotide-disulphide oxidoreductase, dimerisation domain	OG0001017	ABC 3 transport family	OG0001205	Putative ATPase subunit of terminase (gpP-like)		-	OG0000932	Part of ribonuclease P, a protein complex that generates mature tRNA molecules by cleaving their 5'-ends	OG0003116	PFAM Major Facilitator Superfamily		-
OG0000284	Metallo-beta-lactamase superfamily	OG0001020	Belongs to the eukaryotic ribosomal protein eL40 family	OG0001314	DNA-binding transcription factor activity		-	OG0000943	TIGRFAM glutamate synthase (NADPH), homotetrameric	OG0000341	Hydantoinase/oxoprolinase N-terminal region		-
OG0000732	Sulfide dehydrogenase (Flavoprotein) subunit SudB	OG0000037	HsdM N-terminal domain	OG0001715	COG0604 NADPH quinone reductase and related Zn-dependent oxidoreductases		-	OG0000952	The UvrABC repair system catalyzes the recognition and processing of DNA lesions. UvrC both incises the 5' and 3' sides of the lesion. The N-terminal half is responsible for the 3' incision and the C-terminal half is responsible for the 5' incision	OG0000888	Lrp/AsnC ligand binding domain		-
OG0000061	FecCD transport family	OG0000170	Aldehyde ferredoxin oxidoreductase, N-terminal domain	OG0001899	PFAM Biotin lipoate A B protein ligase family		-	OG0000969	Peptidase A24A, prepilin type IV	OG0000995	Reverse transcriptase (RNA-dependent DNA polymerase)		-
OG0000943	TIGRFAM glutamate synthase (NADPH), homotetrameric	OG0001298	-	OG0001928	-		-	OG0000981	peptidase dimerisation domain	OG0001073	COG0553 Superfamily II DNA RNA helicases, SNF2 family		-
OG0000986	PFAM amino acid-binding ACT domain protein	OG0001322	Part of a complex that catalyzes the reversible reduction of CoM-S-S-CoB to the thiol-coenzymes H-S-CoM (coenzyme M) and H-S-CoB (coenzyme B). HdrE may be responsible for anchoring the complex to the membrane	OG0002010	-		-	OG0000982	PFAM CutA1 divalent ion tolerance protein	OG0001101	Transposase DDE domain		-
OG0000925	Nucleoside 2-deoxyribosyltransferase like	OG0001358	-	OG0002082	-		-	OG0000986	PFAM amino acid-binding ACT domain protein	OG0001169	Virulence protein RhuM family		-
OG0000950	SMART Elongator protein 3 MiaB NifB	OG0001355	Mo-molybdopterin cofactor metabolic process	OG0002230	Protein of unknown function (DUF763)		-	OG0000992	PFAM conserved	OG0001209	-		-
OG0000991	PFAM Exonuclease VII small subunit	OG0001191	Stage II sporulation protein M	OG0002284	-		-	OG0001013	-	OG0001215	shikimate kinase activity		-
OG0000098	PFAM Dinitrogenase iron-molybdenum cofactor biosynthesis	OG0001296	Calcineurin-like phosphoesterase superfamily domain	OG0002339	PFAM plasmid stabilization system		-	OG0001018	DNA-dependent RNA polymerase catalyzes the transcription of DNA into RNA using the four ribonucleoside triphosphates as substrates	OG0001237	EamA-like transporter family		-
OG0001009	Part of the energy-coupling factor (ECF) transporter complex CbiMNOQ involved in cobalt import	OG0000100	Protein of unknown function (DUF1699)	OG0002388	4-amino-4-deoxy-alpha-L-arabinopyranosyl undecaprenyl phosphate biosynthetic process		-	OG0001037	transcriptional regulators containing the CopG Arc MetJ DNA-binding domain	OG0001290	Radical SAM superfamily		-
OG0000112	Cytotoxic translational repressor of toxin-antitoxin stability system	OG0001142	-	OG0002489	Uncharacterized protein, homolog of nitrogen regulatory protein PII		-	OG0001038	PFAM TatD-related deoxyribonuclease	OG0001311	PFAM Uncharacterised protein family UPF0150		-
OG0001057	-	OG0001407	RNA ligase	OG0001335	Domain of unknown function (DUF4157)		-	OG0001070	-	OG0001339	Important for reducing fluoride concentration in the cell, thus reducing its toxicity		-
OG0000353	Catalyzes the condensation of 2 ATP molecules into cyclic di-AMP (c-di-AMP), a	OG0000161	Ferredoxin thioredoxin reductase catalytic beta chain	OG0002149	-		-	OG0001077	PFAM BioY protein	OG0001471	Appr-1'-p processing enzyme		-
OG0000907	Catalyzes the stereoinversion of LL-2,6- diaminoheptanedioate (L,L-DAP) to meso-diaminoheptanedioate (meso- DAP), a precursor of L-lysine	OG0000251	MarC family integral membrane protein	OG0002261	-		-	OG0001081	PFAM peptidase zinc-dependent	OG0001507	Domain of unknown function (DUF4870)		-
OG0000444	phosphoesterase RecJ domain protein	OG0000884	Essential subunit of the Sec protein translocation channel SecYEG. Clamps together the 2 halves of SecY. May contact the channel plug during translocation	OG0002316	Cytochrome C biogenesis protein transmembrane region		-	OG0001200	PFAM carbonic anhydrase	OG0001528	Uncharacterized ACR, COG1430		-
OG0000687	PFAM pyruvate ferredoxin flavodoxin oxidoreductase	OG0000206	DegT/DnrJ/EryC1/StrS aminotransferase family	OG0002322	-		-	OG0001331	-	OG0001565	protein carbamoylation		-
OG0000121	Thiol-specific peroxidase that catalyzes the reduction of hydrogen peroxide and organic hydroperoxides to water and alcohols, respectively. Plays a role in cell protection against oxidative stress by detoxifying peroxides	OG0000771	IGPS catalyzes the conversion of PRFAR and glutamine to IGP, AICAR and glutamate. The HisH subunit provides the glutamine amidotransferase activity that produces the ammonia necessary to HisF for the synthesis of IGP and AICAR	OG0002499	Putative zinc- or iron-chelating domain		-	OG0001544	Catalyzes the conversion of inosine 5'-phosphate (IMP) to xanthosine 5'-phosphate (XMP), the first committed and rate- limiting step in the de novo synthesis of guanine nucleotides, and therefore plays an important role in the regulation of cell growth	OG0001567	DDE superfamily endonuclease		-
OG0000965	Belongs to the eIF-2B alpha beta delta subunits family	OG0000890	Protein of unknown function (DUF473)	OG0001007	-		-	OG0000023	TIGRFAM archaeal flagellin N-terminal-like domain	OG0001601	Cleaves both 3' and 5' ssDNA extremities of branched DNA structures		-
OG0000939	PFAM 4Fe-4S ferredoxin, iron-sulfur binding domain protein	OG0000046	AMP-binding enzyme C-terminal domain	OG0001085	Multicopper		-	OG0000049	extracellular matrix structural constituent	OG0001644	DsrE/DsrF-like family		-
OG0000973	PFAM glutamine amidotransferase, class-II	OG0000062	Belongs to the P(II) protein family	OG0001086	Domain of unknown function DUF11		-	OG0000051	4Fe-4S dicluster domain	OG0001679	Acetyltransferase (GNAT) domain		-
OG0001013	-	OG0000866	-	OG0001097	-		-	OG0000060	response regulator, receiver	OG0001693	Small Multidrug Resistance protein		-
OG0001018	DNA-dependent RNA polymerase catalyzes the transcription of DNA into RNA using the four ribonucleoside triphosphates as substrates	OG0000935	Family of unknown function (DUF5350)	OG0001138	Rhodanese Homology Domain		-	OG0000073	Belongs to the UDP-glucose GDP-mannose dehydrogenase family	OG0001710	Uncharacterised protein family (UPF0182)		-
OG0000235	PFAM PUA domain	OG0000277	NifU-like N terminal domain	OG0001323	-		-	OG0000105	PAS domain	OG0001738	Uncharacterised nucleotidyltransferase		-
OG0000997	Catalyzes the conversion of AMP and phosphate to adenine and ribose 1,5-bisphosphate (R15P). Exhibits phosphorylase activity toward CMP and UMP in addition to AMP. Functions in an archaeal AMP degradation pathway, together with R15P isomerase and RubisCO	OG0000895	PFAM formyl transferase domain protein	OG0001356	Belongs to the GSP D family		-	OG0000178	Chagasin family peptidase inhibitor I42	OG0001744	Possible catecholamine-binding domain present in a variety of eukaryotic proteins.		-
OG0001014	Uncharacterized protein conserved in archaea (DUF2124)	OG0000952	The UvrABC repair system catalyzes the recognition and processing of DNA lesions. UvrC both incises the 5' and 3' sides of the lesion. The N-terminal half is responsible for the 3' incision and the C-terminal half is responsible for the 5' incision	OG0001374	-		-	OG0000186	PBP superfamily domain	OG0001763	Leucine carboxyl methyltransferase		-
OG0000372	-	OG0000210	Histone deacetylase domain	OG0001423	oxidoreductase activity		-	OG0000210	Histone deacetylase domain	OG0001765	Putative ATP-dependent Lon protease		-
		OG0000807	-	OG0001513	-		-	OG0000235	PFAM PUA domain	OG0001782	-		-
		OG0000962	PFAM CBS domain	OG0001610	-		-	OG0000313	PFAM AMP-dependent synthetase and ligase	OG0001795	-		-
		OG0000945	Methyl-coenzyme M reductase operon protein D	OG0001745	-		-	OG0000398	membrane transporter protein	OG0001806	Belongs to the class-I aminoacyl-tRNA synthetase family		-
		OG0000020	PFAM Uncharacterised protein family UPF0150	OG0001768	Uncharacterised protein family (UPF0175)		-	OG0000427	Uncharacterized protein conserved in archaea (DUF2111)	OG0001810	more specifically in 18S rRNA pseudouridylation and in cleavage of pre-rRNA		-
		OG0000152	Polysaccharide biosynthesis protein	OG0001823	polysaccharide biosynthetic process		-	OG0000464	that it carries out the mismatch recognition step. This protein has a weak ATPase activity	OG0001834	PFAM Stigma-specific protein, Stig1		-
		OG0000941	Putative exonuclease SbcCD, C subunit	OG0001933	domain protein		-	OG0000481	Protein of unknown function (DUF541)	OG0001849	-		-
		OG0001043	Zinc-uptake complex component A periplasmic	OG0002148	-		-	OG0000553	Exchanges the guanine residue with 7-cyano-7- deazaguanine (preQ0) at position 15 in the dihydrouridine loop (D- loop) of archaeal tRNAs	OG0001864	Protein of unknown function (DUF2795)		-
		OG0001049	Specifically catalyzes the beta-elimination of phosphate from L-phosphoserine and the beta-addition of sulfite to the dehydroalanine intermediate to produce L-cysteate	OG0002177	-		-	OG0000602	Cyclophilin type peptidyl-prolyl cis-trans isomerase/CLD	OG0001904	Family of unknown function (DUF5328)		-
		OG0000851	Does not function as a glutathione-disulfide oxidoreductase in the presence of glutathione and glutathione reductase. Has low thioredoxin activity in vitro	OG0002236	Domain of unknown function DUF11		-	OG0000665	Belongs to the alpha-IPM synthase homocitrate synthase family	OG0001931	Uncharacterized protein conserved in archaea (DUF2121)		-
		OG0000844	PFAM nucleoside recognition domain protein	OG0002268	Domain of unknown function (DUF4198)		-	OG0000674	Reduction of methyl-coenzyme M (2-(methylthio) ethanesulfonic acid) with 7-mercaptoheptanoylthreonine phosphate to methane and a heterodisulfide	OG0001935	Binds to Cpn60 in the presence of Mg-ATP and suppresses the ATPase activity of the latter		-
		OG0001226	haloacid dehalogenase-like hydrolase	OG0002310	-		-	OG0000762	DEAD DEAH box helicase domain protein	OG0001953	Domain of unknown function (DUF4258)		-
		OG0000671	TRAM domain	OG0002317	-		-	OG0000806	The beta subunit is responsible for the synthesis of L- tryptophan from indole and L-serine	OG0001979	Belongs to the UPF0282 family		-
		OG0001145	Pyridine nucleotide-disulphide oxidoreductase, dimerisation domain	OG0002320	-		-	OG0000807	-	OG0001980	Rhodanese Homology Domain		-
		OG0001270	FAD linked oxidases, C-terminal domain	OG0002396	-		-	OG0000831	PFAM isocitrate isopropylmalate dehydrogenase	OG0001993	Alpha amylase, catalytic domain		-
		OG0001326	-	OG0002407	Domain of unknown function (DUF4139)		-	OG0000846	Helix-turn-helix domain	OG0002026	TIGRFAM drug resistance transporter, Bcr CflA subfamily		-
		OG0001360	-	OG0002408	Collagen triple helix repeat (20 copies)		-	OG0000864	PFAM AMMECR1 domain protein	OG0002029	Subtilase family		-
		OG0001405	Lycopene cyclase protein	OG0002429	-		-	OG0000878	PFAM methyl-viologen-reducing hydrogenase delta subunit	OG0002034	PFAM Glycosyl transferase family 2		-
		OG0001440	AAA domain (Cdc48 subfamily)	OG0002437	domain, Protein		-	OG0000899	PFAM Pre-mRNA processing ribonucleoprotein, binding	OG0002035	Creatinine amidohydrolase		-
		OG0001446	-	OG0002454	metallophosphoesterase		-	OG0000906	TIGRFAM F420-dependent oxidoreductase	OG0002051	COG2133 Glucose sorbosone dehydrogenases		-
		OG0001458	Protein of unknown function (DUF434)	OG0002455	Cytochrome c-type biogenesis protein CcmF C-terminal		-	OG0000914	Tripartite tricarboxylate transporter TctA family	OG0002090	Fumarase C C-terminus		-
		OG0000618	Domain of unknown function DUF11	OG0002492	-		-	OG0000922	Catalyzes the oxidation of 5,10- methylenetetrahydrofolate to 5,10-methenyltetrahydrofolate and then the hydrolysis of 5,10-methenyltetrahydrofolate to 10- formyltetrahydrofolate	OG0002162	Acyltransferase family		-
		OG0001502	-	OG0002493	exo-alpha-(2->6)-sialidase activity		-	OG0000925	Nucleoside 2-deoxyribosyltransferase like	OG0002166	AAA domain		-
		OG0000872	PFAM metallophosphoesterase	OG0002516	-		-	OG0000931	TIGRFAM phosphoribosylaminoimidazolecarboxamide formyltransferase IMP cyclohydrolase	OG0002170	ATP-grasp domain		-
		OG0000889	-	OG0002546	-		-	OG0000948	Glutaredoxin	OG0002182	-		-
		OG0000184	PFAM Desulfoferrodoxin Dfx domain protein	OG0002564	Pyridoxal 5'-phosphate (PLP)-binding protein, which is involved in PLP homeostasis		-	OG0000949	Uncharacterized membrane protein (DUF2298)	OG0002193	Subunit R is required for both nuclease and ATPase activities, but not for modification		-
		OG0000676	PFAM CBS domain	OG0002579	-		-	OG0000950	SMART Elongator protein 3 MiaB NifB	OG0002234	PFAM glutamate--cysteine ligase, GCS2		-
		OG0000801	Protein of unknown function (DUF460)	OG0002581	-		-	OG0000957	PFAM Exonuclease VII large subunit	OG0002246	2-hydroxyglutaryl-CoA dehydratase, D-component		-
		OG0000324	Belongs to the UPF0173 family	OG0002584	-		-	OG0000959	PFAM PEGA domain	OG0002278	Nucleotidyl transferase		-
		OG0000163	Ammonium Transporter	OG0002586	-		-	OG0000962	PFAM CBS domain	OG0002295	Bacterio-opsin activator HTH		-
		OG0000274	Involved in regulation of DNA replication	OG0002614	-		-	OG0000972	Rubrerythrin	OG0002308	-		-
		OG0000955	Catalyzes a salvage reaction resulting in the formation of IMP that is energically less costly than de novo synthesis	OG0002650	Catalyzes the conversion of epoxyqueuosine (oQ) to queuosine (Q), which is a hypermodified base found in the wobble positions of tRNA(Asp), tRNA(Asn), tRNA(His) and tRNA(Tyr)		-	OG0000975	Succinate dehydrogenase fumarate reductase flavoprotein subunit	OG0002315	PFAM Polysaccharide pyruvyl transferase		-
		OG0000982	PFAM CutA1 divalent ion tolerance protein	OG0002660	-		-	OG0000991	PFAM Exonuclease VII small subunit	OG0002333	-		-
		OG0000602	Cyclophilin type peptidyl-prolyl cis-trans isomerase/CLD	OG0002661	cytochrome complex assembly		-	OG0001050	-	OG0002336	PRC-barrel domain		-
		OG0000258	Predicted permease	OG0002663	transferase activity, transferring acyl groups		-	OG0001080	Domain of unknown function DUF123	OG0002337	ChaB		-
		OG0000918	Transglutaminase-like superfamily	OG0002664	-		-	OG0001082	Uncharacterized protein containing a ferredoxin domain (DUF2148)	OG0002415	-		-
		OG0000110	Belongs to the DegT DnrJ EryC1 family	OG0002671	response to oxidative stress		-	OG0001146	archaeosine synthase activity	OG0002425	NOG31153 non supervised orthologous group		-
		OG0000138	transferase hexapeptide repeat	OG0002674	-		-	OG0001166	PFAM amine oxidase	OG0002436	-		-
		OG0000886	Belongs to the metallo-dependent hydrolases superfamily. Adenine deaminase family	OG0002692	VanZ like family		-	OG0001251	phosphoribosyl-ATP pyrophosphohydrolase	OG0002458	Exonuclease		-
		OG0001041	Bifunctional nuclease	OG0002693	-		-	OG0001252	Mut7-C RNAse domain	OG0002464	bis(5'-adenosyl)-triphosphatase activity		-
		OG0000833	-	OG0002703	COG1522 Transcriptional regulators		-	OG0001417	methanogenesis marker protein 11	OG0002466	-		-
		OG0000437	Protein of unknown function (DUF1614)	OG0002705	-		-	OG0001448	-	OG0002471	alpha/beta hydrolase fold		-
		OG0000406	Thiamine pyrophosphate enzyme, N-terminal TPP binding domain	OG0002707	-		-	OG0001496	-	OG0002526	Acyltransferase family		-
		OG0000996	Domain of unknown function (DUF296)	OG0002708	oxidoreductase activity		-	OG0001515	5-formyltetrahydrofolate cycloligase	OG0002557	Protein of unknown function (DUF3887)		-
		OG0001056	-	OG0002709	-		-	OG0001560	-	OG0002558	-		-
		OG0001170	-	OG0002712	-		-	OG0001588	-	OG0002568	Peptidase family M28		-
		OG0001156	Putative pyruvate format-lyase activating enzyme (DUF1786)	OG0002713	-		-	OG0001590	-	OG0002596	Nitroreductase family		-
		OG0001155	Putative small multi-drug export protein	OG0002714	domain, Protein		-	OG0000033	Domain of unknown function (DUF3821)	OG0002610	Carotene biosynthesis associated membrane protein		-
		OG0001341	Metallo-beta-lactamase superfamily	OG0002715	-		-	OG0000041	TIGRFAM ATPase, P-type (transporting), HAD superfamily, subfamily IC	OG0002626	-		-
		OG0001357	-	OG0002717	-		-	OG0000144	Part of a complex that catalyzes the formation of methyl-coenzyme M and tetrahydromethanopterin from coenzyme M and methyl-tetrahydromethanopterin. This is an energy-conserving, sodium-ion translocating step	OG0002647	-		-
		OG0001359	NYN domain	OG0002718	-		-	OG0000147	PFAM 4Fe-4S ferredoxin, iron-sulfur binding domain protein	OG0002742	-		-
		OG0001412	Has ATPase and non-specific DNA-binding activities	OG0002719	cell wall organization		-	OG0000185	Belongs to the sodium solute symporter (SSF) (TC 2.A.21) family	OG0002748	Winged helix DNA-binding domain		-
		OG0001469	eRF1 domain 2	OG0002720	-		-	OG0000209	PFAM peptidase U32	OG0002751	Alpha beta hydrolase		-
		OG0001501	F420H2 dehydrogenase subunit FpoO	OG0002725	-		-	OG0000258	Predicted permease	OG0002753	redox protein regulator of disulfide bond formation		-
		OG0001511	-	OG0002726	Isocitrate/isopropylmalate dehydrogenase		-	OG0000297	PFAM ADP-ribosylation Crystallin J1	OG0002758	-		-
		OG0000903	Belongs to the UPF0280 family	OG0002729	Specifically methylates the adenine in position 2030 of 23S rRNA		-	OG0000380	Catalyzes the transfer of the phosphoribosyl group of 5- phosphorylribose-1-pyrophosphate (PRPP) to anthranilate to yield N-(5'-phosphoribosyl)-anthranilate (PRA)	OG0002763	hydrolase activity, acting on ester bonds		-
		OG0000947	PFAM 4Fe-4S ferredoxin, iron-sulfur binding domain protein	OG0002730	-		-	OG0000710	Part of a complex that catalyzes the formation of methyl-coenzyme M and tetrahydromethanopterin from coenzyme M and methyl-tetrahydromethanopterin. This is an energy-conserving, sodium-ion translocating step	OG0002765	-		-
		OG0000137	Uncharacterised protein family UPF0066	OG0002731	Protein of unknown function (DUF1638)		-	OG0000805	TIR domain	OG0002832	Domain of unknown function (DU1801)		-
		OG0000267	Belongs to the glutamate synthase family	OG0002732	-		-	OG0000832	PFAM Methyl-coenzyme M reductase, beta subunit	OG0002838	EamA-like transporter family		-
		OG0000021	Nucleotidyltransferase domain	OG0002733	-		-	OG0000854	PFAM Methyl-coenzyme M reductase gamma subunit	OG0002894	Protein phosphatase 2C		-
		OG0000383	Bacterial transferase hexapeptide (six repeats)	OG0002734	-		-	OG0000874	component I	OG0002909	PFAM Radical SAM domain protein		-
		OG0000175	PFAM Thiamine pyrophosphate	OG0002735	-		-	OG0000901	Catalyzes the methylation of C-15 in cobalt-precorrin-6B followed by the decarboxylation of C-12 to form cobalt-precorrin- 7	OG0002910	FAD dependent oxidoreductase		-
		OG0000957	PFAM Exonuclease VII large subunit	OG0002736	-		-	OG0000904	Belongs to the UPF0215 family	OG0002911	PFAM GCN5-related N-acetyltransferase		-
		OG0000297	PFAM ADP-ribosylation Crystallin J1	OG0002737	-		-	OG0000913	PFAM Uncharacterised protein family (UPF0153)	OG0002927	Peptidase family C69		-
		OG0001002	-	OG0002738	-		-	OG0000916	PFAM Indole-3-glycerol phosphate synthase	OG0002937	-		-
		OG0000282	PFAM oxidoreductase domain protein	OG0002739	-		-	OG0000918	Transglutaminase-like superfamily	OG0002938	Putative zinc ribbon domain		-
		OG0000335	Cytochrome C biogenesis protein transmembrane region	OG0002740	-		-	OG0000919	PFAM beta-lactamase domain protein	OG0002957	IrrE N-terminal-like domain		-
		OG0000855	PFAM Lysine exporter protein (LYSE YGGA)	OG0002767	Aconitase C-terminal domain		-	OG0000940	PFAM elongation factor Tu domain 2	OG0002958	-		-
		OG0000013	Periplasmic copper-binding protein (NosD)	OG0002772	Phosphonate ABC transporter, periplasmic		-	OG0000945	Methyl-coenzyme M reductase operon protein D	OG0002969	COG1233 Phytoene dehydrogenase and related proteins		-
		OG0000976	Catalyzes the NAD( )-dependent oxidative deamination of L-alanine to pyruvate, and the reverse reaction, the reductive amination of pyruvate	OG0002805	-		-	OG0000946	PFAM Methyl-coenzyme M reductase operon protein C	OG0002991	-		-
		OG0001089	Domain of unknown function (DUF1805)	OG0001134	TIGRFAM hydrogenase expression formation protein HypE		-	OG0000954	PFAM TfuA domain protein, core	OG0003001	-		-
		OG0000482	PFAM FeoA family protein	OG0001198	TIGRFAM hydrogenase expression formation protein HypD		-	OG0000983	PFAM low molecular weight phosphotyrosine protein phosphatase	OG0003004	-		-
		OG0001290	Radical SAM superfamily	OG0000025	-		-	OG0000997	Catalyzes the conversion of AMP and phosphate to adenine and ribose 1,5-bisphosphate (R15P). Exhibits phosphorylase activity toward CMP and UMP in addition to AMP. Functions in an archaeal AMP degradation pathway, together with R15P isomerase and RubisCO	OG0003011	Isochorismatase family		-
		OG0001325	Pyridine nucleotide-disulphide oxidoreductase	OG0001078	-		-	OG0001014	Uncharacterized protein conserved in archaea (DUF2124)	OG0003051	-		-
		OG0001575	-	OG0000911	Transcriptional regulators		-	OG0001027	Has an important function as a repair enzyme for proteins that have been inactivated by oxidation. Catalyzes the reversible oxidation-reduction of methionine sulfoxide in proteins to methionine	OG0003062	TIGRFAM phosphohistidine phosphatase SixA		-
		OG0000196	Catalyzes the gamma-elimination of phosphate from L- phosphohomoserine and the beta-addition of water to produce L- threonine	OG0001304	COG0467 RecA-superfamily ATPases implicated in signal transduction		-	OG0001032	PFAM glutamate synthase alpha subunit domain protein	OG0003065	COG1403 Restriction endonuclease		-
		OG0000003	PFAM PKD domain containing protein	OG0000304	COG1132 ABC-type multidrug transport system, ATPase and permease components		-	OG0001046	PFAM pyruvate flavodoxin ferredoxin oxidoreductase domain protein	OG0003066	PAS domain		-
		OG0000942	-	OG0001079	Acetyltransferase (GNAT) domain		-	OG0001064	Acetyltransferase (GNAT) domain	OG0003070	-		-
		OG0000262	TIGRFAM intracellular protease, PfpI family	OG0001551	-		-	OG0001068	Domain of unknown function (DUF1610)	OG0003071	PFAM ABC transporter, ATPase		-
		OG0000966	-	OG0001612	Specifically methylates the pseudouridine at position 1915 (m3Psi1915) in 23S rRNA		-	OG0001078	-	OG0003075	TIGRFAM Na Pi-cotransporter II-related protein		-
		OG0000014	PFAM periplasmic binding protein	OG0001645	PFAM Glutamine amidotransferase class-I		-	OG0001104	CRS1_YhbY	OG0003102	-		-
		OG0000246	Pyridine nucleotide-disulphide oxidoreductase, dimerisation domain	OG0001596	-		-	OG0001118	-	OG0003103	-		-
		OG0000284	Metallo-beta-lactamase superfamily	OG0001317	PFAM plasmid stabilization system		-	OG0001119	PFAM Ribonuclease III	OG0003107	Cupin 2, conserved barrel domain protein		-
		OG0000732	Sulfide dehydrogenase (Flavoprotein) subunit SudB	OG0001418	PFAM Nucleotidyl transferase		-	OG0001129	ATP-citrate synthase (ATP-citrate (Pro-S-)-lyase)(Citrate cleavage enzyme)	OG0003112	-		-
		OG0000061	FecCD transport family	OG0001435	-		-	OG0001153	-	OG0003113	-		-
		OG0000943	TIGRFAM glutamate synthase (NADPH), homotetrameric	OG0001605	-		-	OG0001177	PFAM TspO MBR family	OG0003117	-		-
		OG0000986	PFAM amino acid-binding ACT domain protein	OG0001774	CO dehydrogenase/acetyl-CoA synthase delta subunit		-	OG0001202	COG1668 ABC-type Na efflux pump, permease component	OG0003138	-		-
		OG0000925	Nucleoside 2-deoxyribosyltransferase like	OG0001414	acid phosphatase activity		-	OG0001213	PFAM glycosyl transferase family 39	OG0003143	PFAM methyltransferase		-
		OG0000950	SMART Elongator protein 3 MiaB NifB	OG0001843	RibD C-terminal domain		-	OG0001240	-	OG0003246	-		-
		OG0000991	PFAM Exonuclease VII small subunit	OG0001912	Branched-chain amino acid transport system permease component		-	OG0001244	Uncharacterised conserved protein (DUF2156)	OG0003248	-		-
		OG0000098	PFAM Dinitrogenase iron-molybdenum cofactor biosynthesis	OG0001970	Glutathione synthase ribosomal protein S6 modification enzyme (Glutaminyl transferase)		-	OG0001263	ABC-2 family transporter protein	OG0003254	ABC-type cobalt transport system, permease component		-
		OG0001009	Part of the energy-coupling factor (ECF) transporter complex CbiMNOQ involved in cobalt import	OG0001971	RimK-like ATPgrasp N-terminal domain		-	OG0001280	PFAM Xylose isomerase domain protein TIM barrel	OG0003255	Winged helix DNA-binding domain		-
		OG0000112	Cytotoxic translational repressor of toxin-antitoxin stability system	OG0001983	Acetyltransferase (GNAT) family		-	OG0001310	-	OG0003301	-		-
		OG0001057	-	OG0001887	Methyltransferase domain		-	OG0001315	Uncharacterised conserved protein UCP033563	OG0003304	-		-
		OG0000229	Protein of unknown function (DUF1616)	OG0002089	Bacterial regulatory protein, arsR family		-	OG0001332	Phosphate transport regulator	OG0003308	-		-
		OG0001045	Uncharacterized protein conserved in archaea (DUF2117)	OG0002106	Polyketide cyclase / dehydrase and lipid transport		-	OG0001345	PFAM Radical SAM domain protein	OG0003311	Rhomboid family		-
		OG0001059	Fe-S protein PflX, homolog of pyruvate formate lyase activating	OG0002026	TIGRFAM drug resistance transporter, Bcr CflA subfamily		-	OG0001353	PFAM 4Fe-4S ferredoxin, iron-sulfur binding domain protein	OG0003316	polysaccharide deacetylase		-
		OG0000390	TIGRFAM lysine 2,3-aminomutase YodO family protein	OG0000351	Transposase and inactivated derivatives		-	OG0001397	Catalyzes the condensation of 4-aminobenzoate (pABA) with 5-phospho-alpha-D-ribose 1-diphosphate (PRPP) to produce beta-ribofuranosylaminobenzene 5'-phosphate (beta-RFA-P)	OG0000181	-		-
		OG0000512	Sodium/calcium exchanger protein	OG0001048	Protein of unknown function (DUF3344)		-	OG0001400	COG1502 Phosphatidylserine phosphatidylglycerophosphate cardiolipi n synthases and related enzymes	OG0000266	COGs COG3415 Transposase and inactivated derivatives		-
		OG0000961	HIT domain	OG0001861	zinc ion binding		-	OG0001401	Oxidoreductase	OG0000351	Transposase and inactivated derivatives		-
		OG0000134	type I restriction modification DNA specificity domain	OG0001981	Secreted repeat of unknown function		-	OG0001557	-	OG0000828	Flavoprotein		-
		OG0001120	Cl- channel, voltage-gated family protein	OG0002080	DNA polymerase beta domain protein region		-	OG0001559	beta-lactamase domain protein	OG0000917	Winged helix-turn-helix		-
		OG0000225	Subunit R is required for both nuclease and ATPase activities, but not for modification	OG0002131	SWIM zinc finger		-	OG0001587	COG1202 Superfamily II helicase, archaea-specific	OG0001048	Protein of unknown function (DUF3344)		-
		OG0000239	4Fe-4S dicluster domain	OG0002183	Dienelactone hydrolase family		-	OG0001592	COG0494 NTP pyrophosphohydrolases including oxidative damage repair enzymes	OG0001063	WD40-like Beta Propeller Repeat		-
		OG0001249	Catalyzes the reduction of 1-pyrroline-5-carboxylate (PCA) to L-proline	OG0000684	COG3436 Transposase and inactivated derivatives		-	OG0001594	phosphohydrolase (DHH superfamily)	OG0001132	COG3547 Transposase and inactivated derivatives		-
		OG0001381	-	OG0001318	Protein of unknown function (DUF3344)		-	OG0001617	-	OG0001158	Domain of unknown function (DUF2088)		-
		OG0001232	S-adenosyl-l-methionine hydroxide adenosyltransferase	OG0001781	Protein of unknown function (DUF1646)		-	OG0000015	Iron-sulfur cluster-binding domain	OG0001161	Non-catalytic component of the exosome, which is a complex involved in RNA degradation. Increases the RNA binding and the efficiency of RNA degradation. Confers strong poly(A) specificity to the exosome		-
		OG0001393	-	OG0002086	CRISPR associated protein Cas6		-	OG0000020	PFAM Uncharacterised protein family UPF0150	OG0001167	Transposase		-
		OG0001452	PspA/IM30 family	OG0002100	-		-	OG0000026	Pfam:KaiC	OG0001190	Non-catalytic component of the exosome, which is a complex involved in RNA degradation. Increases the RNA binding and the efficiency of RNA degradation. Helpful for the interaction of the exosome with A-poor RNAs		-
		OG0001438	Sodium:solute symporter family	OG0002142	Adenosylcobinamide amidohydrolase		-	OG0000098	PFAM Dinitrogenase iron-molybdenum cofactor biosynthesis	OG0001197	Catalytic component of the exosome, which is a complex involved in RNA degradation. Has 3'- 5' exoribonuclease activity. Can also synthesize heteropolymeric RNA-tails		-
		OG0001481	-	OG0001141	Protein of unknown function (DUF1670)		-	OG0000110	Belongs to the DegT DnrJ EryC1 family	OG0001203	Transglutaminase-like superfamily		-
		OG0001499	RNA-binding protein of the translin family	OG0001846	DNA-dependent DNA replication		-	OG0000115	PFAM Methyltransferase type	OG0001220	Non-catalytic component of the exosome, which is a complex involved in RNA degradation. Contributes to the structuring of the Rrp41 active site		-
		OG0000353	Catalyzes the condensation of 2 ATP molecules into cyclic di-AMP (c-di-AMP), a	OG0002217	Cytochrome b subunit of formate		-	OG0000132	PFAM Cation	OG0001226	haloacid dehalogenase-like hydrolase		-
		OG0000907	Catalyzes the stereoinversion of LL-2,6- diaminoheptanedioate (L,L-DAP) to meso-diaminoheptanedioate (meso- DAP), a precursor of L-lysine	OG0002252	-		-	OG0000138	transferase hexapeptide repeat	OG0001247	Segregation and condensation complex subunit ScpB		-
		OG0000444	phosphoesterase RecJ domain protein	OG0001182	-		-	OG0000152	Polysaccharide biosynthesis protein	OG0001250	RNA binding		-
		OG0000687	PFAM pyruvate ferredoxin flavodoxin oxidoreductase	OG0001464	to GB L77117 SP Q57808 PID 1499149 percent identity		-	OG0000188	Roadblock LC7 family protein	OG0001265	Necessary for normal cell division and for the maintenance of normal septation		-
		OG0000121	Thiol-specific peroxidase that catalyzes the reduction of hydrogen peroxide and organic hydroperoxides to water and alcohols, respectively. Plays a role in cell protection against oxidative stress by detoxifying peroxides	OG0001869	RibD C-terminal domain		-	OG0000221	Catalyzes the condensation of 4-aminobenzoate (pABA) with 5-phospho-alpha-D-ribose 1-diphosphate (PRPP) to produce beta-ribofuranosylaminobenzene 5'-phosphate (beta-RFA-P)	OG0001325	Pyridine nucleotide-disulphide oxidoreductase		-
		OG0000965	Belongs to the eIF-2B alpha beta delta subunits family	OG0002061	S-layer homology domain		-	OG0000280	PQQ-like domain	OG0001341	Metallo-beta-lactamase superfamily		-
		OG0000939	PFAM 4Fe-4S ferredoxin, iron-sulfur binding domain protein	OG0002088	Resolvase, N terminal domain		-	OG0000314	RDD family	OG0001368	Lactonase, 7-bladed beta-propeller		-
		OG0000973	PFAM glutamine amidotransferase, class-II	OG0002138	Hemerythrin HHE cation binding domain		-	OG0000342	Domain of unknown function (DUF4445)	OG0001381	-		-
		OG0001013	-	OG0002221	TIGRFAM CRISPR-associated protein Cas5		-	OG0000394	RimK domain protein ATP-grasp	OG0001382	Calcineurin-like phosphoesterase		-
		OG0001018	DNA-dependent RNA polymerase catalyzes the transcription of DNA into RNA using the four ribonucleoside triphosphates as substrates	OG0002345	mRNA binding		-	OG0000423	PFAM cobalamin (vitamin B12) biosynthesis CbiG protein	OG0001411	Heavy-metal-associated domain		-
		OG0000235	PFAM PUA domain	OG0002362	-		-	OG0000622	Belongs to the UPF0251 family	OG0001451	Glycogen debranching enzyme N terminal		-
		OG0000997	Catalyzes the conversion of AMP and phosphate to adenine and ribose 1,5-bisphosphate (R15P). Exhibits phosphorylase activity toward CMP and UMP in addition to AMP. Functions in an archaeal AMP degradation pathway, together with R15P isomerase and RubisCO	OG0002365	PFAM Phage-related baseplate assembly protein		-	OG0000856	PFAM Uroporphyrin-III C tetrapyrrole (Corrin Porphyrin) methyltransferase	OG0001467	HMGL-like		-
		OG0001014	Uncharacterized protein conserved in archaea (DUF2124)	OG0002430	Peptidase C39 family		-	OG0000861	Protein of unknown function, DUF255	OG0001532	Isocitrate/isopropylmalate dehydrogenase		-
		OG0000372	-	OG0002494	Kelch motif		-	OG0000882	Flavodoxin domain	OG0001572	Protein of unknown function (DUF1673)		-
		OG0001015	Sporulation protein YtfJ (Spore_YtfJ)	OG0002497	TIGRFAM CRISPR-associated RAMP protein, Cmr4 family		-	OG0000886	Belongs to the metallo-dependent hydrolases superfamily. Adenine deaminase family	OG0001574	Xylose isomerase-like TIM barrel		-
		OG0001124	-	OG0001716	BRO family, N-terminal domain		-	OG0000902	PFAM Uroporphyrin-III C tetrapyrrole (Corrin Porphyrin) methyltransferase	OG0001577	MFS_1 like family		-
		OG0000517	PFAM TrkA-N domain protein	OG0001730	PD-(D/E)XK nuclease superfamily		-	OG0000911	Transcriptional regulators	OG0001622	-		-
		OG0001008	PFAM Radical SAM domain protein	OG0001798	DNA methylase		-	OG0000915	The alpha subunit is responsible for the aldol cleavage of indoleglycerol phosphate to indole and glyceraldehyde 3- phosphate	OG0001655	Possibly the antitoxin component of a type II toxin- antitoxin (TA) system		-
		OG0001122	Protein of unknown function (DUF2953)	OG0001874	Cna B domain protein		-	OG0000920	TIGRFAM glutamine amidotransferase of anthranilate synthase	OG0001677	Peptidase family M50		-
		OG0000990	Belongs to the Glu Leu Phe Val dehydrogenases family	OG0001977	Methanol-cobalamin methyltransferase B subunit		-	OG0000933	Catalyzes the methylation of C-1 in cobalt-precorrin-5B to form cobalt-precorrin-6A	OG0001681	Dodecin		-
		OG0001217	DNA-dependent RNA polymerase catalyzes the transcription of DNA into RNA using the four ribonucleoside triphosphates as substrates	OG0002199	Phage tail sheath C-terminal domain		-	OG0000953	Domain in cystathionine beta-synthase and other proteins.	OG0001694	-		-
		OG0000888	Lrp/AsnC ligand binding domain	OG0002306	Cytochrome b5-like Heme/Steroid binding domain		-	OG0000956	PFAM Precorrin-8X methylmutase CbiC CobH	OG0001732	Putative RNA methyltransferase		-
		OG0001441	PFAM glutamate synthase alpha subunit	OG0002463	Lipoate-protein ligase		-	OG0000963	Precorrin-6y C5,15-methyltransferase (Decarboxylating), CbiE subunit	OG0001737	PFAM Peptidase S24 S26A S26B, conserved region		-
		OG0001468	Clp protease	OG0002527	PIN domain		-	OG0000970	PFAM Uroporphyrin-III C tetrapyrrole (Corrin Porphyrin) methyltransferase	OG0001771	Phosphotransferase enzyme family		-
		OG0001498	MgtC family	OG0002536	Domain of unknown function (DUF1788)		-	OG0000993	catalyzes the demethylation of specific methylglutamate residues introduced into the chemoreceptors (methyl-accepting chemotaxis proteins) by CheR	OG0001783	Short C-terminal domain		-
		OG0001500	Protein of unknown function (DUF3467)	OG0002549	NurA		-	OG0000994	Domain of unknown function (DUF1890)	OG0001826	PFAM glycosyl transferase group 1		-
			-	OG0002561	Protein of unknown function (DUF1284)		-	OG0001002	-	OG0001836	NADH-ubiquinone oxidoreductase-F iron-sulfur binding region		-
			-	OG0002638	Glutamine cyclotransferase		-	OG0001051	Protein of unknown function (DUF1624)	OG0001838	-		-
			-	OG0001852	Baseplate J-like protein		-	OG0001090	Uncharacterized conserved protein (DUF2196)	OG0001861	zinc ion binding		-
			-	OG0001875	-		-	OG0001123	PFAM Major Facilitator Superfamily	OG0001872	-		-
			-	OG0001898	T4-like virus tail tube protein gp19		-	OG0001139	integral membrane protein	OG0001905	-		-
			-	OG0001945	HEAT repeats		-	OG0001211	inorganic	OG0001909	Uncharacterized ACR, COG1993		-
			-	OG0002198	SNF2 family N-terminal domain		-	OG0001258	-	OG0001932	SMART Elongator protein 3 MiaB NifB		-
			-	OG0002319	-		-	OG0001307	-	OG0001941	-		-
			-	OG0002442	-		-	OG0001347	PFAM formate nitrite transporter	OG0001969	Domain of unknown function (DUF1998)		-
			-	OG0002488	DsrH like protein		-	OG0001379	Domain of unknown function (DUF1858)	OG0001981	Secreted repeat of unknown function		-
			-	OG0002498	-		-	OG0001493	-	OG0002031	CRISPR-associated helicase, Cas3		-
			-	OG0002537	Protein phosphatase 2A homologues, catalytic domain.		-	OG0001556	-	OG0002053	TIGRFAM N-acetyl sugar amidotransferase		-
			-	OG0002570	Transcriptional regulator, TrmB		-	OG0001614	PFAM ABC transporter	OG0002054	Tubulin like		-
			-	OG0002587	-		-	OG0001619	-	OG0002080	DNA polymerase beta domain protein region		-
			-	OG0002588	-		-	OG0001620	-	OG0002085	Coenzyme PQQ synthesis protein D (PqqD)		-
			-	OG0002589	Involved in cell shape control		-	OG0001647	-	OG0002097	Putative heavy-metal chelation		-
			-	OG0002623	nitrogen fixation		-	OG0001648	-	OG0002104	Acetyltransferase (GNAT) domain		-
			-	OG0002658	LysM domain		-	OG0001650	PFAM ABC transporter	OG0002131	SWIM zinc finger		-
			-	OG0002665	Gene 25-like lysozyme		-	OG0001651	-	OG0002183	Dienelactone hydrolase family		-
			-	OG0002695	Pyridoxamine 5'-phosphate oxidase		-	OG0001657	-	OG0002191	Site-specific tyrosine recombinase, which acts by catalyzing the cutting and rejoining of the recombining DNA molecules		-
			-	OG0002701	Thioesterase-like superfamily		-	OG0001658	-	OG0002207	-		-
			-	OG0001759	-		-	OG0000155	by modhmm	OG0002208	-		-
			-	OG0002063	-		-	OG0000162	PFAM alpha beta hydrolase fold	OG0002214	-		-
			-	OG0002087	-		-	OG0000208	stage II sporulation	OG0002222	-		-
			-	OG0002113	Domain of unknown function DUF11		-	OG0000214	PFAM transcriptional regulator TrmB	OG0002229	-		-
			-	OG0002233	Belongs to the glycosyl hydrolase 8 (cellulase D) family		-	OG0000250	Flagellin is the subunit protein which polymerizes to form the filaments of archaeal flagella	OG0002253	ATP:corrinoid adenosyltransferase BtuR/CobO/CobP		-
			-	OG0002367	ATP-dependent peptidase activity		-	OG0000282	PFAM oxidoreductase domain protein	OG0002283	Permease family		-
			-	OG0002518	Ferric uptake regulator family		-	OG0000335	Cytochrome C biogenesis protein transmembrane region	OG0002290	Protein of unknown function (DUF790)		-
			-	OG0002566	pyrimidine nucleotide-sugar transmembrane transport		-	OG0000340	UDP-N-acetylglucosamine 2-epimerase	OG0002298	-		-
			-	OG0002575	Amino acid permease		-	OG0000372	-	OG0002305	TfoX N-terminal domain		-
			-	OG0002582	COG3420 Nitrous oxidase accessory protein		-	OG0000453	PFAM Radical SAM domain protein	OG0002325	PFAM CRISPR-associated protein TM1801		-
			-	OG0002590	-		-	OG0000469	PFAM phosphatidate cytidylyltransferase	OG0002328	Transport of potassium into the cell		-
			-	OG0002592	-		-	OG0000802	Protein of unknown function (DUF2769)	OG0002331	PFAM Glycosyl transferase family 2		-
			-	OG0002594	-		-	OG0000837	Predicted metal-binding protein (DUF2284)	OG0002334	Catalyzes the irreversible beta-carboxylation of phosphoenolpyruvate (PEP) to form oxaloacetate (OAA), a four- carbon dicarboxylic acid source for the tricarboxylic acid cycle		-
			-	OG0002613	-		-	OG0000855	PFAM Lysine exporter protein (LYSE YGGA)	OG0002335	YoaP-like		-
			-	OG0002618	-		-	OG0000873	Part of a complex that catalyzes the formation of methyl-coenzyme M and tetrahydromethanopterin from coenzyme M and methyl-tetrahydromethanopterin. This is an energy-conserving, sodium-ion translocating step	OG0002344	PFAM Uncharacterised protein family UPF0150		-
			-	OG0002648	-		-	OG0000937	Part of a complex that catalyzes the formation of methyl-coenzyme M and tetrahydromethanopterin from coenzyme M and methyl-tetrahydromethanopterin. This is an energy-conserving, sodium-ion translocating step	OG0002412	PFAM Linocin_M18 bacteriocin protein		-
			-	OG0002666	-		-	OG0000938	Part of a complex that catalyzes the formation of methyl-coenzyme M and tetrahydromethanopterin from coenzyme M and methyl-tetrahydromethanopterin. This is an energy-conserving, sodium-ion translocating step	OG0002416	-		-
			-	OG0002698	Hydantoinase B/oxoprolinase		-	OG0000941	Putative exonuclease SbcCD, C subunit	OG0002417	AraC-like ligand binding domain		-
			-	OG0002702	transmembrane transporter activity		-	OG0000989	Belongs to the UPF0758 family	OG0002423	-		-
			-	OG0002716	-		-	OG0001009	Part of the energy-coupling factor (ECF) transporter complex CbiMNOQ involved in cobalt import	OG0002424	Glycosyl transferases group 1		-
			-	OG0002721	-		-	OG0001075	Rossmann fold nucleotide-binding protein	OG0002453	-		-
			-	OG0002722	-		-	OG0001087	-	OG0002475	AAA domain		-
			-	OG0002723	-		-	OG0001103	RNase_H superfamily	OG0002478	TIGRFAM CDP-glucose 4,6-dehydratase		-
			-	OG0002724	-		-	OG0001105	-	OG0002520	Clostripain family		-
			-	OG0002727	phosphonoacetaldehyde hydrolase activity		-	OG0001160	Probably involved in the biogenesis of the ribosome	OG0002525	-		-
			-	OG0002766	Reduction of activated sulfate into sulfite		-	OG0001176	PFAM LemA family	OG0002560	Asp/Glu/Hydantoin racemase		-
			-	OG0002818	-		-	OG0001223	PFAM Aminotransferase class I and II	OG0002562	Protein of unknown function, DUF488		-
			-	OG0002820	Bacterial regulatory protein, arsR family		-	OG0001271	PDGLE domain	OG0002597	-		-
			-	OG0002822	amino acid activation for nonribosomal peptide biosynthetic process		-	OG0001304	COG0467 RecA-superfamily ATPases implicated in signal transduction	OG0002619	Sodium/hydrogen exchanger family		-
			-	OG0002849	Archaeal Type IV pilin, N-terminal		-	OG0001308	-	OG0002656	Domain of unknown function (DUF4062)		-
			-	OG0002855	-		-	OG0001367	PFAM major facilitator superfamily MFS_1	OG0002704	PFAM 4Fe-4S ferredoxin, iron-sulfur binding domain protein		-
			-	OG0002857	Cytochrome c		-	OG0001430	beta-lactamase domain protein	OG0002747	-		-
			-	OG0002861	Uncharacterized metal-binding protein (DUF2227)		-	OG0001461	PFAM thioesterase superfamily	OG0002757	Formate hydrogenlyase subunit 6 NADH ubiquinone oxidoreductase 23 kD subunit (chain I)		-
			-	OG0002863	Peptidase family M48		-	OG0001519	-	OG0002769	Putative ATP-dependant zinc protease		-
			-	OG0002870	ATPase family associated with various cellular activities (AAA)		-	OG0001591	Stage II sporulation protein M	OG0002774	-		-
			-	OG0002874	-		-	OG0001618	UDP-glucose:hexose-1-phosphate uridylyltransferase activity	OG0002787	-		-
			-	OG0002877	-		-	OG0001646	-	OG0002826	-		-
			-	OG0002879	-		-	OG0001649	-	OG0002833	Domain of unknown function (DUF4352)		-
			-	OG0002881	-		-	OG0001654	PFAM oxidoreductase nitrogenase, component 1	OG0002837	Phenazine biosynthesis protein phzf family		-
			-	OG0002882	-		-	OG0001698	-	OG0002895	von willebrand factor, type A		-
			-	OG0002883	Histone deacetylase domain		-	OG0001705	Domain of unknown function (DUF1917)	OG0002928	-		-
			-	OG0002884	protein (ATP-grasp superfamily)		-	OG0001707	-	OG0002944	Putative transposon-encoded protein (DUF2080)		-
			-	OG0002885	-		-	OG0000112	Cytotoxic translational repressor of toxin-antitoxin stability system	OG0002993	Dolichyl-phosphate-mannose-protein mannosyltransferase		-
			-	OG0002886	-		-	OG0000127	cellular potassium ion transport	OG0003005	Nuclease-related domain		-
			-	OG0002888	-		-	OG0000143	Pfam:UPF0118	OG0003053	Iron only nitrogenase protein AnfO (AnfO_nitrog)		-
			-	OG0002889	-		-	OG0000211	Enoyl-(Acyl carrier protein) reductase	OG0003054	-		-
			-	OG0002916	-		-	OG0000312	PFAM aldo keto reductase	OG0003059	-		-
			-	OG0002917	-		-	OG0000365	Protein of unknown function DUF45	OG0003061	SnoaL-like polyketide cyclase		-
			-	OG0002948	-		-	OG0000374	Part of a complex that catalyzes the reversible cleavage of acetyl-CoA, allowing	OG0003067	endonuclease activity		-
			-	OG0002962	PFAM 2-hydroxyglutaryl-CoA dehydratase, D-component		-	OG0000414	TIGRFAM molybdenum ABC transporter, periplasmic molybdate-binding protein	OG0003068	ABC-type transport system, periplasmic component surface lipoprotein		-
			-	OG0002964	Transfers and isomerizes the ribose moiety from AdoMet to the 7-aminomethyl group of 7-deazaguanine (preQ1-tRNA) to give epoxyqueuosine (oQ-tRNA)		-	OG0000590	Part of a complex that catalyzes the reversible cleavage of acetyl-CoA, allowing	OG0003072	Uncharacterized protein conserved in bacteria (DUF2064)		-
			-	OG0000302	Protein of unknown function (DUF4013)		-	OG0000753	toxin activity	OG0003076	-		-
			-	OG0001200	PFAM carbonic anhydrase		-	OG0000836	PFAM Cobalt transport protein	OG0003104	Predicted ATPase of the ABC class		-
			-	OG0001315	Uncharacterised conserved protein UCP033563		-	OG0000921	PFAM Phosphatidylglycerophosphatase A	OG0003118	-		-
			-	OG0001353	PFAM 4Fe-4S ferredoxin, iron-sulfur binding domain protein		-	OG0000958	Short repeat of unknown function (DUF308)	OG0003120	PFAM Ribonuclease III		-
			-	OG0001347	PFAM formate nitrite transporter		-	OG0000967	Belongs to the arginase family	OG0003163	Domain of unknown function (DUF4143)		-
			-	OG0001379	Domain of unknown function (DUF1858)		-	OG0000968	Yip1 domain	OG0003188	Uncharacterized conserved protein (DUF2164)		-
			-	OG0001489	HI0933 family		-	OG0000974	ATP-binding region, ATPase domain protein	OG0003199	alkylbase DNA N-glycosylase activity		-
			-	OG0001327	DNA methylase		-	OG0001003	PFAM glycosyl transferase group 1	OG0003216	Toxic component of a toxin-antitoxin (TA) module. An RNase		-
			-	OG0001537	NfeD-like C-terminal, partner-binding		-	OG0001010	PFAM TrkA-C domain protein	OG0003243	-		-
			-	OG0000260	protein conserved in archaea		-	OG0001017	ABC 3 transport family	OG0003244	cobalamin (vitamin B12) biosynthesis CbiX protein		-
			-	OG0000885	META domain		-	OG0001020	Belongs to the eukaryotic ribosomal protein eL40 family	OG0003247	-		-
			-	OG0001549	-		-	OG0001041	Bifunctional nuclease	OG0003258	-		-
			-	OG0001439	Domain of unknown function (DUF4349)		-	OG0001052	Mitochondrial biogenesis AIM24	OG0003262	Acetyltransferase (GNAT) domain		-
			-	OG0001509	Holliday junction DNA helicase ruvB C-terminus		-	OG0001057	-	OG0003264	Ribonuclease		-
			-	OG0001516	PFAM ABC transporter		-	OG0001072	Thioesterase superfamily	OG0003297	COG0436 Aspartate tyrosine aromatic aminotransferase		-
			-	OG0001540	RuvA, C-terminal domain		-	OG0001084	Pyruvate flavodoxin ferredoxin oxidoreductase domain protein	OG0003302	membrane		-
			-	OG0001212	Domain of unknown function (DUF333)		-	OG0001088	Conserved region in glutamate synthase	OG0003310	-		-
			-	OG0001504	4-oxalocrotonate tautomerase		-	OG0001094	Transcriptional regulator	OG0003313	-		-
			-	OG0001520	-		-	OG0001107	Uncharacterised ArCR, COG2043	OG0003315	PFAM DsrE DsrF-like family		-
			-	OG0000288	PFAM transposase, IS4 family protein		-	OG0001110	Mediates influx of magnesium ions	OG0003346	-		-
			-	OG0001450	Sodium Bile acid symporter family		-	OG0001133	AAA domain, putative AbiEii toxin, Type IV TA system	OG0003358	-		-
			-	OG0001554	PFAM Cobyrinic acid a,c-diamide synthase		-	OG0001136	PFAM type II secretion system protein E	OG0003385	Phytoene squalene synthetase		-
			-	OG0001613	Phosphate-starvation-inducible E		-	OG0001137	type II secretion system protein	OG0003419	COG1472 Beta-glucosidase-related glycosidases		-
			-	OG0001640	LexA-binding, inner membrane-associated putative hydrolase		-	OG0001162	PFAM ABC-2 type transporter	OG0003425	Elongation factor Tu C-terminal domain		-
			-	OG0000317	Formate hydrogenlyase subunit 6 NADH ubiquinone oxidoreductase 23 kD subunit (chain I)		-	OG0001172	metallopeptidase activity	OG0003431	glucosylceramidase activity		-
			-	OG0001510	TIGRFAM methyltransferase FkbM family		-	OG0001184	KaiC	OG0003434	Acyltransferase family		-
			-	OG0001472	ABC-type branched-chain amino acid transport systems, periplasmic component		-	OG0001186	PFAM DNA alkylation repair enzyme	OG0003438	-		-
			-	OG0001571	CAAX protease self-immunity		-	OG0001188	Predicted membrane protein (DUF2207)	OG0003443	UPF0126 domain		-
			-	OG0001683	-		-	OG0001241	sugar phosphatases of the HAD superfamily	OG0003484	ATP cone domain		-
			-	OG0001691	Polysaccharide biosynthesis protein		-	OG0001257	Catalyzes two subsequent steps in gluconeogenesis the aldol condensation of dihydroxyacetone phosphate (DHAP) and glyceraldehyde-3-phosphate (GA3P) to fructose-1,6-bisphosphate (FBP), and the dephosphorylation of FBP to fructose-6-phosphate (F6P)	OG0003497	-		-
			-	OG0001793	Proline dehydrogenase		-	OG0001273	structural constituent of ribosome	OG0003501	-		-
			-	OG0001867	-		-	OG0001301	TIGRFAM methionine-R-sulfoxide reductase	OG0003509	deoxyhypusine monooxygenase activity		-
			-	OG0001546	glycosyl transferase family 2		-	OG0001321	Protein of unknown function (DUF1622)	OG0003511	-		-
			-	OG0001923	Glycosyl transferase 4-like domain		-	OG0001419	DEAD DEAH box helicase	OG0003566	Acetyltransferase (GNAT) family		-
			-	OG0001547	4-amino-4-deoxy-alpha-L-arabinopyranosyl undecaprenyl phosphate biosynthetic process		-	OG0001456	Chemotaxis signal transduction system protein F from archaea	OG0003572	-		-
			-	OG0001600	ABC-2 type transporter		-	OG0001462	COG0467 RecA-superfamily ATPases implicated in signal transduction	OG0003575	bacterial-type flagellum-dependent cell motility		-
			-	OG0001803	ATPases associated with a variety of cellular activities		-	OG0001495	Probably functions as a manganese efflux pump	OG0003578	-		-
			-	OG0001821	DEAD-like helicases superfamily		-	OG0001538	Mitochondrial small ribosomal subunit Rsm22	OG0003579	-		-
			-	OG0001687	Ku70 and Ku80 are 70kDa and 80kDa subunits of the Lupus Ku autoantigen		-	OG0001550	Anaerobic ribonucleoside-triphosphate reductase	OG0003582	Protein of unknown function (DUF3795)		-
			-	OG0001824	DNA photolyase		-	OG0001638	Uncharacterized protein, homolog of nitrogen regulatory protein PII	OG0003586	helicase C-terminal domain protein		-
			-	OG0002047	PPIC-type PPIASE domain		-	OG0001702	Belongs to the small heat shock protein (HSP20) family	OG0003588	FIST N domain		-
			-	OG0001741	Cytidylyltransferase		-	OG0001747	-	OG0003589	-		-
			-	OG0002023	-		-	OG0001749	-	OG0003591	-		-
			-	OG0002055	-		-	OG0001753	-	OG0003594	-		-
			-	OG0001692	Predicted membrane protein (DUF2254)		-	OG0001755	-	OG0003595	-		-
			-	OG0001757	Helicase		-		-	OG0003629	Phosphate transport regulator		-
			-	OG0001953	Domain of unknown function (DUF4258)		-		-	OG0003630	cog1234, metal-dependent hydrolases of the beta-lactamase superfamily III		-
			-	OG0001993	Alpha amylase, catalytic domain		-		-	OG0003631	VTC domain		-
			-	OG0002234	PFAM glutamate--cysteine ligase, GCS2		-		-	OG0003632	Domain of unknown function (DUF4956)		-
			-	OG0001572	Protein of unknown function (DUF1673)		-		-	OG0000671	TRAM domain		-
			-	OG0001577	MFS_1 like family		-		-	OG0000684	COG3436 Transposase and inactivated derivatives		-
			-	OG0001771	Phosphotransferase enzyme family		-		-	OG0000686	Domain of unknown function		-
			-	OG0002031	CRISPR-associated helicase, Cas3		-		-	OG0000804	SPTR Transposase, IS4 family protein		-
			-	OG0002207	-		-		-	OG0001091	Uncharacterised protein family (UPF0175)		-
			-	OG0002290	Protein of unknown function (DUF790)		-		-	OG0001145	Pyridine nucleotide-disulphide oxidoreductase, dimerisation domain		-
			-	OG0002298	-		-		-	OG0001195	Domain of unknown function (DUF3368)		-
			-	OG0002335	YoaP-like		-		-	OG0001227	Myo-inositol-1-phosphate synthase		-
			-	OG0001848	Type III restriction		-		-	OG0001232	S-adenosyl-l-methionine hydroxide adenosyltransferase		-
			-	OG0002002	Toxic component of a toxin-antitoxin (TA) module. An RNase		-		-	OG0001262	CDP-alcohol phosphatidyltransferase		-
			-	OG0002037	Involved in the import of queuosine (Q) precursors, required for Q precursor salvage		-		-	OG0001270	FAD linked oxidases, C-terminal domain		-
			-	OG0002213	PDGLE domain		-		-	OG0001318	Protein of unknown function (DUF3344)		-
			-	OG0002309	Catalyzes the dephosphorylation of undecaprenyl diphosphate (UPP)		-		-	OG0001326	-		-
			-	OG0002312	Substrate binding domain of ABC-type glycine betaine transport system		-		-	OG0001342	Flavin containing amine oxidoreductase		-
			-	OG0002321	Putative zinc- or iron-chelating domain		-		-	OG0001393	-		-
			-	OG0002377	PLD-like domain		-		-	OG0001404	Eco57I restriction-modification methylase		-
			-	OG0002426	B-1 B cell differentiation		-		-	OG0001452	PspA/IM30 family		-
			-	OG0002440	probably involved in cell wall		-		-	OG0001470	NADH:flavin oxidoreductase / NADH oxidase family		-
			-	OG0001770	HD domain		-		-	OG0001536	Part of the twin-arginine translocation (Tat) system that transports large folded proteins containing a characteristic twin-arginine motif in their signal peptide across membranes. TatA could form the protein-conducting channel of the Tat system		-
			-	OG0002130	DNA methylase		-		-	OG0001631	protein conserved in archaea		-
			-	OG0002220	AAA domain (dynein-related subfamily)		-		-	OG0001667	Homeodomain-like domain		-
			-	OG0002250	Iron hydrogenase small subunit		-		-	OG0001711	Putative transposase of IS4/5 family (DUF4096)		-
			-	OG0002281	-		-		-	OG0001721	Associated with various cellular activities		-
			-	OG0002385	Protein of unknown function (DUF1232)		-		-	OG0001729	Mn2 dependent serine threonine protein kinase		-
			-	OG0002491	Protein of unknown function (DUF3147)		-		-	OG0001760	-		-
			-	OG0001943	Type III restriction enzyme, res subunit		-		-	OG0001776	Fic/DOC family		-
			-	OG0002175	-		-		-	OG0001781	Protein of unknown function (DUF1646)		-
			-	OG0002180	Terminase RNaseH-like domain		-		-	OG0001796	-		-
			-	OG0002274	Nucleotidyltransferase substrate binding protein like		-		-	OG0001800	DUF3160		-
			-	OG0002512	Erythromycin esterase		-		-	OG0001816	Peptidase_C39 like family		-
			-	OG0001608	PFAM Transposase, IS204 IS1001 IS1096 IS1165		-		-	OG0001848	Type III restriction		-
			-	OG0001855	Transposase DDE domain		-		-	OG0001942	polysaccharide deacetylase		-
			-	OG0001944	beta-1,4-mannooligosaccharide phosphorylase		-		-	OG0001958	Nitroreductase		-
			-	OG0001954	Nicotianamine synthase protein		-		-	OG0001968	PFAM RNA-metabolising metallo-beta-lactamase		-
			-	OG0001959	-		-		-	OG0002002	Toxic component of a toxin-antitoxin (TA) module. An RNase		-
			-	OG0002201	transcriptional regulators containing the CopG Arc MetJ DNA-binding domain		-		-	OG0002037	Involved in the import of queuosine (Q) precursors, required for Q precursor salvage		-
			-	OG0002534	PASTA domain		-		-	OG0002042	Periplasmic copper-binding protein (NosD)		-
			-	OG0002542	RloB-like protein		-		-	OG0002049	-		-
			-	OG0002609	PFAM Plasmid pRiA4b ORF-3-like protein		-		-	OG0002086	CRISPR associated protein Cas6		-
			-	OG0002659	-		-		-	OG0002094	Glycosyltransferase 28 domain		-
			-	OG0002667	Pathogenicity locus		-		-	OG0002100	-		-
			-	OG0002678	-		-		-	OG0002105	Thioredoxin-like [2Fe-2S] ferredoxin		-
			-	OG0002680	sulfate adenylyltransferase		-		-	OG0002107	Aminotransferase class-III		-
			-	OG0002690	ATPases associated with a variety of cellular activities		-		-	OG0002142	Adenosylcobinamide amidohydrolase		-
			-	OG0002691	-		-		-	OG0002143	Glycosyl transferase family 4		-
			-	OG0002797	-		-		-	OG0002146	deoxyribonuclease I		-
			-	OG0001597	-		-		-	OG0002165	Protein of unknown function (DUF1524)		-
			-	OG0001851	Transposase DDE domain		-		-	OG0002213	PDGLE domain		-
			-	OG0001896	-		-		-	OG0002226	Glycosyltransferase family 28 C-terminal domain		-
			-	OG0001956	Transposase		-		-	OG0002267	-		-
			-	OG0002438	cobalt chelatase		-		-	OG0002309	Catalyzes the dephosphorylation of undecaprenyl diphosphate (UPP)		-
			-	OG0002439	SpoVT / AbrB like domain		-		-	OG0002312	Substrate binding domain of ABC-type glycine betaine transport system		-
			-	OG0002578	protein involved in the oxidation of intracellular sulfur		-		-	OG0002321	Putative zinc- or iron-chelating domain		-
			-	OG0002673	Protein of unknown function (DUF4255)		-		-	OG0002341	UbiA prenyltransferase family		-
			-	OG0002711	Bacterial regulatory protein, arsR family		-		-	OG0002361	-		-
			-	OG0002780	-		-		-	OG0002377	PLD-like domain		-
			-	OG0002798	The glycine cleavage system catalyzes the degradation of glycine. The H protein shuttles the methylamine group of glycine from the P protein to the T protein		-		-	OG0002400	AAA ATPase domain		-
			-	OG0002856	Involved in the catabolism of quinolinic acid (QA)		-		-	OG0002420	AIPR protein		-
			-	OG0002868	Histone deacetylase domain		-		-	OG0002426	B-1 B cell differentiation		-
			-	OG0002875	chitin catabolic process		-		-	OG0002440	probably involved in cell wall		-
			-	OG0002912	-		-		-	OG0002461	Elongator protein 3, MiaB family, Radical SAM		-
			-	OG0002952	Protein of unknown function (DUF2283)		-		-	OG0002465	Type I restriction enzyme R protein N terminus (HSDR_N)		-
			-	OG0001459	-		-		-	OG0002500	Hydrogenase 4 membrane		-
			-	OG0002058	radical SAM domain protein		-		-	OG0002506	COG1361 S-layer domain		-
			-	OG0002118	-		-		-	OG0002507	TIGRFAM transcriptional regulator, AbrB family		-
			-	OG0002152	-		-		-	OG0002511	MazF family transcriptional regulator		-
			-	OG0002197	-		-		-	OG0002532	Subtilase family		-
			-	OG0002200	PFAM Transposase, IS801 IS1294		-		-	OG0002553	TIR domain		-
			-	OG0002237	-		-		-	OG0002612	COG0210 Superfamily I DNA and RNA helicases		-
			-	OG0002264	-		-		-	OG0002624	-		-
			-	OG0002323	-		-		-	OG0002628	His Kinase A (phosphoacceptor) domain		-
			-	OG0002399	-		-		-	OG0002634	Antirestriction protein		-
			-	OG0002411	-		-		-	OG0002637	-		-
			-	OG0002451	Domain of unknown function (DUF4198)		-		-	OG0002642	Protein of unknown function (DUF2961)		-
			-	OG0002487	-		-		-	OG0002676	CorA-like Mg2+ transporter protein		-
			-	OG0002577	-		-		-	OG0002677	methyltransferase		-
			-	OG0002611	ATPase involved in DNA repair		-		-	OG0002679	S-adenosylmethionine synthetase, C-terminal domain		-
			-	OG0002636	'Cold-shock' DNA-binding domain		-		-	OG0002683	-		-
			-	OG0002639	-		-		-	OG0002687	-		-
			-	OG0002654	-		-		-	OG0002688	RmuC family		-
			-	OG0002657	-		-		-	OG0002741	Catalytic LigB subunit of aromatic ring-opening dioxygenase		-
			-	OG0002670	Thioredoxin domain		-		-	OG0002775	amino acid activation for nonribosomal peptide biosynthetic process		-
			-	OG0002700	-		-		-	OG0002821	-		-
			-	OG0002778	oligoendopeptidase F		-		-	OG0002840	conserved protein, contains double-stranded beta-helix domain		-
			-	OG0002793	Putative heavy-metal chelation		-		-	OG0002842	Flavodoxin-like fold		-
			-	OG0002825	Toxic component of a toxin-antitoxin (TA) module. An RNase		-		-	OG0002914	Ferric reductase like transmembrane component		-
			-	OG0002844	-		-		-	OG0002921	LURP-one-related		-
			-	OG0002853	-		-		-	OG0002930	ATPase involved in DNA repair		-
			-	OG0002860	SNARE associated Golgi protein		-		-	OG0002956	Peptidase family M23		-
			-	OG0002865	-		-		-	OG0002976	Protein of unknown function (DUF3467)		-
			-	OG0002869	Uncharacterized protein containing a Zn-ribbon (DUF2116)		-		-	OG0002989	Neurotransmitter-gated ion-channel ligand binding domain		-
			-	OG0002965	The glycine cleavage system catalyzes the degradation of glycine. The H protein shuttles the methylamine group of glycine from the P protein to the T protein		-		-	OG0002990	-		-
			-	OG0002974	-		-		-	OG0002996	Bacterial Ig-like domain (group 3)		-
			-	OG0002978	-		-		-	OG0002999	metallopeptidase activity		-
			-	OG0002980	-		-		-	OG0003002	Predicted membrane protein (DUF2085)		-
			-	OG0003014	iron dependent repressor		-		-	OG0003008	Metallo-beta-lactamase superfamily		-
			-	OG0003015	PFAM TPR repeat-containing protein		-		-	OG0003009	Winged helix DNA-binding domain		-
			-	OG0003024	Seven times multi-haem cytochrome CxxCH		-		-	OG0003012	Calcineurin-like phosphoesterase superfamily domain		-
			-	OG0003025	Domain of unknown function (DUF4177)		-		-	OG0003019	-		-
			-	OG0003030	4Fe-4S dicluster domain		-		-	OG0003027	CT1975-like protein		-
			-	OG0003033	-		-		-	OG0003028	CRISPR-associated protein (Cas_Cas5)		-
			-	OG0003034	Belongs to the sodium solute symporter (SSF) (TC 2.A.21) family		-		-	OG0003029	CRISPR_assoc		-
			-	OG0003036	-		-		-	OG0003055	-		-
			-	OG0003038	PFAM Major Facilitator Superfamily		-		-	OG0003057	Methyltransferase type 11		-
			-	OG0003039	-		-		-	OG0003069	-		-
			-	OG0003042	Carboxypeptidase regulatory-like domain		-		-	OG0003083	Histidine-specific methyltransferase, SAM-dependent		-
			-	OG0003043	-		-		-	OG0003085	Bacterial capsule synthesis protein PGA_cap		-
			-	OG0003044	-		-		-	OG0003095	ATP10 protein		-
			-	OG0003045	-		-		-	OG0003101	-		-
			-	OG0003046	PFAM PUA domain containing protein		-		-	OG0003110	Helix-turn-helix domain		-
			-	OG0003047	-		-		-	OG0003119	PFAM periplasmic copper-binding		-
			-	OG0003048	-		-		-	OG0003125	PFAM Pyridoxal-dependent decarboxylase		-
			-	OG0003049	-		-		-	OG0003141	-		-
			-	OG0003050	4Fe-4S dicluster domain		-		-	OG0003193	metallophosphoesterase		-
			-	OG0003124	-		-		-	OG0003195	B-1 B cell differentiation		-
			-	OG0003126	-		-		-	OG0003197	-		-
			-	OG0003127	-		-		-	OG0003198	-		-
			-	OG0003130	-		-		-	OG0003218	defense response to virus		-
			-	OG0003133	Hydroxymethylglutaryl-coenzyme A synthase N terminal		-		-	OG0003219	-		-
			-	OG0003151	-		-		-	OG0003220	CRISPR-associated protein (Cas_Cas2CT1978)		-
			-	OG0003152	-		-		-	OG0003239	PFAM CRISPR-associated protein TM1812		-
			-	OG0003153	-		-		-	OG0003245	metallopeptidase activity		-
			-	OG0001112	TIGRFAM NiFe hydrogenase maturation protein HypF		-		-	OG0003261	-		-
			-	OG0001199	PFAM CBS domain containing protein		-		-	OG0003300	-		-
			-	OG0001277	TIGRFAM hydrogenase assembly chaperone hypC hupF		-		-	OG0003303	-		-
			-	OG0001331	-		-		-	OG0003305	-		-
			-	OG0000959	PFAM PEGA domain		-		-	OG0003307	Short repeat of unknown function (DUF308)		-
			-	OG0001310	-		-		-	OG0003312	-		-
			-	OG0001461	PFAM thioesterase superfamily		-		-	OG0003317	-		-
			-	OG0001419	DEAD DEAH box helicase		-		-	OG0003319	PIN domain		-
			-	OG0001116	Ppx GppA phosphatase		-		-	OG0003326	-		-
			-	OG0001165	DNA polymerase elongation subunit (Family B)		-		-	OG0003355	-		-
			-	OG0001521	PFAM Pyridoxamine 5'-phosphate		-		-	OG0003357	Acetyltransferase (GNAT) domain		-
			-	OG0001553	Catalyzes the reversible transfer of the terminal phosphate of ATP to form a long-chain polyphosphate (polyP)		-		-	OG0003421	-		-
			-	OG0001639	Crossover junction endodeoxyribonuclease RuvC		-		-	OG0003442	Bacteriocin-protection, YdeI or OmpD-Associated		-
			-	OG0001274	Flavodoxin		-		-	OG0003480	Protease prsW family		-
			-	OG0001394	Nitroreductase family		-		-	OG0003485	-		-
			-	OG0001535	Acetyltransferase (GNAT) domain		-		-	OG0003488	transferase		-
			-	OG0001641	glycosyl transferase, family 39		-		-	OG0003489	coenzyme F390 synthetase		-
			-	OG0001731	Ferritin-like domain		-		-	OG0003491	-		-
			-	OG0000240	ABC-2 family transporter protein		-		-	OG0003492	-		-
			-	OG0001434	PFAM Protein kinase domain		-		-	OG0003493	-		-
			-	OG0001475	Metallo-beta-lactamase superfamily		-		-	OG0003496	-		-
			-	OG0001579	SnoaL-like polyketide cyclase		-		-	OG0003502	-		-
			-	OG0001743	Domain of unknown function (DUF3458_C) ARM repeats		-		-	OG0003503	-		-
			-	OG0001885	Pyridoxamine 5'-phosphate oxidase		-		-	OG0003515	-		-
			-	OG0001389	Peptidase domain protein		-		-	OG0003521	membrane		-
			-	OG0001688	to orf3 of fosmid clone 4B7mr3		-		-	OG0003525	-		-
			-	OG0001717	PFAM Uncharacterised protein family UPF0150		-		-	OG0003563	-		-
			-	OG0002163	Bifunctional enzyme with both catalase and broad- spectrum peroxidase activity		-		-	OG0003568	Catalyzes the conversion of uracil and 5-phospho-alpha- D-ribose 1-diphosphate (PRPP) to UMP and diphosphate		-
			-	OG0001894	Sulfatase		-		-	OG0003570	-		-
			-	OG0002079	Transglutaminase-like superfamily		-		-	OG0003573	PGAP1-like protein		-
			-	OG0002154	COG0380 Trehalose-6-phosphate synthase		-		-	OG0003574	Outer envelope protein 64		-
			-	OG0002258	LUD domain		-		-	OG0003576	-		-
			-	OG0001209	-		-		-	OG0003580	-		-
			-	OG0002182	-		-		-	OG0003583	Sulphur transport		-
			-	OG0001905	-		-		-	OG0003584	-		-
			-	OG0002054	Tubulin like		-		-	OG0003624	PFAM Radical SAM domain protein		-
			-	OG0002097	Putative heavy-metal chelation		-		-	OG0003626	transferase activity, transferring hexosyl groups		-
			-	OG0002208	-		-		-	OG0003661	COG0382 4-hydroxybenzoate polyprenyltransferase and related prenyltransferases		-
			-	OG0002222	-		-		-	OG0003704	-		-
			-	OG0002229	-		-		-	OG0003717	DNA polymerase IV (family X)		-
			-	OG0002253	ATP:corrinoid adenosyltransferase BtuR/CobO/CobP		-		-	OG0003720	-		-
			-	OG0001711	Putative transposase of IS4/5 family (DUF4096)		-		-	OG0003724	Phosphohydrolase		-
			-	OG0001800	DUF3160		-		-	OG0003773	-		-
			-	OG0001942	polysaccharide deacetylase		-		-	OG0003778	-		-
			-	OG0002165	Protein of unknown function (DUF1524)		-		-	OG0003781	Antibiotic biosynthesis monooxygenase		-
			-	OG0002226	Glycosyltransferase family 28 C-terminal domain		-		-	OG0003783	-		-
			-	OG0002341	UbiA prenyltransferase family		-		-	OG0003793	PFAM Cupin 2, conserved barrel domain protein		-
			-	OG0002461	Elongator protein 3, MiaB family, Radical SAM		-		-	OG0003863	-		-
			-	OG0002507	TIGRFAM transcriptional regulator, AbrB family		-		-	OG0003871	-		-
			-	OG0002006	oxidoreductase activity, acting on the aldehyde or oxo group of donors, disulfide as acceptor		-		-	OG0003873	-		-
			-	OG0002186	PFAM Aminotransferase class I and II		-		-	OG0003874	-		-
			-	OG0002256	Transcriptional		-		-	OG0003878	-		-
			-	OG0002299	Domain of unknown function (DUF378)		-		-	OG0003880	-		-
			-	OG0002340	Protein of unknown function DUF262		-		-	OG0003883	-		-
			-	OG0002456	Protein of unknown function DUF262		-		-	OG0003884	-		-
			-	OG0002573	amino acid		-		-	OG0003929	-		-
			-	OG0002644	Tex-like protein N-terminal domain		-		-	OG0003934	-		-
			-	OG0002003	DNA methylase		-		-	OG0003936	-		-
			-	OG0002059	Toxic component of a toxin-antitoxin (TA) module. An RNase		-		-	OG0003937	-		-
			-	OG0002447	Domain of unknown function (DUF4386)		-		-	OG0000165	-		-
			-	OG0002543	IrrE N-terminal-like domain		-		-	OG0000960	COG3385 FOG Transposase and inactivated derivatives		-
			-	OG0002699	Domain of unknown function (DUF427)		-		-	OG0001025	Non-histone chromosomal protein MC1		-
			-	OG0002355	DDE superfamily endonuclease		-		-	OG0001141	Protein of unknown function (DUF1670)		-
			-	OG0002519	Peptidase family M20/M25/M40		-		-	OG0001194	Catalyzes the ATP- and formate-dependent formylation of 5-aminoimidazole-4-carboxamide-1-beta-d-ribofuranosyl 5'- monophosphate (AICAR) to 5-formaminoimidazole-4-carboxamide-1- beta-d-ribofuranosyl 5'-monophosphate (FAICAR) in the absence of folates		-
			-	OG0002538	KilA-N		-		-	OG0001210	PFAM Collagen-binding surface protein Cna-like, B-type domain		-
			-	OG0002541	AAA domain, putative AbiEii toxin, Type IV TA system		-		-	OG0001255	haloacid dehalogenase-like hydrolase		-
			-	OG0002593	EamA-like transporter family		-		-	OG0001261	-		-
			-	OG0002605	PFAM DsrE family protein		-		-	OG0001264	CAAX protease self-immunity		-
			-	OG0002622	ATPase family associated with various cellular activities (AAA)		-		-	OG0001269	Iron-sulphur cluster biosynthesis		-
			-	OG0002633	CRISPR-associated RAMP protein, Csm3 family		-		-	OG0001286	Uncharacterized conserved protein (DUF2149)		-
			-	OG0002710	-		-		-	OG0001288	Catalyzes the formation of archaetidylethanolamine (PtdEtn) from archaetidylserine (PtdSer)		-
			-	OG0002900	JAB/MPN domain		-		-	OG0001291	metal ion binding		-
			-	OG0002919	AAA domain		-		-	OG0001298	-		-
			-	OG0002943	Na -dependent transporter		-		-	OG0001322	Part of a complex that catalyzes the reversible reduction of CoM-S-S-CoB to the thiol-coenzymes H-S-CoM (coenzyme M) and H-S-CoB (coenzyme B). HdrE may be responsible for anchoring the complex to the membrane		-
			-	OG0002949	-		-		-	OG0001343	Fumarylacetoacetate (FAA) hydrolase family		-
			-	OG0001690	-		-		-	OG0001357	-		-
			-	OG0002777	PFAM Peptidoglycan-binding domain 1 protein		-		-	OG0001358	-		-
			-	OG0002835	Oligosaccharyl transferase STT3 subunit		-		-	OG0001359	NYN domain		-
			-	OG0002841	FemAB family		-		-	OG0001360	-		-
			-	OG0002915	protein involved in cytokinesis, contains TGc (transglutaminase protease-like) domain		-		-	OG0001420	-		-
			-	OG0002923	Transcriptional regulator		-		-	OG0001436	MotA/TolQ/ExbB proton channel family		-
			-	OG0002950	Glycosyl hydrolases family 2, TIM barrel domain		-		-	OG0001438	Sodium:solute symporter family		-
			-	OG0002982	prohibitin homologues		-		-	OG0001445	PFAM periplasmic binding protein		-
			-	OG0003000	-		-		-	OG0001463	-		-
			-	OG0003041	Glycosyl transferase 4-like		-		-	OG0001481	-		-
			-	OG0003098	-		-		-	OG0001529	Protein of unknown function (DUF433)		-
			-	OG0003136	-		-		-	OG0001531	Domain of unknown function (DUF366)		-
			-	OG0001965	-		-		-	OG0001545	Belongs to the GbsR family		-
			-	OG0002092	-		-		-	OG0001569	Predicted transporter (DUF2162)		-
			-	OG0002176	Phage integrase family		-		-	OG0001599	integral membrane protein		-
			-	OG0002405	-		-		-	OG0001602	TPR repeat		-
			-	OG0002450	-		-		-	OG0001627	TatD related DNase		-
			-	OG0002495	-		-		-	OG0001632	-		-
			-	OG0002533	CopG antitoxin of type II toxin-antitoxin system		-		-	OG0001673	S4 RNA-binding domain		-
			-	OG0002567	EamA-like transporter family		-		-	OG0001720	Acetyltransferase (GNAT) domain		-
			-	OG0002583	-		-		-	OG0001762	DRTGG domain		-
			-	OG0002621	-		-		-	OG0001770	HD domain		-
			-	OG0002649	-		-		-	OG0001780	TIGRFAM CRISPR-associated protein Cas4		-
			-	OG0002669	Transcriptional regulator		-		-	OG0001790	-		-
			-	OG0002694	Phosphate-starvation-inducible E		-		-	OG0001807	Leucyl aminopeptidase (Aminopeptidase t)		-
			-	OG0002773	hydrolase activity, acting on ester bonds		-		-	OG0001846	DNA-dependent DNA replication		-
			-	OG0002817	-		-		-	OG0001893	Type III restriction enzyme res subunit		-
			-	OG0002848	-		-		-	OG0001911	Oxidoreductase FAD-binding domain		-
			-	OG0002876	calcium- and calmodulin-responsive adenylate cyclase activity		-		-	OG0001914	ATPase associated with various cellular activities, AAA_5		-
			-	OG0002924	-		-		-	OG0001973	Belongs to the HMG-CoA reductase family		-
			-	OG0002961	-		-		-	OG0002006	oxidoreductase activity, acting on the aldehyde or oxo group of donors, disulfide as acceptor		-
			-	OG0002963	-		-		-	OG0002008	ASCH		-
			-	OG0002967	-		-		-	OG0002019	-		-
			-	OG0002977	-		-		-	OG0002032	Uncharacterised protein family (UPF0014)		-
			-	OG0002983	Required for insertion of 4Fe-4S clusters		-		-	OG0002052	PFAM transposase, IS4 family protein		-
			-	OG0002986	-		-		-	OG0002075	PFAM Integrase core domain		-
			-	OG0003013	Sodium:dicarboxylate symporter family		-		-	OG0002121	-		-
			-	OG0003022	4Fe-4S single cluster domain of Ferredoxin I		-		-	OG0002130	DNA methylase		-
			-	OG0003023	Glycosyl transferase, family 2		-		-	OG0002139	MazG nucleotide pyrophosphohydrolase domain		-
			-	OG0003037	-		-		-	OG0002141	Ribbon-helix-helix protein, copG family		-
			-	OG0003079	methyltransferase activity		-		-	OG0002181	DDE superfamily endonuclease		-
			-	OG0003099	Part of a complex that catalyzes the reversible cleavage of acetyl-CoA, allowing		-		-	OG0002186	PFAM Aminotransferase class I and II		-
			-	OG0003100	Domain of unknown function DUF302		-		-	OG0002195	-		-
			-	OG0003132	-		-		-	OG0002204	Transcriptional regulator, AbiEi antitoxin		-
			-	OG0003155	-		-		-	OG0002217	Cytochrome b subunit of formate		-
			-	OG0003156	radical SAM domain protein		-		-	OG0002220	AAA domain (dynein-related subfamily)		-
			-	OG0003166	-		-		-	OG0002228	Transmembrane exosortase (Exosortase_EpsH)		-
			-	OG0003167	nuclear chromosome segregation		-		-	OG0002248	glycosyl transferase group 1		-
			-	OG0003170	-		-		-	OG0002250	Iron hydrogenase small subunit		-
			-	OG0003172	FxsA cytoplasmic membrane protein		-		-	OG0002252	-		-
			-	OG0003174	Peptidase family U32		-		-	OG0002256	Transcriptional		-
			-	OG0003177	-		-		-	OG0002262	PFAM Transposase		-
			-	OG0003180	Zn-dependent protease with chaperone function		-		-	OG0002281	-		-
			-	OG0003202	Archaebacterial flagellin		-		-	OG0002288	COG3385 FOG Transposase and inactivated derivatives		-
			-	OG0003207	-		-		-	OG0002296	Catalyzes the cyclization of 5-formylamidoimidazole-4- carboxamide ribonucleotide to IMP		-
			-	OG0003209	-		-		-	OG0002299	Domain of unknown function (DUF378)		-
			-	OG0003213	Cleaves both 3' and 5' ssDNA extremities of branched DNA structures		-		-	OG0002301	-		-
			-	OG0003217	Methyladenine glycosylase		-		-	OG0002340	Protein of unknown function DUF262		-
			-	OG0003226	-		-		-	OG0002343	-		-
			-	OG0003227	-		-		-	OG0002348	Toxic component of a toxin-antitoxin (TA) module. An RNase		-
			-	OG0003228	Integral membrane protein TerC family		-		-	OG0002385	Protein of unknown function (DUF1232)		-
			-	OG0003229	-		-		-	OG0002395	AAA ATPase domain		-
			-	OG0003232	-		-		-	OG0002435	-		-
			-	OG0003233	-		-		-	OG0002448	DNA alkylation repair enzyme		-
			-	OG0003234	-		-		-	OG0002456	Protein of unknown function DUF262		-
			-	OG0003241	-		-		-	OG0002468	-		-
			-	OG0003242	-		-		-	OG0002469	Sulfatase		-
			-	OG0003268	Domain of unknown function (DUF1508)		-		-	OG0002470	NiFe/NiFeSe hydrogenase small subunit C-terminal		-
			-	OG0003284	alpha amylase catalytic		-		-	OG0002472	Sodium:alanine symporter family		-
			-	OG0003287	Catalyzes the formation of acetyl phosphate from acetate and ATP. Can also catalyze the reverse reaction		-		-	OG0002473	Concanavalin A-like lectin/glucanases superfamily		-
			-	OG0003321	LUD domain		-		-	OG0002479	-		-
			-	OG0003330	Electron transfer flavoprotein domain		-		-	OG0002481	-		-
			-	OG0003332	-		-		-	OG0002482	glycosyl transferase family 2		-
			-	OG0003333	-		-		-	OG0002491	Protein of unknown function (DUF3147)		-
			-	OG0003335	-		-		-	OG0002501	PFAM Aminotransferase class I and II		-
			-	OG0003337	-		-		-	OG0002547	-		-
			-	OG0003359	-		-		-	OG0002563	McrBC 5-methylcytosine restriction system component		-
			-	OG0003362	-		-		-	OG0002572	Peptidase_C39 like family		-
			-	OG0003363	-		-		-	OG0002573	amino acid		-
			-	OG0003368	-		-		-	OG0002574	-		-
			-	OG0003374	-		-		-	OG0002616	Protein of unknown function (DUF1269)		-
			-	OG0000530	Belongs to the NiFe NiFeSe hydrogenase large subunit family		-		-	OG0002617	Hemerythrin HHE cation binding domain		-
			-	OG0000033	Domain of unknown function (DUF3821)		-		-	OG0002630	-		-
			-	OG0001401	Oxidoreductase		-		-	OG0002643	DNA integration		-
			-	OG0001456	Chemotaxis signal transduction system protein F from archaea		-		-	OG0002644	Tex-like protein N-terminal domain		-
			-	OG0001462	COG0467 RecA-superfamily ATPases implicated in signal transduction		-		-	OG0002652	-		-
			-	OG0001305	Archaebacterial flagellin		-		-	OG0002672	-		-
			-	OG0001306	-		-		-	OG0002675	type I restriction modification DNA specificity domain		-
			-	OG0001473	PFAM D12 class N6 adenine-specific DNA methyltransferase		-		-	OG0002685	Formamidopyrimidine-DNA glycosylase H2TH domain		-
			-	OG0001616	Molybdate transporter of MFS superfamily		-		-	OG0002686	Nucleotidyltransferase domain		-
			-	OG0000613	PFAM NHL repeat containing protein		-		-	OG0002706	-		-
			-	OG0001023	COG1680 Beta-lactamase class C and other penicillin binding proteins		-		-	OG0002759	COG3209 Rhs family protein		-
			-	OG0001460	-		-		-	OG0002768	-		-
			-	OG0001525	PFAM phospholipase D Transphosphatidylase		-		-	OG0002770	Xylose isomerase-like TIM barrel		-
			-	OG0001714	Uracil DNA glycosylase superfamily		-		-	OG0002781	-		-
			-	OG0001300	Acetyltransferase (GNAT) domain		-		-	OG0002783	Protein of unknown function (DUF3800)		-
			-	OG0001422	-		-		-	OG0002789	double-stranded DNA endodeoxyribonuclease activity		-
			-	OG0001629	Phosphohydrolase-associated domain		-		-	OG0002791	-		-
			-	OG0001637	NADPH-dependent FMN reductase		-		-	OG0002795	CRISPR-associated protein (Cas_Cas02710)		-
			-	OG0001427	Polyphosphate kinase 2 (PPK2)		-		-	OG0002850	PFAM UDP-N-acetylglucosamine 2-epimerase		-
			-	OG0001491	COG2133 Glucose sorbosone dehydrogenases		-		-	OG0002851	-		-
			-	OG0001555	PFAM Iron-containing alcohol dehydrogenase		-		-	OG0002893	-		-
			-	OG0001733	Domain of unknown function (DUF362)		-		-	OG0002901	bacterial-type RNA polymerase transcriptional activator activity, sequence-specific DNA binding		-
			-	OG0001395	PFAM Substrate-binding region of ABC-type glycine betaine transport system		-		-	OG0002904	PFAM peptidase		-
			-	OG0001399	-		-		-	OG0002907	In addition to polymerase activity, this DNA polymerase exhibits 5'-3' exonuclease activity		-
			-	OG0001929	Domain in cystathionine beta-synthase and other proteins.		-		-	OG0002920	-		-
			-	OG0002027	Glyoxalase-like domain		-		-	OG0002922	PFAM Uncharacterised protein family UPF0150		-
			-	OG0002099	Endonuclease related to archaeal Holliday junction resolvase		-		-	OG0002935	Toxic component of a toxin-antitoxin (TA) module. An RNase		-
			-	OG0001482	-		-		-	OG0002946	-		-
			-	OG0001754	Activator of Hsp90 ATPase		-		-	OG0002951	Belongs to the TPP enzyme family		-
			-	OG0001791	Predicted membrane protein (DUF2206)		-		-	OG0002997	Histidine kinase-, DNA gyrase B-, and HSP90-like ATPase		-
			-	OG0001975	-		-		-	OG0003003	-		-
			-	OG0001238	to orf2, orf11, orf12, orf13, orf14, orf15 of fosmid clone 4B7mr3		-		-	OG0003017	Transglutaminase-like superfamily		-
			-	OG0001920	Protein of unknown function (DUF3006)		-		-	OG0003018	-		-
			-	OG0001927	C-5 cytosine-specific DNA methylase		-		-	OG0003035	AhpC/TSA family		-
			-	OG0002007	-		-		-	OG0003040	TIGRFAM CRISPR-associated protein Cas4		-
			-	OG0002077	deoxyhypusine monooxygenase activity		-		-	OG0003058	-		-
			-	OG0002147	OST-HTH/LOTUS domain		-		-	OG0003063	Protein of unknown function (DUF1700)		-
			-	OG0002169	Protein of unknown function (DUF998)		-		-	OG0003086	AAA ATPase domain		-
			-	OG0002194	4-alpha-glucanotransferase		-		-	OG0003114	PFAM Glucose-methanol-choline oxidoreductase, N-terminal		-
			-	OG0001524	Protein of unknown function (DUF1538)		-		-	OG0003115	-		-
			-	OG0002073	Protein of unknown function (DUF3795)		-		-	OG0003121	-		-
			-	OG0002173	Nitrogen regulatory protein P-II		-		-	OG0003142	-		-
			-	OG0002275	family UPF0029		-		-	OG0003146	Protein of unknown function (DUF1003)		-
			-	OG0001834	PFAM Stigma-specific protein, Stig1		-		-	OG0003159	Cephalosporin hydroxylase		-
			-	OG0002162	Acyltransferase family		-		-	OG0003183	FAD dependent oxidoreductase		-
			-	OG0002295	Bacterio-opsin activator HTH		-		-	OG0003186	-		-
			-	OG0002425	NOG31153 non supervised orthologous group		-		-	OG0003187	Protein of unknown function (DUF3795)		-
			-	OG0002436	-		-		-	OG0003189	membrane		-
			-	OG0001826	PFAM glycosyl transferase group 1		-		-	OG0003190	CsbD-like		-
			-	OG0002053	TIGRFAM N-acetyl sugar amidotransferase		-		-	OG0003196	Catalyzes the ATP-dependent phosphorylation of L- homoserine to L-homoserine phosphate		-
			-	OG0002214	-		-		-	OG0003201	WbqC-like protein family		-
			-	OG0002283	Permease family		-		-	OG0003205	Protein of unknown function (DUF559)		-
			-	OG0002305	TfoX N-terminal domain		-		-	OG0003224	Alpha/beta hydrolase family		-
			-	OG0002325	PFAM CRISPR-associated protein TM1801		-		-	OG0003249	-		-
			-	OG0002334	Catalyzes the irreversible beta-carboxylation of phosphoenolpyruvate (PEP) to form oxaloacetate (OAA), a four- carbon dicarboxylic acid source for the tricarboxylic acid cycle		-		-	OG0003250	-		-
			-	OG0002344	PFAM Uncharacterised protein family UPF0150		-		-	OG0003257	Peptidase family M28		-
			-	OG0001968	PFAM RNA-metabolising metallo-beta-lactamase		-		-	OG0003260	DNA integration		-
			-	OG0002107	Aminotransferase class-III		-		-	OG0003263	-		-
			-	OG0002146	deoxyribonuclease I		-		-	OG0003269	-		-
			-	OG0002267	-		-		-	OG0003298	zinc finger		-
			-	OG0002465	Type I restriction enzyme R protein N terminus (HSDR_N)		-		-	OG0003299	-		-
			-	OG0002500	Hydrogenase 4 membrane		-		-	OG0003320	-		-
			-	OG0002612	COG0210 Superfamily I DNA and RNA helicases		-		-	OG0003348	-		-
			-	OG0002642	Protein of unknown function (DUF2961)		-		-	OG0003384	-		-
			-	OG0001420	-		-		-	OG0003415	Protein of unknown function (DUF2797)		-
			-	OG0001893	Type III restriction enzyme res subunit		-		-	OG0003422	Cytotoxic translational repressor of toxin-antitoxin stability system		-
			-	OG0002075	PFAM Integrase core domain		-		-	OG0003427	membrane		-
			-	OG0002204	Transcriptional regulator, AbiEi antitoxin		-		-	OG0003428	hydrolases or acyltransferases (alpha beta hydrolase superfamily)		-
			-	OG0002343	-		-		-	OG0003432	6-phosphogluconate dehydrogenase-like protein		-
			-	OG0002395	AAA ATPase domain		-		-	OG0003433	-		-
			-	OG0002469	Sulfatase		-		-	OG0003436	Membrane protein involved in the export of O-antigen and teichoic acid		-
			-	OG0002470	NiFe/NiFeSe hydrogenase small subunit C-terminal		-		-	OG0003440	membrane		-
			-	OG0002472	Sodium:alanine symporter family		-		-	OG0003441	4Fe-4S binding domain		-
			-	OG0002501	PFAM Aminotransferase class I and II		-		-	OG0003444	phosphoglycerate mutase		-
			-	OG0002547	-		-		-	OG0003457	-		-
			-	OG0002672	-		-		-	OG0003460	CRISPR-associated protein Cse2 (CRISPR_cse2)		-
			-	OG0002675	type I restriction modification DNA specificity domain		-		-	OG0003482	Saccharopine dehydrogenase C-terminal domain		-
			-	OG0002706	-		-		-	OG0003487	HNH nucleases		-
			-	OG0001766	cellulosome anchoring protein cohesin region		-		-	OG0003498	-		-
			-	OG0002108	S-layer homology domain		-		-	OG0003499	zinc-ribbon domain		-
			-	OG0002346	Astacin (Peptidase family M12A)		-		-	OG0003506	Protein of unknown function (DUF998)		-
			-	OG0002366	CRISPR-associated endoribonuclease Cas6		-		-	OG0003510	-		-
			-	OG0002531	-		-		-	OG0003513	-		-
			-	OG0002615	Catalyzes the hydrolysis of inorganic pyrophosphate (PPi) forming two phosphate ions		-		-	OG0003518	GDP-mannose 4,6 dehydratase		-
			-	OG0002696	-		-		-	OG0003553	-		-
			-	OG0002802	-		-		-	OG0003556	SET (Su(var)3-9, Enhancer-of-zeste, Trithorax) domain		-
			-	OG0002847	AAA domain		-		-	OG0003562	Acetyltransferase (GNAT) domain		-
			-	OG0002854	FAD binding domain of DNA photolyase		-		-	OG0003564	-		-
			-	OG0002926	-		-		-	OG0003567	-		-
			-	OG0002304	-		-		-	OG0003571	-		-
			-	OG0002338	Glycosyltransferase Family 4		-		-	OG0003577	PFAM PKD domain containing protein		-
			-	OG0002359	TIGRFAM CRISPR-associated protein Csx11		-		-	OG0003581	-		-
			-	OG0002380	Transposase		-		-	OG0003585	Dihydroorotate dehydrogenase		-
			-	OG0002510	Membrane protein involved in the export of O-antigen and teichoic acid		-		-	OG0003590	cAMP biosynthetic process		-
			-	OG0002551	von Willebrand factor (vWF) type A domain		-		-	OG0003617	5'-deoxynucleotidase activity		-
			-	OG0002662	Domain of unknown function (DUF4411)		-		-	OG0003623	DNA polymerase beta		-
			-	OG0002794	-		-		-	OG0003628	COG0788 Formyltetrahydrofolate hydrolase		-
			-	OG0002815	-		-		-	OG0003662	-		-
			-	OG0002824	response to heat		-		-	OG0003708	Dolichyl-phosphate-mannose-protein mannosyltransferase		-
			-	OG0002827	-		-		-	OG0003714	PFAM transcriptional regulator PadR family protein		-
			-	OG0002846	CRISPR-associated protein Cas4		-		-	OG0003723	-		-
			-	OG0002873	AAA superfamily		-		-	OG0003725	-		-
			-	OG0002905	3-demethylubiquinone-9 3-methyltransferase		-		-	OG0003732	-		-
			-	OG0002970	-		-		-	OG0003772	COG0683 ABC-type branched-chain amino acid transport systems, periplasmic component		-
			-	OG0002985	DsrE/DsrF-like family		-		-	OG0003774	Acyl-CoA reductase (LuxC)		-
			-	OG0003010	-		-		-	OG0003784	-		-
			-	OG0003031	Putative zinc- or iron-chelating domain		-		-	OG0003787	Hydrolyzes cAMP to 5'-AMP. Plays an important regulatory role in modulating the intracellular concentration of cAMP, thereby influencing cAMP-dependent processes		-
			-	OG0001302	IS1 transposase		-		-	OG0003790	-		-
			-	OG0002196	-		-		-	OG0003792	-		-
			-	OG0002326	-		-		-	OG0003794	-		-
			-	OG0002351	-		-		-	OG0003796	DNA N-6-adenine-methyltransferase (Dam)		-
			-	OG0002819	-		-		-	OG0003836	-		-
			-	OG0002823	Cytochrome c bacterial		-		-	OG0003842	D-alanyl-D-alanine carboxypeptidase		-
			-	OG0002828	-		-		-	OG0003854	-		-
			-	OG0002945	Uncharacterized conserved protein (DUF2299)		-		-	OG0003859	-		-
			-	OG0003097	-		-		-	OG0003860	-		-
			-	OG0003191	Ferritin-like domain		-		-	OG0003861	metallopeptidase activity		-
			-	OG0003278	head morphogenesis protein, SPP1 gp7		-		-	OG0003865	-		-
			-	OG0003280	Pyruvate phosphate dikinase, PEP/pyruvate binding domain		-		-	OG0003866	-		-
			-	OG0003294	-		-		-	OG0003870	-		-
			-	OG0003331	Serine Threonine protein kinase		-		-	OG0003872	Adenylyl- / guanylyl cyclase, catalytic domain		-
			-	OG0003386	-		-		-	OG0003875	-		-
			-	OG0002238	-		-		-	OG0003876	dolichyl-phosphate-mannose-glycolipid alpha-mannosyltransferase activity		-
			-	OG0002263	-		-		-	OG0003885	Glycosyl transferases group 1		-
			-	OG0002265	-		-		-	OG0003899	-		-
			-	OG0002266	-		-		-	OG0003915	Transglutaminase-like		-
			-	OG0002350	-		-		-	OG0003918	transferase activity, transferring glycosyl groups		-
			-	OG0002375	COG1002 Type II restriction enzyme, methylase subunits		-		-	OG0003921	Phosphoenolpyruvate carboxykinase		-
			-	OG0002446	PFAM Transposase DDE domain		-		-	OG0003933	-		-
			-	OG0002668	Domain of unknown function (DUF4139)		-		-	OG0003938	Threonine/Serine exporter, ThrE		-
			-	OG0002806	SEC-C motif		-		-	OG0003984	exodeoxyribonuclease I activity		-
			-	OG0002808	PFAM Polysulphide reductase, NrfD		-		-	OG0003987	Bacterial membrane protein, YfhO		-
			-	OG0002862	-		-		-	OG0004005	-		-
			-	OG0002864	-		-		-	OG0004006	-		-
			-	OG0002871	-		-		-	OG0004008	Transaldolase is important for the balance of metabolites in the pentose-phosphate pathway		-
			-	OG0002880	-		-		-	OG0004015	Periplasmic copper-binding protein (NosD)		-
			-	OG0002941	Thioredoxin		-		-	OG0004051	Protein of unknown function with HXXEE motif		-
			-	OG0002975	LexA-binding, inner membrane-associated putative hydrolase		-		-	OG0004063	-		-
			-	OG0002981	Sulfatase-modifying factor enzyme 1		-		-	OG0004070	Formate hydrogenlyase subunit 6 NADH ubiquinone oxidoreductase 23 kD subunit (chain I)		-
			-	OG0003032	-		-		-	OG0004071	heterodisulfide reductase subunit C		-
			-	OG0003077	Protein of unknown function (DUF1059)		-		-	OG0004073	Catalyzes a reversible aldol reaction between acetaldehyde and D-glyceraldehyde 3-phosphate to generate 2-deoxy- D-ribose 5-phosphate		-
			-	OG0003078	Uroporphyrinogen decarboxylase (URO-D)		-		-	OG0004074	4-hydroxybenzoate synthetase (chorismate lyase)		-
			-	OG0003081	-		-		-	OG0004079	-		-
			-	OG0003131	Major facilitator superfamily		-		-	OG0004123	-		-
			-	OG0003145	protocatechuate 3,4-dioxygenase activity		-		-	OG0004129	2'-5' RNA ligase superfamily		-
			-	OG0003150	Protein of unknown function (DUF3485)		-		-	OG0004131	PFAM alanine dehydrogenase PNT domain protein		-
			-	OG0003157	Protein of unknown function with PCYCGC motif		-		-	OG0004132	4TM region of pyridine nucleotide transhydrogenase, mitoch		-
			-	OG0003179	-		-		-	OG0004133	PFAM NAD(P) transhydrogenase, beta subunit		-
			-	OG0003211	Cytochrome c554 and c-prime		-		-	OG0004134	-		-
			-	OG0003212	-		-		-	OG0004137	-		-
			-	OG0003225	-		-		-	OG0004141	Aromatic acid exporter family member 1		-
			-	OG0003231	-		-		-	OG0004143	NAD(P)H-dependent FMN reductase		-
			-	OG0003270	Putative small multi-drug export protein		-		-	OG0004145	methyltransferase		-
			-	OG0003271	Sulfite exporter TauE/SafE		-		-	OG0004150	Necessary for normal cell division and for the maintenance of normal septation		-
			-	OG0003274	-		-		-	OG0004158	-		-
			-	OG0003279	AzlC protein		-		-	OG0004160	-		-
			-	OG0003282	-		-		-	OG0004162	-		-
			-	OG0003289	Di-haem cytochrome c peroxidase		-		-	OG0004163	Transcriptional regulator		-
			-	OG0003324	Belongs to the UbiD family		-		-	OG0004164	-		-
			-	OG0003325	EamA-like transporter family		-		-	OG0004173	Methyl-accepting chemotaxis-like domains (chemotaxis sensory transducer).		-
			-	OG0003327	Histidine kinase		-		-	OG0004259	-		-
			-	OG0003334	acetyltransferase		-		-	OG0004263	C-terminal domain of histone		-
			-	OG0003352	PFAM periplasmic copper-binding		-		-	OG0004264	-		-
			-	OG0003369	UbiA prenyltransferase family		-		-	OG0004266	-		-
			-	OG0003371	Catalyzes the reduction of nitrite to ammonia, consuming six electrons in the process		-		-	OG0004268	CRISPR-associated protein Cas5		-
			-	OG0003376	DsrE/DsrF-like family		-		-	OG0004269	Protein of unknown function (DUF2997)		-
			-	OG0003392	-		-		-	OG0004270	ATPase family associated with various cellular activities (AAA)		-
			-	OG0003394	HEPN domain		-		-	OG0004274	-		-
			-	OG0003402	-		-		-	OG0004276	membrane protein (DUF2178)		-
			-	OG0003404	-		-		-	OG0004282	-		-
			-	OG0003405	-		-		-	OG0004283	-		-
			-	OG0003409	PFAM Phage late control gene D protein (GPD)		-		-	OG0004284	-		-
			-	OG0003410	-		-		-	OG0004286	-		-
			-	OG0003446	dipeptide transport		-		-	OG0004287	-		-
			-	OG0003447	-		-		-	OG0004288	UDP-glucose:hexose-1-phosphate uridylyltransferase activity		-
			-	OG0003448	-		-		-	OG0004289	-		-
			-	OG0003450	Cytidylyltransferase-like		-		-	OG0004293	-		-
			-	OG0003452	Inorganic pyrophosphatase		-		-	OG0004295	PFAM Glycosyl transferase, group 1		-
			-	OG0003454	Membrane protein involved in the export of O-antigen and teichoic acid		-		-	OG0004296	CDP-Glycerol:Poly(glycerophosphate) glycerophosphotransferase		-
			-	OG0003456	nucleoside-triphosphate diphosphatase activity		-		-	OG0004297	-		-
			-	OG0003458	Nicotinic acid phosphoribosyltransferase		-		-	OG0004298	-		-
			-	OG0003459	Peptidase M1 membrane alanine aminopeptidase		-		-	OG0004368	TerB N-terminal domain		-
			-	OG0003461	-		-		-	OG0004373	-		-
			-	OG0003464	PFAM Chemotaxis signal transduction system protein F from archaea		-		-	OG0004374	-		-
			-	OG0003465	-		-		-	OG0004377	Tellurite resistance protein TerB		-
			-	OG0003466	-		-		-	OG0004378	-		-
			-	OG0003467	-		-		-	OG0004448	membrane		-
			-	OG0003470	-		-		-	OG0004452	-		-
			-	OG0003471	-		-		-	OG0004465	Protein of unknown function (DUF1579)		-
			-	OG0003473	Methyltransferase involved in ribosomal biogenesis. Specifically catalyzes the N1-methylation of the pseudouridine corresponding to position 914 in M.jannaschii 16S rRNA		-		-	OG0004484	-		-
			-	OG0003479	-		-		-	OG0004495	-		-
			-	OG0003546	Protein of unknown function (DUF2683)		-		-	OG0004505	Protein of unknown function with HXXEE motif		-
			-	OG0003549	peroxiredoxin activity		-		-	OG0000364	Uroporphyrinogen decarboxylase (URO-D)		-
			-	OG0003596	Polyketide cyclase dehydrase		-		-	OG0000930	low-complexity proteins		-
			-	OG0003601	-		-		-	OG0000984	Transposase IS200 like		-
			-	OG0003605	-		-		-	OG0001033	Staphylococcal nuclease homologue		-
			-	OG0003641	heme binding		-		-	OG0001102	ADP-specific Phosphofructokinase/Glucokinase conserved region		-
			-	OG0003644	Transmembrane exosortase (Exosortase_EpsH)		-		-	OG0001131	Belongs to the acylphosphatase family		-
			-	OG0003646	-		-		-	OG0001157	Acetyltransferase (GNAT) domain		-
			-	OG0003647	-		-		-	OG0001182	-		-
			-	OG0003648	DsrE/DsrF-like family		-		-	OG0001225	-		-
			-	OG0003649	DsrE/DsrF-like family		-		-	OG0001287	Protein of unknown function (DUF1246)		-
			-	OG0003650	DsrH like protein		-		-	OG0001289	Type I phosphodiesterase / nucleotide pyrophosphatase		-
			-	OG0003651	-		-		-	OG0001336	PFAM regulatory protein, ArsR		-
			-	OG0003654	Protein of unknown function (DUF1699)		-		-	OG0001344	NADH-ubiquinone/plastoquinone oxidoreductase chain 4L		-
			-	OG0001004	coenzyme F420-reducing hydrogenase, delta subunit		-		-	OG0001355	Mo-molybdopterin cofactor metabolic process		-
			-	OG0001345	PFAM Radical SAM domain protein		-		-	OG0001425	PFAM Acetyl-CoA hydrolase transferase		-
			-	OG0001397	Catalyzes the condensation of 4-aminobenzoate (pABA) with 5-phospho-alpha-D-ribose 1-diphosphate (PRPP) to produce beta-ribofuranosylaminobenzene 5'-phosphate (beta-RFA-P)		-		-	OG0001437	GTPase that associates with the 50S ribosomal subunit and may have a role during protein synthesis or ribosome biogenesis		-
			-	OG0001400	COG1502 Phosphatidylserine phosphatidylglycerophosphate cardiolipi n synthases and related enzymes		-		-	OG0001464	to GB L77117 SP Q57808 PID 1499149 percent identity		-
			-	OG0000958	Short repeat of unknown function (DUF308)		-		-	OG0001598	-		-
			-	OG0001538	Mitochondrial small ribosomal subunit Rsm22		-		-	OG0001611	FAD binding domain		-
			-	OG0001550	Anaerobic ribonucleoside-triphosphate reductase		-		-	OG0001636	Galactose-1-phosphate uridyl transferase, N-terminal domain		-
			-	OG0001449	-		-		-	OG0001665	COG3436 Transposase and inactivated derivatives		-
			-	OG0001455	Archaeal flagellar protein F		-		-	OG0001695	Type I phosphodiesterase / nucleotide pyrophosphatase		-
			-	OG0001506	PFAM ribonuclease II		-		-	OG0001713	DNA integration		-
			-	OG0001163	Amino acid ABC transporter substrate-binding protein, PAAT family		-		-	OG0001739	Thioredoxin domain		-
			-	OG0001477	-		-		-	OG0001766	cellulosome anchoring protein cohesin region		-
			-	OG0001634	Ferredoxin		-		-	OG0001799	Protein of unknown function (DUF531)		-
			-	OG0001168	PFAM Histidine kinase-, DNA gyrase B-, and HSP90-like ATPase		-		-	OG0001812	protein conserved in archaea		-
			-	OG0001787	Protein of unknown function (DUF475)		-		-	OG0001813	membrane		-
			-	OG0001428	COG0737 5'-nucleotidase 2',3'-cyclic phosphodiesterase and related esterases		-		-	OG0001825	FmdE, Molybdenum formylmethanofuran dehydrogenase operon		-
			-	OG0001523	PFAM Beta propeller domain		-		-	OG0001828	PFAM Sulfate transporter antisigma-factor antagonist STAS		-
			-	OG0001674	-		-		-	OG0001850	Protein of unknown function (DUF2892)		-
			-	OG0001734	Protein of unknown function (DUF1328)		-		-	OG0001853	Belongs to the Protein of		-
			-	OG0000273	-		-		-	OG0001862	Cys/Met metabolism PLP-dependent enzyme		-
			-	OG0001364	DNA polymerase beta		-		-	OG0001869	RibD C-terminal domain		-
			-	OG0001750	Domain of unknown function (DUF4405)		-		-	OG0001891	Protein of unknown function (DUF2283)		-
			-	OG0001866	NADPH-dependent FMN reductase		-		-	OG0001918	Adenylylsulphate kinase		-
			-	OG0001607	SpoIIAA-like		-		-	OG0001943	Type III restriction enzyme, res subunit		-
			-	OG0001988	Anion transporter		-		-	OG0002003	DNA methylase		-
			-	OG0002028	-		-		-	OG0002004	von willebrand factor, type A		-
			-	OG0001804	Zinc-uptake complex component A periplasmic		-		-	OG0002030	DNA polymerase type-B family		-
			-	OG0002098	-		-		-	OG0002038	Belongs to the carbohydrate kinase PfkB family. LacC subfamily		-
			-	OG0001922	-		-		-	OG0002039	Amidohydrolase		-
			-	OG0001926	-		-		-	OG0002045	-		-
			-	OG0001334	Subtilase family		-		-	OG0002059	Toxic component of a toxin-antitoxin (TA) module. An RNase		-
			-	OG0001837	COG1541 Coenzyme F390 synthetase		-		-	OG0002061	S-layer homology domain		-
			-	OG0001961	-		-		-	OG0002078	PFAM beta-lactamase domain protein		-
			-	OG0002140	Aldo/keto reductase family		-		-	OG0002088	Resolvase, N terminal domain		-
			-	OG0001924	PFAM SOUL heme-binding protein		-		-	OG0002108	S-layer homology domain		-
			-	OG0002043	-		-		-	OG0002122	Protein of unknown function (DUF1673)		-
			-	OG0002174	GYD domain		-		-	OG0002135	Regulator of chromosome condensation (RCC1) repeat		-
			-	OG0002291	-		-		-	OG0002138	Hemerythrin HHE cation binding domain		-
			-	OG0001841	-		-		-	OG0002175	-		-
			-	OG0002167	-		-		-	OG0002178	-		-
			-	OG0002297	Catalyzes the two-step NADP-dependent conversion of GDP- 4-dehydro-6-deoxy-D-mannose to GDP-fucose, involving an epimerase and a reductase reaction		-		-	OG0002180	Terminase RNaseH-like domain		-
			-	OG0002051	COG2133 Glucose sorbosone dehydrogenases		-		-	OG0002221	TIGRFAM CRISPR-associated protein Cas5		-
			-	OG0002170	ATP-grasp domain		-		-	OG0002274	Nucleotidyltransferase substrate binding protein like		-
			-	OG0002246	2-hydroxyglutaryl-CoA dehydratase, D-component		-		-	OG0002345	mRNA binding		-
			-	OG0002278	Nucleotidyl transferase		-		-	OG0002346	Astacin (Peptidase family M12A)		-
			-	OG0002337	ChaB		-		-	OG0002362	-		-
			-	OG0001368	Lactonase, 7-bladed beta-propeller		-		-	OG0002365	PFAM Phage-related baseplate assembly protein		-
			-	OG0002412	PFAM Linocin_M18 bacteriocin protein		-		-	OG0002366	CRISPR-associated endoribonuclease Cas6		-
			-	OG0002423	-		-		-	OG0002381	Part of the twin-arginine translocation (Tat) system that transports large folded proteins containing a characteristic twin-arginine motif in their signal peptide across membranes		-
			-	OG0002453	-		-		-	OG0002383	AAA domain (dynein-related subfamily)		-
			-	OG0002478	TIGRFAM CDP-glucose 4,6-dehydratase		-		-	OG0002387	Part of the twin-arginine translocation (Tat) system that transports large folded proteins containing a characteristic twin-arginine motif in their signal peptide across membranes		-
			-	OG0002400	AAA ATPase domain		-		-	OG0002419	COG1045 Serine acetyltransferase		-
			-	OG0002420	AIPR protein		-		-	OG0002430	Peptidase C39 family		-
			-	OG0002506	COG1361 S-layer domain		-		-	OG0002443	COG1361 S-layer domain		-
			-	OG0002511	MazF family transcriptional regulator		-		-	OG0002445	ATPase, AAA superfamily		-
			-	OG0002676	CorA-like Mg2+ transporter protein		-		-	OG0002447	Domain of unknown function (DUF4386)		-
			-	OG0002679	S-adenosylmethionine synthetase, C-terminal domain		-		-	OG0002494	Kelch motif		-
			-	OG0002688	RmuC family		-		-	OG0002497	TIGRFAM CRISPR-associated RAMP protein, Cmr4 family		-
			-	OG0002741	Catalytic LigB subunit of aromatic ring-opening dioxygenase		-		-	OG0002509	Nitrous oxidase accessory protein		-
			-	OG0000960	COG3385 FOG Transposase and inactivated derivatives		-		-	OG0002512	Erythromycin esterase		-
			-	OG0001445	PFAM periplasmic binding protein		-		-	OG0002513	Protein conserved in bacteria		-
			-	OG0002052	PFAM transposase, IS4 family protein		-		-	OG0002514	TIGRFAM CRISPR-associated protein Csm1		-
			-	OG0002248	glycosyl transferase group 1		-		-	OG0002531	-		-
			-	OG0002348	Toxic component of a toxin-antitoxin (TA) module. An RNase		-		-	OG0002543	IrrE N-terminal-like domain		-
			-	OG0002448	DNA alkylation repair enzyme		-		-	OG0002548	N-terminal domain of (some) glycogen debranching enzymes		-
			-	OG0002468	-		-		-	OG0002550	-		-
			-	OG0002482	glycosyl transferase family 2		-		-	OG0002615	Catalyzes the hydrolysis of inorganic pyrophosphate (PPi) forming two phosphate ions		-
			-	OG0002563	McrBC 5-methylcytosine restriction system component		-		-	OG0002629	-		-
			-	OG0002630	-		-		-	OG0002645	-		-
			-	OG0002685	Formamidopyrimidine-DNA glycosylase H2TH domain		-		-	OG0002655	Large family of predicted nucleotide-binding domains		-
			-	OG0002686	Nucleotidyltransferase domain		-		-	OG0002689	PFAM DNA methylase N-4 N-6		-
			-	OG0002759	COG3209 Rhs family protein		-		-	OG0002696	-		-
			-	OG0002781	-		-		-	OG0002699	Domain of unknown function (DUF427)		-
			-	OG0002783	Protein of unknown function (DUF3800)		-		-	OG0002752	Putative DNA-binding domain		-
			-	OG0002795	CRISPR-associated protein (Cas_Cas02710)		-		-	OG0002782	Alkyl sulfatase dimerisation		-
			-	OG0002850	PFAM UDP-N-acetylglucosamine 2-epimerase		-		-	OG0002802	-		-
			-	OG0002893	-		-		-	OG0002829	-		-
			-	OG0002922	PFAM Uncharacterised protein family UPF0150		-		-	OG0002843	PA14 domain		-
			-	OG0001665	COG3436 Transposase and inactivated derivatives		-		-	OG0002847	AAA domain		-
			-	OG0001828	PFAM Sulfate transporter antisigma-factor antagonist STAS		-		-	OG0002852	coenzyme F420-1:gamma-L-glutamate ligase activity		-
			-	OG0002030	DNA polymerase type-B family		-		-	OG0002854	FAD binding domain of DNA photolyase		-
			-	OG0002122	Protein of unknown function (DUF1673)		-		-	OG0002858	Restriction endonuclease		-
			-	OG0002383	AAA domain (dynein-related subfamily)		-		-	OG0002866	-		-
			-	OG0002445	ATPase, AAA superfamily		-		-	OG0002867	PFAM Polysaccharide biosynthesis protein		-
			-	OG0002514	TIGRFAM CRISPR-associated protein Csm1		-		-	OG0002887	CRISPR-associated protein		-
			-	OG0002645	-		-		-	OG0002892	Archaea-specific editing domain of threonyl-tRNA synthetase		-
			-	OG0002752	Putative DNA-binding domain		-		-	OG0002896	Acyl-coenzyme A:6-aminopenicillanic acid acyl-transferase		-
			-	OG0002852	coenzyme F420-1:gamma-L-glutamate ligase activity		-		-	OG0002898	COG1520 FOG WD40-like repeat		-
			-	OG0002858	Restriction endonuclease		-		-	OG0002903	Alpha/beta hydrolase family		-
			-	OG0002866	-		-		-	OG0002918	transcriptional regulators containing the CopG Arc MetJ DNA-binding domain		-
			-	OG0002887	CRISPR-associated protein		-		-	OG0002926	-		-
			-	OG0002903	Alpha/beta hydrolase family		-		-	OG0002939	-		-
			-	OG0002918	transcriptional regulators containing the CopG Arc MetJ DNA-binding domain		-		-	OG0002947	-		-
			-	OG0002979	Pfam Adenylate and Guanylate cyclase catalytic domain		-		-	OG0002959	-		-
			-	OG0003094	-		-		-	OG0002979	Pfam Adenylate and Guanylate cyclase catalytic domain		-
			-	OG0002117	Domain of unknown function		-		-	OG0002984	-		-
			-	OG0002379	MFS/sugar transport protein		-		-	OG0002987	Predicted AAA-ATPase		-
			-	OG0002528	Right handed beta helix region		-		-	OG0002994	Domain of unknown function (DUF4147)		-
			-	OG0002576	Methyltransferase domain		-		-	OG0003007	PFAM NHL repeat containing protein		-
			-	OG0002728	CRISPR-associated protein TM1802 (cas_TM1802)		-		-	OG0003020	protein carbamoylation		-
			-	OG0002830	Transcriptional regulator, AbrB family		-		-	OG0003056	all-trans-retinol 13,14-reductase activity		-
			-	OG0002839	Involved in the de novo purine biosynthesis. Catalyzes the transfer of formate to 5-phospho-ribosyl-glycinamide (GAR), producing 5-phospho-ribosyl-N-formylglycinamide (FGAR). Formate is provided by PurU via hydrolysis of 10-formyl-tetrahydrofolate		-		-	OG0003060	PFAM Aldehyde dehydrogenase		-
			-	OG0002859	Sir2 family		-		-	OG0003073	Uncharacterized protein conserved in bacteria (DUF2252)		-
			-	OG0002891	COG2172 Anti-sigma regulatory factor (Ser Thr protein kinase)		-		-	OG0003082	Domain of unknown function (DUF365)		-
			-	OG0002929	Metal dependent phosphohydrolases with conserved 'HD' motif.		-		-	OG0003094	-		-
			-	OG0002955	HicA toxin of bacterial toxin-antitoxin,		-		-	OG0003111	-		-
			-	OG0002998	-		-		-	OG0003129	-		-
			-	OG0003080	-		-		-	OG0003135	CRISPR-associated regulatory protein, DevR family		-
			-	OG0003089	Predicted permease		-		-	OG0003139	PIN domain		-
			-	OG0003091	ATP-grasp domain		-		-	OG0003161	-		-
			-	OG0003147	-		-		-	OG0003173	ATPase, AAA superfamily		-
			-	OG0003148	-		-		-	OG0003185	protein related to C-terminal domain of eukaryotic chaperone, SACSIN		-
			-	OG0003162	-		-		-	OG0003194	holo-[acyl-carrier-protein] synthase activity		-
			-	OG0003169	-		-		-	OG0003235	RAMP protein Cmr6		-
			-	OG0003176	PFAM ketose-bisphosphate aldolase, class-II		-		-	OG0003236	CRISPR-associated protein (Cas_Cmr5)		-
			-	OG0003208	-		-		-	OG0003237	CRISPR-associated protein (Cas_Cmr3)		-
			-	OG0003221	Pentapeptide repeats (9 copies)		-		-	OG0003238	TIGRFAM CRISPR-associated RAMP protein, Cmr1 family		-
			-	OG0003275	-		-		-	OG0003251	by modhmm		-
			-	OG0003286	Predicted permease		-		-	OG0003252	-		-
			-	OG0003290	-		-		-	OG0003253	-		-
			-	OG0003329	Isocitrate lyase family		-		-	OG0003259	-		-
			-	OG0001897	PFAM Transposase		-		-	OG0003291	Pyridoxal-dependent decarboxylase conserved domain		-
			-	OG0001955	-		-		-	OG0003293	Mycolic acid cyclopropane synthetase		-
			-	OG0002009	purine nucleotide biosynthetic process		-		-	OG0003340	SAM dependent carboxyl methyltransferase		-
			-	OG0002358	PFAM Transposase		-		-	OG0003345	SMART Integrin alpha beta-propellor repeat protein		-
			-	OG0002363	TIGRFAM CRISPR locus-related DNA-binding protein		-		-	OG0003353	ISXO2-like transposase domain		-
			-	OG0002449	-		-		-	OG0003356	CotH kinase protein		-
			-	OG0002540	PFAM MULE transposase, conserved domain		-		-	OG0003365	-		-
			-	OG0002796	Domain of unknown function (DUF4198)		-		-	OG0003380	AbrB family		-
			-	OG0002831	chlorophyll binding		-		-	OG0003417	CAAX protease self-immunity		-
			-	OG0002872	Carboxypeptidase regulatory-like domain		-		-	OG0003418	SNARE associated Golgi protein		-
			-	OG0002942	-		-		-	OG0003429	-		-
			-	OG0002968	Belongs to the thiolase family		-		-	OG0003430	glutamine amidotransferase		-
			-	OG0002971	Endonuclease I		-		-	OG0003437	-		-
			-	OG0002995	exo-alpha-(2->6)-sialidase activity		-		-	OG0003439	Protein of unknown function DUF84		-
			-	OG0003092	-		-		-	OG0003481	Uroporphyrinogen decarboxylase (URO-D)		-
			-	OG0003168	NACHT domain		-		-	OG0003486	COG2084 3-hydroxyisobutyrate dehydrogenase and related beta-hydroxyacid dehydrogenases		-
			-	OG0003214	Protein of unknown function (DUF3179)		-		-	OG0003494	-		-
			-	OG0003240	Gas vesicles are small, hollow, gas filled protein structures that are found in several microbial planktonic microorganisms. They allow the positioning of the organism at the favorable depth for growth		-		-	OG0003504	Sodium hydrogen exchanger		-
			-	OG0003267	PFAM Transmembrane exosortase (Exosortase_EpsH)		-		-	OG0003512	-		-
			-	OG0003295	GrpB protein		-		-	OG0003516	-		-
			-	OG0003309	COG1002 Type II restriction enzyme, methylase subunits		-		-	OG0003519	UvrD/REP helicase N-terminal domain		-
			-	OG0003342	Saccharopine dehydrogenase C-terminal domain		-		-	OG0003524	Glycosyl transferases group 1		-
			-	OG0003343	-		-		-	OG0003527	Histidine kinase-, DNA gyrase B-, and HSP90-like ATPase		-
			-	OG0003351	CHAT domain		-		-	OG0003534	Archaeal Type IV pilin, N-terminal		-
			-	OG0003367	domain protein		-		-	OG0003538	Activator of Hsp90 ATPase homolog 1-like protein		-
			-	OG0003393	-		-		-	OG0003539	thymidylate kinase		-
			-	OG0003400	-		-		-	OG0003557	Carbon starvation protein		-
			-	OG0003451	PFAM Cupin 2, conserved barrel domain protein		-		-	OG0003558	Transglutaminase-like superfamily		-
			-	OG0003462	-		-		-	OG0003569	WbqC-like protein family		-
			-	OG0003472	CRISPR-associated protein Csc2		-		-	OG0003587	-		-
			-	OG0003478	Domain of unknown function DUF83		-		-	OG0003592	-		-
			-	OG0003520	Domain of unknown function DUF1828		-		-	OG0003593	Protein of unknown function (DUF2795)		-
			-	OG0003528	translation release factor activity		-		-	OG0003606	Peptidase S9 prolyl oligopeptidase active site		-
			-	OG0003529	-		-		-	OG0003607	PFAM Chromate transporter		-
			-	OG0003532	-		-		-	OG0003614	CRISPR-associated protein Cas5		-
			-	OG0003535	-		-		-	OG0003625	-		-
			-	OG0003537	LysE type translocator		-		-	OG0003627	UDP-N-acetylglucosamine 2-epimerase		-
			-	OG0003544	transcription activator, effector binding		-		-	OG0003633	YCII-related domain		-
			-	OG0003609	von willebrand factor, type A		-		-	OG0003658	APHP domain protein		-
			-	OG0003642	-		-		-	OG0003669	HB1, ASXL, restriction endonuclease HTH domain		-
			-	OG0002641	domain, Protein		-		-	OG0003685	Endonuclease that specifically degrades the RNA of RNA- DNA hybrids		-
			-	OG0002651	integral membrane protein		-		-	OG0003696	Dual specificity phosphatase, catalytic domain		-
			-	OG0002807	-		-		-	OG0003700	Serine Threonine protein kinase		-
			-	OG0002809	Cytochrome c		-		-	OG0003703	-		-
			-	OG0002811	-		-		-	OG0003706	amino acid activation for nonribosomal peptide biosynthetic process		-
			-	OG0002878	-		-		-	OG0003709	-		-
			-	OG0002925	LexA-binding, inner membrane-associated putative hydrolase		-		-	OG0003712	Protein of unknown function (DUF1232)		-
			-	OG0002972	amino acid activation for nonribosomal peptide biosynthetic process		-		-	OG0003719	AMP-binding enzyme		-
			-	OG0003016	WD40-like Beta Propeller Repeat		-		-	OG0003721	Belongs to the class I-like SAM-binding methyltransferase superfamily. Glycine N-methyltransferase family		-
			-	OG0003021	Concanavalin A-like lectin/glucanases superfamily		-		-	OG0003726	LexA-binding, inner membrane-associated putative hydrolase		-
			-	OG0003134	Domain of unknown function DUF11		-		-	OG0003728	-		-
			-	OG0003265	-		-		-	OG0003730	thiolester hydrolase activity		-
			-	OG0003285	Cytochrome C and Quinol oxidase polypeptide I		-		-	OG0003737	PFAM NAD-dependent epimerase dehydratase		-
			-	OG0003336	-		-		-	OG0003738	-		-
			-	OG0003339	-		-		-	OG0003739	Protein of unknown function (DUF4435)		-
			-	OG0003350	Protein of unknown function (DUF2283)		-		-	OG0003770	Antibiotic biosynthesis monooxygenase		-
			-	OG0003364	-		-		-	OG0003771	Major facilitator superfamily		-
			-	OG0003372	-		-		-	OG0003777	Pfam HNH endonuclease		-
			-	OG0003396	-		-		-	OG0003780	-		-
			-	OG0003407	-		-		-	OG0003786	Multicopper		-
			-	OG0003411	defense response to virus		-		-	OG0003800	-		-
			-	OG0003412	TIGRFAM CRISPR-associated RAMP protein, Cmr6 family		-		-	OG0003802	Putative undecaprenyl diphosphate synthase		-
			-	OG0003449	-		-		-	OG0003811	-		-
			-	OG0003455	LamG domain protein jellyroll fold domain protein		-		-	OG0003847	Phosphotransferase enzyme family		-
			-	OG0003463	-		-		-	OG0003848	AAA ATPase domain		-
			-	OG0003469	Involved in the import of queuosine (Q) precursors, required for Q precursor salvage		-		-	OG0003857	Peptidase family U32		-
			-	OG0003475	-		-		-	OG0003858	Psort location CytoplasmicMembrane, score		-
			-	OG0003476	Gas vesicles are small, hollow, gas filled protein structures that are found in several microbial planktonic microorganisms. They allow the positioning of the organism at the favorable depth for growth		-		-	OG0003877	-		-
			-	OG0003477	Gas vesicle		-		-	OG0003879	Protein of unknown function (DUF421)		-
			-	OG0003533	von Willebrand factor (vWF) type A domain		-		-	OG0003881	Alpha beta hydrolase		-
			-	OG0003536	membrane protein, required for N-linked glycosylation		-		-	OG0003882	Signal transduction histidine kinase		-
			-	OG0003547	NUDIX domain		-		-	OG0003886	-		-
			-	OG0003550	-		-		-	OG0003889	-		-
			-	OG0003560	-		-		-	OG0003891	-		-
			-	OG0003561	-		-		-	OG0003916	membrane-bound metal-dependent		-
			-	OG0003598	-		-		-	OG0003926	-		-
			-	OG0003602	-		-		-	OG0003927	Domain of unknown function (DUF1788)		-
			-	OG0003620	-		-		-	OG0003930	-		-
			-	OG0003636	-		-		-	OG0003935	-		-
			-	OG0003638	-		-		-	OG0003943	Putative ATP-dependent DNA helicase recG C-terminal		-
			-	OG0003639	-		-		-	OG0003970	-		-
			-	OG0003643	-		-		-	OG0003981	Putative auto-transporter adhesin, head GIN domain		-
			-	OG0003675	-		-		-	OG0003999	Toxic component of a toxin-antitoxin (TA) module. An RNase		-
			-	OG0003687	domain, Protein		-		-	OG0004001	Psort location Cytoplasmic, score		-
			-	OG0003694	-		-		-	OG0004011	-		-
			-	OG0003736	-		-		-	OG0004012	cellulose binding		-
			-	OG0003741	Protein of unknown function (DUF4231)		-		-	OG0004016	Domain of unknown function (DUF4276)		-
			-	OG0003744	retrograde transport, endosome to Golgi		-		-	OG0004017	Protein of unknown function (DUF2637)		-
			-	OG0003746	-		-		-	OG0004024	Peptidase family M48		-
			-	OG0003747	-		-		-	OG0004036	-		-
			-	OG0003748	-		-		-	OG0004046	COG0346 Lactoylglutathione lyase and related lyases		-
			-	OG0003749	-		-		-	OG0004049	Domain of unknown function (DUF4872)		-
			-	OG0003750	-		-		-	OG0004058	Transketolase, pyrimidine binding domain		-
			-	OG0003753	-		-		-	OG0004060	-		-
			-	OG0003755	-		-		-	OG0004066	-		-
			-	OG0003756	-		-		-	OG0004067	-		-
			-	OG0003758	-		-		-	OG0004072	metal-dependent hydrolases with the TIM-barrel fold		-
			-	OG0003759	-		-		-	OG0004076	-		-
			-	OG0003760	-		-		-	OG0004077	Baseplate J family protein		-
			-	OG0003762	COG1205 Distinct helicase family with a unique C-terminal domain including a metal-binding cysteine cluster		-		-	OG0004081	von Willebrand factor (vWF) type A domain		-
			-	OG0003764	PFAM Gas vesicle synthesis		-		-	OG0004124	-		-
			-	OG0003765	PFAM Gas vesicle synthesis		-		-	OG0004125	-		-
			-	OG0003766	TIGRFAM CRISPR-associated protein, Csx3 family		-		-	OG0004128	-		-
			-	OG0003767	Protein of unknown function (DUF835)		-		-	OG0004130	Belongs to the glyceraldehyde-3-phosphate dehydrogenase family		-
			-	OG0003768	Gas vesicle synthesis		-		-	OG0004135	-		-
			-	OG0003801	membrane		-		-	OG0004136	-		-
			-	OG0003803	COG1077 Actin-like ATPase involved in cell morphogenesis		-		-	OG0004138	Transglutaminase-like superfamily		-
			-	OG0003804	PFAM GCN5-related N-acetyltransferase		-		-	OG0004139	Phosphopantetheine attachment site		-
			-	OG0003805	-		-		-	OG0004142	-		-
			-	OG0003806	Roadblock LC7 family protein		-		-	OG0004144	-		-
			-	OG0003807	PFAM 4-vinyl reductase, 4VR		-		-	OG0004147	-		-
			-	OG0003808	COG0454 Histone acetyltransferase HPA2 and related acetyltransferases		-		-	OG0004148	-		-
			-	OG0003809	-		-		-	OG0004149	Glyoxalase-like domain		-
			-	OG0003810	-		-		-	OG0004155	-		-
			-	OG0003813	-		-		-	OG0004161	-		-
			-	OG0003815	Protein of unknown function (DUF3795)		-		-	OG0004165	PFAM plasmid stabilization system		-
			-	OG0003826	TIGRFAM CRISPR-associated protein, Csx11 family		-		-	OG0004168	PFAM Glycosyl transferase family 2		-
			-	OG0003827	-		-		-	OG0004174	Alpha beta		-
			-	OG0003833	-		-		-	OG0004176	Histidine phosphatase superfamily (branch 1)		-
			-	OG0003853	protein conserved in archaea		-		-	OG0004209	-		-
			-	OG0003890	-		-		-	OG0004227	Glycosyl transferases group 1		-
			-	OG0003893	-		-		-	OG0004250	sulfurtransferase activity		-
			-	OG0003895	-		-		-	OG0004251	X-Pro dipeptidyl-peptidase (S15 family)		-
			-	OG0003898	Protein of unknown function (DUF3795)		-		-	OG0004254	DNA ligase that seals nicks in double-stranded DNA during DNA replication, DNA recombination and DNA repair		-
			-	OG0003902	-		-		-	OG0004258	PFAM Tetrahydromethanopterin S-methyltransferase MtrH subunit		-
			-	OG0003903	Putative zinc- or iron-chelating domain		-		-	OG0004260	Acetoacetate decarboxylase (ADC)		-
			-	OG0003906	5' nucleotidase, deoxy (Pyrimidine), cytosolic type C protein (NT5C)		-		-	OG0004261	ASPIC and UnbV		-
			-	OG0003907	-		-		-	OG0004262	GAF domain protein		-
			-	OG0003911	Domain of unknown function (DUF4870)		-		-	OG0004265	-		-
			-	OG0003940	-		-		-	OG0004267	deoxyhypusine monooxygenase activity		-
			-	OG0003947	-		-		-	OG0004275	PFAM Bacterial protein of		-
			-	OG0003948	-		-		-	OG0004277	metallopeptidase activity		-
			-	OG0003952	COG0737 5'-nucleotidase 2',3'-cyclic phosphodiesterase and related esterases		-		-	OG0004278	-		-
			-	OG0003954	Ami_2		-		-	OG0004279	Formylmethanofuran dehydrogenase subunit A		-
			-	OG0003955	-		-		-	OG0004280	-		-
			-	OG0003956	-		-		-	OG0004281	Metallo-beta-lactamase superfamily		-
			-	OG0003957	Double zinc ribbon		-		-	OG0004290	-		-
			-	OG0003960	Catalyzes the hydrolysis of futalosine (FL) to dehypoxanthine futalosine (DHFL) and hypoxanthine, a step in the biosynthesis of menaquinone (MK, vitamin K2)		-		-	OG0004292	COG0477 Permeases of the major facilitator superfamily		-
			-	OG0003961	Catalyzes the conversion of cyclic dehypoxanthine futalosine (cyclic DHFL) into 1,4-dihydroxy-6-naphthoate, a step in the biosynthesis of menaquinone (MK, vitamin K2)		-		-	OG0004294	-		-
			-	OG0003965	-		-		-	OG0004299	-		-
			-	OG0003969	Catalyzes the dehydration of chorismate into 3- (1- carboxyvinyl)oxy benzoate, a step in the biosynthesis of menaquinone (MK, vitamin K2)		-		-	OG0004300	-		-
			-	OG0003971	Cytochrome C biogenesis protein		-		-	OG0004369	DNA binding		-
			-	OG0003972	Required for disulfide bond formation in some periplasmic proteins. Acts by transferring its disulfide bond to other proteins and is reduced in the process		-		-	OG0004370	Catalyzes the transfer of a two-carbon ketol group from a ketose donor to an aldose acceptor, via a covalent intermediate with the cofactor thiamine pyrophosphate		-
			-	OG0003973	-		-		-	OG0004372	VIT family		-
			-	OG0003975	Universal stress protein family		-		-	OG0004375	-		-
			-	OG0004002	Cleaves peptides in various proteins in a process that requires ATP hydrolysis. Has a chymotrypsin-like activity. Plays a major role in the degradation of misfolded proteins		-		-	OG0004394	-		-
			-	OG0004003	Rubrerythrin		-		-	OG0004396	Calcineurin-like phosphoesterase		-
			-	OG0001005	NADH ubiquinone oxidoreductase 20 kDa subunit		-		-	OG0004409	COG0683 ABC-type branched-chain amino acid transport systems, periplasmic component		-
			-	OG0000883	Flavodoxin		-		-	OG0004416	site-specific DNA-methyltransferase (adenine-specific) activity		-
			-	OG0000250	Flagellin is the subunit protein which polymerizes to form the filaments of archaeal flagella		-		-	OG0004451	Restriction endonuclease		-
			-	OG0001223	PFAM Aminotransferase class I and II		-		-	OG0004454	ubiquitin protein ligase activity		-
			-	OG0001495	Probably functions as a manganese efflux pump		-		-	OG0004456	-		-
			-	OG0001561	COG1940 Transcriptional regulator sugar kinase		-		-	OG0004466	Domain of unknown function (DUF4440)		-
			-	OG0001433	membrane protein (DUF2178)		-		-	OG0004472	SnoaL-like domain		-
			-	OG0001485	-		-		-	OG0004480	FES		-
			-	OG0001346	Putative redox-active protein (C_GCAxxG_C_C)		-		-	OG0004482	-		-
			-	OG0001207	PFAM proteinase inhibitor I4 serpin		-		-	OG0004492	-		-
			-	OG0001224	-		-		-	OG0004493	-		-
			-	OG0001476	Produces ATP from ADP in the presence of a proton gradient across the membrane		-		-	OG0004496	Belongs to the cation diffusion facilitator (CDF) transporter (TC 2.A.4) family		-
			-	OG0001570	AI-2E family transporter		-		-	OG0004500	-		-
			-	OG0001727	ATPase activity		-		-	OG0004504	COG1506 Dipeptidyl aminopeptidases acylaminoacyl-peptidases		-
			-	OG0001187	STAS domain		-		-	OG0004546	Major facilitator superfamily		-
			-	OG0001839	-		-		-	OG0004550	zinc ion binding		-
			-	OG0001696	Histidine kinase-like ATPase domain		-		-	OG0004551	-		-
			-	OG0001815	-		-		-	OG0004553	Exporter of polyketide antibiotics		-
			-	OG0001892	COG0491 Zn-dependent hydrolases, including glyoxylases		-		-	OG0004554	-		-
			-	OG0001987	-		-		-	OG0004555	-		-
			-	OG0001652	Uncharacterized protein family, UPF0114		-		-	OG0004563	-		-
			-	OG0001882	Protein of unknown function (DUF2281)		-		-	OG0004566	Domain of unknown function (DUF4932)		-
			-	OG0001919	MgtE intracellular N domain		-		-	OG0004568	antibiotic catabolic process		-
			-	OG0002041	PFAM Orn Lys Arg decarboxylase major region		-		-	OG0004570	-		-
			-	OG0002050	N-formylglutamate amidohydrolase		-		-	OG0004574	PFAM Endonuclease Exonuclease phosphatase		-
			-	OG0001915	Protein of unknown function (DUF3795)		-		-	OG0004576	-		-
			-	OG0001921	GlcNAc-PI de-N-acetylase		-		-	OG0004577	-		-
			-	OG0002096	-		-		-	OG0004578	Pfam:DUF91		-
			-	OG0001863	Protein of unknown function (DUF1254)		-		-	OG0004581	Fe-S-cluster oxidoreductase		-
			-	OG0001984	Receptor family ligand binding region		-		-	OG0004583	Dynamin family		-
			-	OG0002172	COG2041 Sulfite oxidase and related enzymes		-		-	OG0004589	-		-
			-	OG0002212	ABC 3 transport family		-		-	OG0004600	protein kinase activity		-
			-	OG0001939	Leucine carboxyl methyltransferase		-		-	OG0004603	-		-
			-	OG0002287	-		-		-	OG0004605	-		-
			-	OG0002342	-		-		-	OG0004638	-		-
			-	OG0001890	Psort location CytoplasmicMembrane, score 10.00		-		-	OG0004639	-		-
			-	OG0001976	KTSC domain		-		-	OG0004644	von willebrand factor, type A		-
			-	OG0002103	Polysaccharide biosynthesis protein		-		-	OG0004645	Protein phosphatase 2C		-
			-	OG0002215	-		-		-	OG0004650	-		-
			-	OG0002227	Thiol disulfide interchange protein		-		-	OG0004651	-		-
			-	OG0002249	histidine kinase HAMP region domain protein		-		-	OG0004653	Domain of unknown function (DUF4418)		-
			-	OG0002330	PFAM Pyridoxamine 5'-phosphate		-		-	OG0004654	Gamma interferon inducible lysosomal thiol reductase (GILT)		-
			-	OG0002332	Cupin domain		-		-	OG0004656	Methyltransferase domain		-
			-	OG0002392	Domain of unknown function (DUF1508)		-		-	OG0004657	nucleic acid-binding protein contains PIN domain		-
			-	OG0001814	KaiB		-		-	OG0004659	-		-
			-	OG0001871	-		-		-	OG0004660	Phosphoadenosine phosphosulfate reductase		-
			-	OG0002292	DNA polymerase LigD, polymerase domain		-		-	OG0004661	DNA-sulfur modification-associated		-
			-	OG0002515	DnaJ molecular chaperone homology domain		-		-	OG0004665	-		-
			-	OG0002529	Belongs to the glycosyl hydrolase 57 family		-		-	OG0004668	DGC domain		-
			-	OG0001763	Leucine carboxyl methyltransferase		-		-	OG0004670	-		-
			-	OG0002308	-		-		-	OG0004672	SMART cellulose binding type IV		-
			-	OG0002315	PFAM Polysaccharide pyruvyl transferase		-		-	OG0004673	-		-
			-	OG0002464	bis(5'-adenosyl)-triphosphatase activity		-		-	OG0004675	-		-
			-	OG0002471	alpha/beta hydrolase fold		-		-	OG0004678	-		-
			-	OG0002626	-		-		-	OG0004680	PFAM PKD domain containing protein		-
			-	OG0001969	Domain of unknown function (DUF1998)		-		-	OG0004681	Specifically catalyzes the NAD or NADP-dependent dehydrogenation of L-aspartate to iminoaspartate		-
			-	OG0002328	Transport of potassium into the cell		-		-	OG0004682	-		-
			-	OG0002416	-		-		-	OG0004683	50S ribosomal protein L21		-
			-	OG0002417	AraC-like ligand binding domain		-		-	OG0004687	PFAM phosphatidate cytidylyltransferase		-
			-	OG0002424	Glycosyl transferases group 1		-		-	OG0004688	COG0454 Histone acetyltransferase HPA2 and related acetyltransferases		-
			-	OG0002475	AAA domain		-		-	OG0004690	FCD		-
			-	OG0002520	Clostripain family		-		-	OG0004692	membrane		-
			-	OG0002560	Asp/Glu/Hydantoin racemase		-		-	OG0004705	Putative PD-(D/E)XK family member, (DUF4420)		-
			-	OG0002562	Protein of unknown function, DUF488		-		-	OG0004706	Z1 domain		-
			-	OG0002619	Sodium/hydrogen exchanger family		-		-	OG0004707	-		-
			-	OG0002656	Domain of unknown function (DUF4062)		-		-	OG0004708	-		-
			-	OG0002769	Putative ATP-dependant zinc protease		-		-	OG0004821	-		-
			-	OG0002774	-		-		-	OG0004823	-		-
			-	OG0000804	SPTR Transposase, IS4 family protein		-		-	OG0004825	-		-
			-	OG0002042	Periplasmic copper-binding protein (NosD)		-		-	OG0004827	-		-
[truncated: 2,626 more rows]

## Sheet: Sheet5
Supplementary Table5. KEGG annotation of specific accessary genome of SC-Methanosarcinia
[truncated: 2,076 more rows]

[truncated: 3 more sheets: Sheet6, Sheet7, Sheet8]
